# Supplementary material for: Clustered Distribution of Natural Product Leads of Drugs in the Chemical Space as Influenced by the Privileged Target-Sites
Source: PubMed Central journal article supplement (PMC5380136; doi:10.1038/srep09325), 2015-03-20

## Supplementary Tables and Figures for

### Clustered Distribution of Natural Product Leads of Drugs in the Chemical Space as Influenced by the Privileged Target-Sites

Lin Tao<sup>1,2,3</sup>, Feng Zhu<sup>1,2,4</sup>, Chu Qin<sup>2,3</sup>, Cheng Zhang<sup>2</sup>, Shangying Chen<sup>2</sup>, Peng Zhang<sup>2</sup>, Cunlong Zhang<sup>1</sup>, Chunyan Tan<sup>1</sup>, Chunmei Gao<sup>1</sup>, Zhe Chen<sup>5</sup>, Yuyang Jiang<sup>1\*</sup>, and Yu Zong Chen<sup>1,2,3\*</sup>

<sup>1</sup>*Department of Pharmacology and Pharmaceutical Sciences, School of Medicine, Tsinghua University, Beijing, P. R. China, and the Ministry-Province Jointly Constructed Base for State Key Lab-Shenzhen Key Laboratory of Chemical Biology, the Graduate School at Shenzhen, Tsinghua University, Shenzhen, P. R. China*

<sup>2</sup>*Bioinformatics and Drug Design Group, Department of Pharmacy, and Center for Computational Science and Engineering, National University of Singapore, Singapore 117543*

<sup>3</sup>*NUS Graduate School for Integrative Sciences and Engineering, Singapore 117456*

<sup>4</sup>*Innovative Drug Research Centre and College of Chemistry and Chemical Engineering, Chongqing University, Chongqing, P. R. China*

<sup>5</sup>*Zhejiang Key Laboratory of Gastro-intestinal Pathophysiology, Zhejiang Hospital of Traditional Chinese Medicine, Zhejiang Chinese Medical University, Hangzhou, P. R. China*

*\*Corresponding Authors: Y.Z. Chen. Tel.: 65-6874-6877. Fax: 65-6774-6756. E-mail:*

*phacyz@nus.edu.sg; Y.Y. Jiang. Tel.: 86- 0755-26036017. Fax: 86- 0755-26036017. E-mail:*

*Jiangyy@sz.tsinghua.edu.cn*

**Supplementary Table S1** List of FDA approved drugs in 2008-2012. The natural product-related drugs are marked based on their types as follows: N natural product, ND derived from a natural product and is usually a semisynthetic modification, NM natural product mimic, B non human biologics include peptides, nucleic acids, proteins, and antibodies, B\* human biologics include peptides, nucleic acids, proteins, and antibodies, S\* made by total synthesis based on the pharmacophore from a natural product.

| Drug Generic Name                                                      | Natural Product Related Drug Type | Lead of Natural Product Related Drug | Targeted Disease                                                                          | Year of Approval |
|------------------------------------------------------------------------|-----------------------------------|--------------------------------------|-------------------------------------------------------------------------------------------|------------------|
| Acidinium bromide                                                      |                                   |                                      | Bronchospasms associated with COPD                                                        | 2012             |
| Apixaban                                                               |                                   |                                      | Stroke and systemic embolism in patients with non-valvular atrial fibrillation            | 2012             |
| Avanafil                                                               |                                   |                                      | Erectile dysfunction                                                                      | 2012             |
| Axitinib                                                               |                                   |                                      | Advanced renal cell carcinoma                                                             | 2012             |
| Bedaquiline fumarate                                                   |                                   |                                      | Pulmonary multidrug-resistant tuberculosis                                                | 2012             |
| Bosutinib monohydrate                                                  |                                   |                                      | Chronic, accelerated or blast phase Ph+ chronic myelogenous leukaemia                     | 2012             |
| Cabozantinib s-malate                                                  |                                   |                                      | Progressive, metastatic medullary thyroid cancer                                          | 2012             |
| Carfilzomib                                                            | ND                                | Epoxomicin                           | Multiple myeloma                                                                          | 2012             |
| Citric acid; Magnesium oxide; Sodium picosulfate                       |                                   |                                      | Cleansing of the colon before colonoscopy                                                 | 2012             |
| Cobicistat; Elvitegravir; Emtricitabine; Tenofovir disoproxil fumarate |                                   |                                      | HIV-1 infection                                                                           | 2012             |
| Crofelemer                                                             | N                                 | Crofelemer                           | HIV-associated diarrhoea                                                                  | 2012             |
| Enzalutamide                                                           |                                   |                                      | Metastatic castration-resistant prostate cancer                                           | 2012             |
| Glucarpidase                                                           | B*                                | Carboxypeptidase G2                  | Toxic plasma methotrexate concentrations in patients with delayed methotrexate clearance  | 2012             |
| Ingenol mebutate                                                       | N                                 | Ingenol mebutate                     | Actinic keratosis                                                                         | 2012             |
| Linaclotide                                                            | B*                                | Linaclotide                          | Irritable bowel syndrome with constipation; chronic idiopathic constipation               | 2012             |
| Lorcaserin hydrochloride                                               |                                   |                                      | Obesity                                                                                   | 2012             |
| Lucinactant                                                            | ND                                | Lucinactant                          | Prevention of respiratory distress syndrome                                               | 2012             |
| Mirabegron                                                             |                                   |                                      | Overactive bladder                                                                        | 2012             |
| Ocriplasmin                                                            | B*                                | Ocriplasmin                          | Symptomatic vitreomacular adhesion                                                        | 2012             |
| Omacetaxine mepesuccinate                                              | N                                 | Homoharringtonine                    | Chronic or accelerated-phase chronic myeloid leukaemia                                    | 2012             |
| Pasireotide diaspertate                                                | ND                                | Somatostatin                         | Cushing's disease                                                                         | 2012             |
| Peginesatide acetate                                                   | NM                                | Peginesatide                         | Anaemia due to chronic kidney disease                                                     | 2012             |
| Pertuzumab                                                             | B*                                | Pertuzumab                           | HER2-positive metastatic breast cancer                                                    | 2012             |
| Raxibacumab                                                            | B*                                | IgG1 $\lambda$                       | Anthrax                                                                                   | 2012             |
| Regorafenib                                                            |                                   |                                      | Metastatic colorectal cancer                                                              | 2012             |
| Tafuprost                                                              | ND                                | Prostaglandin E1                     | Elevated intraocular pressure in patients with open-angle glaucoma or ocular hypertension | 2012             |
| Taliglucerase alfa                                                     | B*                                | Taliglucerase alfa                   | Gaucher's disease                                                                         | 2012             |

|                                   |    |                                                                                                                 |                                                                           |      |
|-----------------------------------|----|-----------------------------------------------------------------------------------------------------------------|---------------------------------------------------------------------------|------|
| Tbo-filgrastim                    | B* | Granulocyte colony-stimulating factor                                                                           | Severe neutropaenia in patients with non-myeloid malignancies             | 2012 |
| Teduglutide                       | B* | Glucagon-like peptide-2                                                                                         | Short bowel syndrome                                                      | 2012 |
| Teriflunomide                     |    |                                                                                                                 | Relapsing forms of multiple sclerosis                                     | 2012 |
| Tofacitinib citrate               |    |                                                                                                                 | Severely active rheumatoid arthritis                                      | 2012 |
| Vismodegib                        | S* | Cyclopamine                                                                                                     | Metastatic or locally advanced basal cell carcinoma                       | 2012 |
| Ziv-aflibercept                   | B* | VEGFR1, VEGFR2, IgG                                                                                             | Metastatic colorectal cancer                                              | 2012 |
| Ivacaftor                         |    |                                                                                                                 | Cystic fibrosis in patients with the G551D mutation in the CFTR gene      | 2012 |
| Lomitapide mesylate               |    |                                                                                                                 | Homozygous familial hypercholesterolaemia                                 | 2012 |
| Perampanel                        |    |                                                                                                                 | Partial-onset seizures in patients with epilepsy                          | 2012 |
| Ponatinib hydrochloride           |    |                                                                                                                 | Chronic, accelerated or blast-phase chronic myeloid leukaemia             | 2012 |
| Abiraterone                       | ND | Pregnenolone                                                                                                    | Metastatic castration-resistant prostate cancer                           | 2011 |
| Aflibercept                       | B* | Fusion protein (chimeric protein)                                                                               | Neovascular (wet) age-related macular degeneration                        | 2011 |
| Asparaginase erwinia chrysanthemi | B* | Asparaginase                                                                                                    | Acute lymphoblastic leukaemia                                             | 2011 |
| Azilsartan kamedoxomil            |    |                                                                                                                 | Hypertension                                                              | 2011 |
| Belatacept                        | B* | A fusion protein of the Fc fragment of a human IgG1 immunoglobulin linked to the extracellular domain of CTLA-4 | Organ rejection in kidney transplant                                      | 2011 |
| Belimumab                         | B* | Belimumab                                                                                                       | Active, autoantibody-positive, systemic lupus erythematosus               | 2011 |
| Boceprevir                        |    |                                                                                                                 | HCV genotype 1                                                            | 2011 |
| Crizotinib                        |    |                                                                                                                 | ALK-positive advanced or metastatic NSCLC                                 | 2011 |
| Ezogabine                         |    |                                                                                                                 | Partial-onset seizures                                                    | 2011 |
| Fidaxomicin                       | N  | Fidaxomicin                                                                                                     | Clostridium difficile-associated diarrhoea                                | 2011 |
| Icatibant                         | NM | Bradykinin                                                                                                      | Hereditary angioedema                                                     | 2011 |
| Indacaterol maleate               |    |                                                                                                                 | COPD                                                                      | 2011 |
| Ipilimumab                        | B* | Ipilimumab                                                                                                      | Unresectable or metastatic melanoma                                       | 2011 |
| Linagliptin                       | ND | Xanthine                                                                                                        | Type 2 diabetes                                                           | 2011 |
| Rilpivirine                       | NM | Pyrimidine                                                                                                      | HIV-1 infection                                                           | 2011 |
| Roflumilast                       |    |                                                                                                                 | COPD exacerbations                                                        | 2011 |
| Ruxolitinib phosphate             |    |                                                                                                                 | Intermediate or high-risk myelofibrosis                                   | 2011 |
| Spinosad                          | N  | Spinosyn D                                                                                                      | Head lice                                                                 | 2011 |
| Telaprevir                        | NM | NS5A-5B substrate decamer peptide                                                                               | HCV genotype 1                                                            | 2011 |
| Ticagrelor                        | ND | Adenosine triphosphate                                                                                          | Thrombotic cardiovascular events in patients with acute coronary syndrome | 2011 |
| Vilazodone hydrochloride          |    |                                                                                                                 | Major depressive disorder                                                 | 2011 |
| Brentuximab vedotin               |    |                                                                                                                 | Hodgkin's lymphoma; systemic anaplastic large cell lymphoma               | 2011 |
| Clobazam                          |    |                                                                                                                 | Seizures associated with Lennox-Gastaut syndrome                          | 2011 |
| Deferiprone                       |    |                                                                                                                 | Transfusional iron overload due to thalassaemia syndromes                 | 2011 |
| Gabapentin enacarbil              |    |                                                                                                                 | Moderate-to-severe restless legs syndrome                                 | 2011 |

|                                                |       |                                                                 |                                                                         |      |
|------------------------------------------------|-------|-----------------------------------------------------------------|-------------------------------------------------------------------------|------|
| Rivaroxaban                                    |       |                                                                 | Prophylaxis of deep vein thrombosis in hip and knee replacement surgery | 2011 |
| Vandetanib                                     |       |                                                                 | Unresectable or metastatic medullary thyroid cancer                     | 2011 |
| Vemurafenib                                    |       |                                                                 | BRAF-positive unresectable or metastatic melanoma                       | 2011 |
| Alcaftadine                                    |       |                                                                 | Allergic conjunctivitis                                                 | 2010 |
| Alpha1-proteinase inhibitor                    | B*    | Alpha1-proteinase inhibitor                                     | Emphysema                                                               | 2010 |
| Cabazitaxel; Xrp-6258                          | ND    | Taxol                                                           | Prostate cancer                                                         | 2010 |
| Carglumic acid                                 | ND    | A man-made form of an enzyme that occurs naturally in the liver | Acute hyperammonaemia                                                   | 2010 |
| Ceftaroline fosamil                            | ND    | Cephalosporin                                                   | Skin and skin-structure infections; community acquired pneumonia        | 2010 |
| Collagenase clostridium histolyticum           | B     | Collagenase clostridium histolyticum                            | Dupuytren's contracture                                                 | 2010 |
| Dabigatran; Bibr 953                           | S*/NM | Thrombin-interacting part of fibrinogen                         | Stroke prevention in atrial fibrillation                                | 2010 |
| Dalfampridine                                  | ND    | Pyridine                                                        | Improving walking in patients with multiple sclerosis                   | 2010 |
| Denosumab                                      | B*    | Denosumab                                                       | Postmenopausal osteoporosis?                                            | 2010 |
| Dienogest; Estradiol valerate                  |       |                                                                 | Contraception                                                           | 2010 |
| Eribulin; E7389; Nsc-707389; Eribulin mesylate | ND    | Halichondrin B                                                  | Breast cancer                                                           | 2010 |
| Fingolimod; Fty720                             | ND    | Myriocin                                                        | Multiple sclerosis                                                      | 2010 |
| Immune globulin subcutaneous, 20% liquid       | B*    | Immunoglobulin G                                                | Primary immunodeficiencies                                              | 2010 |
| Incobotulinumtoxina                            | B     | Incobotulinumtoxina                                             | Cervical dystonia and blepharospasm                                     | 2010 |
| Liraglutide                                    | ND    | Peptidomimetic of GLP-1 peptide                                 | Type 2 diabetes                                                         | 2010 |
| Lurasidone hydrochloride                       |       |                                                                 | Schizophrenia                                                           | 2010 |
| Pegloticase                                    | B*    | Urate oxidase                                                   | Gout                                                                    | 2010 |
| Tesamorelin                                    | B*    | Growth-hormone-releasing hormone                                | HIV lipodystrophy                                                       | 2010 |
| Tocilizumab                                    | B*    | Tocilizumab                                                     | Rheumatoid arthritis                                                    | 2010 |
| Ulipristal                                     | ND    | Progesterone                                                    | Contraception                                                           | 2010 |
| Velaglucerase alfa                             | B*    | $\beta$ -glucocerebrosidase                                     | Gaucher's disease                                                       | 2010 |
| Polidocanol                                    |       |                                                                 | Uncomplicated spider veins and uncomplicated reticular veins            | 2010 |
| Abobotulinum-toxin a                           | B     | Abobotulinum-toxin a                                            | Cervical dystonia and glabellar lines                                   | 2009 |
| Artemether; lumefantrine                       | ND    | Artemisinin                                                     | Malaria                                                                 | 2009 |
| Asenapine maleate                              |       |                                                                 | Schizophrenia and bipolar disorder                                      | 2009 |
| Benzyl alcohol                                 |       |                                                                 | Head lice                                                               | 2009 |
| Bepotastine besilate                           |       |                                                                 | Allergic conjunctivitis                                                 | 2009 |
| Besifloxacin hydrochloride                     |       |                                                                 | Bacterial conjunctivitis                                                | 2009 |
| Canakinumab                                    | B*    | Canakinumab                                                     | Cryopyrin-associated periodic syndromes                                 | 2009 |
| Dronedaron hcl                                 | ND    | Khellin                                                         | Atrial fibrillation and atrial flutter                                  | 2009 |
| Ecallantide                                    | B     | Aprotinin                                                       | Hereditary angioedema                                                   | 2009 |
| Everolimus; Rad-001; Sdz rad                   | ND    | Sirolimus                                                       | Renal cell carcinoma                                                    | 2009 |
| Febuxostat                                     |       |                                                                 | Hyperuricaemia in patients with gout                                    | 2009 |
| Golimumab                                      | B*    | Golimumab                                                       | Rheumatoid arthritis, psoriatic arthritis and ankylosing                | 2009 |

|                            |       |                                                                                      |                                                                                                                                                 |      |
|----------------------------|-------|--------------------------------------------------------------------------------------|-------------------------------------------------------------------------------------------------------------------------------------------------|------|
|                            |       |                                                                                      | spondylitis                                                                                                                                     |      |
| lloperidone                |       |                                                                                      | Schizophrenia                                                                                                                                   | 2009 |
| Milnacipran hydrochloride  |       |                                                                                      | Fibromyalgia                                                                                                                                    | 2009 |
| Ofatumumab                 | B*    | Ofatumumab                                                                           | Chronic lymphocytic leukaemia                                                                                                                   | 2009 |
| Pazopanib; Gw-786034       | S/NM  | Zeatin                                                                               | Renal cell carcinoma                                                                                                                            | 2009 |
| Pitavastatin               | S*/NM | Mevastatin                                                                           | Hyperlipidaemia and mixed dyslipidaemia                                                                                                         | 2009 |
| Pralatrexate               | ND    | Folic acid                                                                           | Peripheral T cell lymphoma                                                                                                                      | 2009 |
| Romidepsin                 | N     | Romidepsin                                                                           | Cutaneous T cell lymphoma                                                                                                                       | 2009 |
| Saxagliptin hydrochloride  |       |                                                                                      | Type 2 diabetes                                                                                                                                 | 2009 |
| Telavancin                 | ND    | Vancomycin                                                                           | Complicated skin and skin structure infections                                                                                                  | 2009 |
| Ustekinumab                | B*    | Ustekinumab                                                                          | Moderate-to-severe plaque psoriasis                                                                                                             | 2009 |
| Vigabatrin                 | ND    | Gamma-aminobutyric acid (GABA)                                                       | Infantile spasms in children aged 1 month to 2 years and complex partial seizures in adults                                                     | 2009 |
| Prasugrel hydrochloride    |       |                                                                                      | Reduction of thrombotic cardiovascular events in patients with acute coronary syndrome undergoing percutaneous coronary intervention            | 2009 |
| Tolvaptan                  |       |                                                                                      | Hypervolaemic and euvolaemic hyponatraemia, including patients with heart failure, cirrhosis and syndrome of inappropriate antidiuretic hormone | 2009 |
| Bendamustine hydrochloride |       |                                                                                      | Chronic lymphocytic leukaemia                                                                                                                   | 2008 |
| Certolizumab pegol         | B*    | Certolizumab pegol                                                                   | Crohn's disease                                                                                                                                 | 2008 |
| Degarelix                  | NM    | Gonadotropin-releasing hormone (GnRH decapeptide)                                    | Advanced prostate cancer                                                                                                                        | 2008 |
| Desvenlafaxine             | ND    | Benzylamine                                                                          | Major depressive disorder                                                                                                                       | 2008 |
| Difluprednate              | ND    | Cortisol                                                                             | Inflammation and pain associated with ocular surgery                                                                                            | 2008 |
| Etravirine                 |       |                                                                                      | HIV-1                                                                                                                                           | 2008 |
| Fesoterodine fumarate      |       |                                                                                      | Overactive bladder disorder                                                                                                                     | 2008 |
| Fospropofol disodium       |       |                                                                                      | Monitored anaesthesia care sedation                                                                                                             | 2008 |
| Lacosamide                 |       |                                                                                      | Partial-onset seizures in epilepsy                                                                                                              | 2008 |
| Methylnaltrexone bromide   | ND    | Morphine                                                                             | Opioid-induced constipation                                                                                                                     | 2008 |
| Rilonacept                 | B*    | Fc portion of human IgG1 combined with extracellular portions of IL-1R1 and IL-1RAcP | Cryopyrin-associated periodic syndromes including familial cold autoinflammatory syndrome and Muckle–Wells syndrome                             | 2008 |
| Romiplostim                | B*    | Thrombopoietin                                                                       | Thrombocytopenia in patients with chronic immune (idiopathic) thrombocytopenic purpura                                                          | 2008 |
| Silodosin                  |       |                                                                                      | Benign prostatic hyperplasia                                                                                                                    | 2008 |
| Tapentadol hydrochloride   |       |                                                                                      | Moderate to severe acute pain                                                                                                                   | 2008 |
| Alvimopan                  |       |                                                                                      | To accelerate gastrointestinal recovery following bowel resection surgery                                                                       | 2008 |
| Clevidipine                |       |                                                                                      | Peri-operative hypertension when oral therapy is not feasible or not desirable                                                                  | 2008 |
| Eltrombopag olamine        |       |                                                                                      | Thrombocytopenia in patients with chronic immune (idiopathic) thrombocytopenic purpura                                                          | 2008 |
| Plerixafor                 |       |                                                                                      | Autologous transplantation in patients with non-Hodgkin's lymphoma and multiple myeloma                                                         | 2008 |
| Rufinamide                 |       |                                                                                      | Seizures associated with Lennox–Gastaut syndrome                                                                                                | 2008 |
| Tetrabenazine              |       |                                                                                      | Chorea associated with Huntington's disease                                                                                                     | 2008 |

**Supplementary Table S2** List of the approved nature-related small molecule drugs, their natural product leads and the molecular scaffolds of the leads. Nature-related small molecule drugs include natural products and natural product semi-synthetic derivatives, mimetics, and pharmacophore-guided synthetic molecules.

| Drug Name                 | Drug Lead                         | Lead Scaffold                                                                           | Drug Type | Targeted Disease                                                                          | Year of Approval |
|---------------------------|-----------------------------------|-----------------------------------------------------------------------------------------|-----------|-------------------------------------------------------------------------------------------|------------------|
| Vismodegib                | Cyclopamine                       | Steroidal jerveratrum alkaloids                                                         | S*        | Metastatic or locally advanced basal cell carcinoma                                       | 2012             |
| Tafluprost                | Prostaglandin E1                  | Prostaglandins                                                                          | ND        | Elevated intraocular pressure in patients with open-angle glaucoma or ocular hypertension | 2012             |
| Pasireotide diaspertate   | Somatostatin                      | Somatostatin peptides ; GPCR targeting peptide hormones & analogues (cyclohexapeptides) | ND        | Cushing's disease                                                                         | 2012             |
| Carfilzomib               | Epoxomicin                        | Epoxyketone containing oligopeptides                                                    | ND        | Multiple myeloma                                                                          | 2012             |
| Omacetaxine mepesuccinate | Homoharringtonine                 | Cephalotaxine alkaloids                                                                 | N         | Chronic or accelerated-phase chronic myeloid leukaemia                                    | 2012             |
| Ingenol mebutate          | Ingenol mebutate                  | Diterpenes                                                                              | N         | Actinic keratosis                                                                         | 2012             |
| Crofelemer                | Crofelemer                        | Proanthocyanidins                                                                       | N         | HIV-associated diarrhoea                                                                  | 2012             |
| Telaprevir                | NS5A-5B substrate decamer peptide | Decamer peptides                                                                        | NM        | HCV genotype 1                                                                            | 2011             |
| Icatibant                 | Bradykinin                        | Bradykinin peptides (nonapeptides)                                                      | NM        | Hereditary angioedema                                                                     | 2011             |
| Rilpivirine               | Pyrimidine                        | Pyrimidine analogues                                                                    | NM        | HIV-1 infection                                                                           | 2011             |
| Abiraterone               | Pregnenolone                      | Progestogens                                                                            | ND        | Metastatic castration-resistant prostate cancer                                           | 2011             |
| Linagliptin               | Xanthine                          | Purine analogues xanthine-type                                                          | ND        | Type 2 diabetes                                                                           | 2011             |
| Ticagrelor                | Adenosine triphosphate            | Purine nucleoside analogues                                                             | ND        | Thrombotic cardiovascular events in patients with acute coronary syndrome                 | 2011             |
| Spinosad                  | Spinosyn A                        | Spinosyns                                                                               | N         | Head lice                                                                                 | 2011             |
| Spinosad                  | Spinosyn D                        | Spinosyns                                                                               | N         | Head lice                                                                                 | 2011             |
| Ceftaroline fosamil       | Cephalosporin                     | Glycopeptides; Cephalosporins                                                           | ND        | Skin and skin-structure infections; community acquired pneumonia                          | 2010             |
| Mifamurtide               | Muramyl dipeptide                 | Peptidoglycan                                                                           | ND        | anticancer                                                                                | 2010             |
| Cabazitaxel; Xrp-6258     | Taxol                             | Taxanes                                                                                 | ND        | Prostate cancer                                                                           | 2010             |
| Vinflunine                | Vincristine                       | Vinca alkaloids                                                                         | ND        | anticancer                                                                                | 2010             |
| Laninamivir octanoate     | N-Acetylneuraminic acid           | Sialic acids                                                                            | ND        | antiviral                                                                                 | 2010             |
| Fingolimod; Fty720        | Myriocin                          | Amino fatty acids                                                                       | ND        | Multiple sclerosis                                                                        | 2010             |
| Ulipristal                | Progesterone                      | Progestogens                                                                            | ND        | Contraception                                                                             | 2010             |
| Zucapsacin                | Capsaicin                         | Capsaicinoids                                                                           | ND        | osteoarthritis                                                                            | 2010             |
| Dalfampridine             | Pyridine                          | Pyridines                                                                               | ND        | Improving walking in patients with multiple sclerosis                                     | 2010             |
| 3,4-diaminopyridine       | Pyridine                          | Pyridines                                                                               | ND        | Lambert-Eaton Myasthenic Syndr                                                            | 2010             |

|                                                       |                                |                                                            |       |                                                                                             |      |
|-------------------------------------------------------|--------------------------------|------------------------------------------------------------|-------|---------------------------------------------------------------------------------------------|------|
| phosphate                                             |                                |                                                            |       |                                                                                             |      |
| Pazopanib; Gw-786034                                  | Zeatin                         | Purine analogues adenine-type                              | S/NM  | Renal cell carcinoma                                                                        | 2009 |
| Pitavastatin                                          | Mevastatin                     | Statins                                                    | S*/NM | Hyperlipidaemia and mixed dyslipidaemia                                                     | 2009 |
| Vigabatrin                                            | Gamma-aminobutyric acid (GABA) | Amino acids with acyclic hydroxyl side chain & derivatives | ND    | Infantile spasms in children aged 1 month to 2 years and complex partial seizures in adults | 2009 |
| Nalfurafine hcl                                       | Morphine                       | Opiate alkaloids                                           | ND    | uremic pruritis                                                                             | 2009 |
| Dronedaron hcl                                        | Khellin                        | Furanochromones                                            | ND    | Atrial fibrillation and atrial flutter                                                      | 2009 |
| Artemether; lumefantrine                              | Artemisinin                    | Trioxanes                                                  | ND    | Malaria                                                                                     | 2009 |
| Everolimus; Rad-001; Sdz rad                          | Sirolimus                      | Macrolides                                                 | ND    | Renal cell carcinoma                                                                        | 2009 |
| Pralatrexate                                          | Folic acid                     | Folate analogues                                           | ND    | Peripheral T cell lymphoma                                                                  | 2009 |
| Romidepsin                                            | Romidepsin                     | Depsipeptide cyclic structure                              | N     | Cutaneous T cell lymphoma                                                                   | 2009 |
| Ceftobiprole medocaril                                | Cephalosporin                  | Glycopeptides; Cephalosporins                              | ND    | Antibacterial                                                                               | 2008 |
| Methylnaltrexone bromide                              | Morphine                       | Opiate alkaloids                                           | ND    | Opioid-induced constipation                                                                 | 2008 |
| Desvenlafaxine                                        | Benzylamine                    | Benzylamines                                               | ND    | Major depressive disorder                                                                   | 2008 |
| Difluprednate                                         | Cortisol                       | Glucocorticoids                                            | ND    | Inflammation and pain associated with ocular surgery                                        | 2008 |
| Dienogest                                             | Progesterone                   | Progestogens                                               | ND    | endometriosis                                                                               | 2008 |
| Artesunate; Amodiaquine; Asaq                         | Artemisinin                    | Trioxanes                                                  | ND    | Antiparasitic                                                                               | 2008 |
| Artesunate; Amodiaquine; Asaq                         | Quinine                        | 5-aminoquinolines                                          | ND    | Antiparasitic                                                                               | 2008 |
| Sugammadex sodium                                     | γ-cyclodextrin                 | Cyclodextrins                                              | ND    | antidote                                                                                    | 2008 |
| Biolimus a9                                           | Rapamycin                      | Macrolides                                                 | ND    | restenosis                                                                                  | 2008 |
| Lapatinib; Lapatanib; Gw2016; Gsk572016               | Zeatin                         | Purine analogues adenine-type                              | S/NM  | Advanced or metastatic breast cancer                                                        | 2007 |
| Temsirolimus; Cci-779                                 | Sirolimus                      | Macrolides                                                 | ND    | Advanced renal cell carcinoma                                                               | 2007 |
| Nilotinib; Amn-107                                    | Staurosporine                  | Staurosporine alkaloids                                    | ND    | Chronic myelogenous leukaemia                                                               | 2007 |
| Sphingosomal topotecan; Inx-0076                      | Camptothecin                   | Camptothecin analogues                                     | ND    | Oncological disease                                                                         | 2007 |
| Ixabepilone; Bms-247550                               | Epothilone B                   | Polyketide macrolactones                                   | ND    | Advanced or metastatic breast cancer                                                        | 2007 |
| Doripenem; S-4661                                     | Thienamycin                    | Carbapenam                                                 | ND    | Urinary tract infections                                                                    | 2007 |
| Anidulafungin; Ver-002; V-echinocandin; Ly-303366     | Echinocandin B                 | Echinocandin-like lipopeptides    Echinocandins            | ND    | fungal infections                                                                           | 2007 |
| Retapamulin; Sb-275833                                | Pleuromutilin                  | Pleuromutilin scaffold                                     | ND    | Impetigo                                                                                    | 2007 |
| Fluticasone furoate                                   | Cortisol                       | Glucocorticoids                                            | ND    | antiallergic                                                                                | 2007 |
| Trabectedin; Ecteinascidin; Ecteinascidin-743; Et-743 | Trabectedin                    | Tetrahydroisoquinoline alkaloids                           | N     | Oncological disease                                                                         | 2007 |
| Lisdexamfetamine dimesylate                           | Lisdexamfetamine dimesylate    | Phenethylamine class                                       | ND    | ADHD                                                                                        | 2007 |
| Sunitinib malate; Su11248                             | Zeatin                         | Purine analogues adenine-type                              | S/NM  | Imatinib-resistant gastrointestinal stromal tumour and advanced renal cell carcinoma        | 2006 |
| Dasatinib                                             | Staurosporine                  | Staurosporine alkaloids                                    | S/NM  | Chronic myeloid leukaemia                                                                   | 2006 |
| Rotigotine                                            | Dopamine                       | Catecholamines                                             | S/NM  | Early stage idiopathic Parkinson's disease                                                  | 2006 |
| Darunavir; Tmc114                                     | Pepstatin                      | Hexa-peptide with                                          | S*/NM | HIV                                                                                         | 2006 |

|                                                            |                                       |                                                                     |       |                                                                                           |      |
|------------------------------------------------------------|---------------------------------------|---------------------------------------------------------------------|-------|-------------------------------------------------------------------------------------------|------|
|                                                            |                                       | unusual amino acid                                                  |       |                                                                                           |      |
| Decitabine                                                 | Deoxycytidine                         | Cytidine analogues                                                  | S*    | Myelodysplastic syndrome                                                                  | 2006 |
| Suberoylanilide hydroxamic acid (saha)                     | Trichostatin                          | Aniline dicarboxylic acids                                          | ND    | Cutaneous T-cell lymphoma                                                                 | 2006 |
| Anecortave acetate                                         | Cortisone                             | Steroid derivatives (Corticosteroids)                               | ND    | Macular degeneration                                                                      | 2006 |
| Lubiprostone                                               | Alprostadil                           | Prostaglandins                                                      | ND    | Constipation                                                                              | 2006 |
| Polyphenon e                                               | Polyphenon e                          | Catechins                                                           | N     | External genital and perianal warts                                                       | 2006 |
| Sorafenib                                                  | Zeatin                                | Purine analogues adenine-type                                       | S/NM  | Advanced renal cell carcinoma                                                             | 2005 |
| Clofarabine                                                | Adenosine                             | Purine nucleoside analogues                                         | S*    | Paediatric leukaemia                                                                      | 2005 |
| Entecavir                                                  | Deoxyguanosine                        | Purine nucleoside analogues                                         | S*    | Chronic hepatitis B virus infection                                                       | 2005 |
| Nelarabine                                                 | Guanosine                             | Purine nucleoside analogues                                         | S*    | T-cell acute lymphoblastic leukaemia and T-cell lymphoblastic lymphoma                    | 2005 |
| Tigecycline; Gar-936                                       | Tetracycline                          | Tetracyclines                                                       | ND    | Complicated skin and skin structure infections and complicated intra-abdominal infections | 2005 |
| Pralmorelin                                                | Growth hormone-releasing peptide      | Growth hormone-releasing hormone families                           | ND    | Treatment of GH deficiency                                                                | 2005 |
| Conjugated estrogens b                                     | Estrogen                              | Anabolic-androgenic steroids                                        | ND    | Hormone replacement therapy                                                               | 2005 |
| L-alanyl-l-glutamine                                       | Glutamine                             | Amino acids with acyclic hydroxyl side chain & derivatives          | ND    | Mucositis                                                                                 | 2005 |
| Ciclesonide                                                | Glucocorticoid                        | Glucocorticoids                                                     | ND    | Allergic rhinitis                                                                         | 2005 |
| Thc-cbd; Dronabinol; Cannabidiol; Gw-1000-02               | Tetrahydrocannabinol                  | Cannabinols                                                         | N     | Neurological disease                                                                      | 2005 |
| Omega-conotoxin mvIIa; Snx-III; Snx-111; C1002; Ziconotide | Omega-conotoxin MVIIA                 | Conotoxins                                                          | N     | Severe chronic pain                                                                       | 2005 |
| Fumagillin; Sr-90144                                       | Fumagillin                            | Bisabolane sesquiterpenes                                           | N     | Antiparasitic                                                                             | 2005 |
| Paclitaxel-albumin; Abi-007; Paclitaxel nanoparticles      | Paclitaxel                            | Taxanes                                                             | N     | Oncological disease                                                                       | 2005 |
| Erlotinib hydrochloride                                    | Zeatin                                | Purine analogues adenine-type                                       | S/NM  | Non-small-cell lung cancer                                                                | 2004 |
| Abarelix                                                   | Gonadotropin releasing hormone (GnRH) | Gonadotropin-releasing hormone family peptides                      | S*/NM | Advanced prostate cancer                                                                  | 2004 |
| Azacytidine                                                | Cytidine                              | Cytidine analogues                                                  | S*    | Myelodysplastic syndrome                                                                  | 2004 |
| Pemetrexed disodium                                        | Folic acid                            | Folate analogues                                                    | NM    | Malignant pleural mesothelioma                                                            | 2004 |
| Pregabalin                                                 | Gamma-aminobutyric acid (GABA)        | Amino acids with acyclic hydroxyl side chain & derivatives          | ND    | Diabetic peripheral neuropathy and post-herpetic neuralgia pain                           | 2004 |
| Talaporfin sodium                                          | Chlorin                               | Chlorins                                                            | ND    | anticancer                                                                                | 2004 |
| Telithromycin                                              | Erythromycin                          | Macrolides                                                          | ND    | Respiratory infections                                                                    | 2004 |
| Hexyl aminolevulinate                                      | Hexyl aminolevulinate                 | Amino acids with acyclic hydroxyl side chain & derivatives          | ND    | Anticancer                                                                                | 2004 |
| Vapreotide acetate                                         | Somatostatin                          | Somatostatin peptides ; GPCR targeting peptide hormones & analogues | ND    | Anticancer                                                                                | 2004 |



|                                                                 |                           |                                                 |       |                                                                                    |      |
|-----------------------------------------------------------------|---------------------------|-------------------------------------------------|-------|------------------------------------------------------------------------------------|------|
|                                                                 |                           | (cyclohexapeptides)                             |       |                                                                                    |      |
| Estradiol; Levonorgestrel                                       | Cholesterol               | Sterols                                         | ND    | Hormone replacement therapy                                                        | 2004 |
| Estradiol; Levonorgestrel                                       | Estradiol                 | Anabolic-androgenic steroids                    | ND    | Hormone replacement therapy                                                        | 2004 |
| Belotecan hydrochloride; Camptobell; Cdk-602                    | Camptothecin              | Camptothecin analogues                          | ND    | Oncological disease                                                                | 2004 |
| Apomorphine hydrochloride                                       | Morphine                  | Opiate alkaloids                                | N     | Parkinson's disease                                                                | 2004 |
| Atazanavir; Bms-232632                                          | Pepstatin                 | Hexa-peptide with unusual amino acid            | S*/NM | HIV                                                                                | 2003 |
| Fosamprenavir                                                   | Pepstatin                 | Hexa-peptide with unusual amino acid            | S*/NM | Antiviral                                                                          | 2003 |
| Vardenafil                                                      | Cyclic GMP                | Cyclic purine nucleotide                        | S*/NM | Erectile dysfunction                                                               | 2003 |
| Rosuvastatin calcium                                            | Mevastatin                | Statins                                         | S*/NM | Hypercholesterolaemia                                                              | 2003 |
| Tadalafil                                                       | Cyclic GMP                | Cyclic purine nucleotide                        | S*/NM | Erectile dysfunction                                                               | 2003 |
| Emtricitabine                                                   | Cytidine                  | Cytidine analogues                              | S*    | HIV                                                                                | 2003 |
| Miglustat; N-butyl-1-deoxyojirimycin                            | 1-deoxyojirimycin         | Imino sugars                                    | ND    | Gaucher's disease                                                                  | 2003 |
| Co-artemether; Artemether-lumofantrine; Artemether-lumefantrine | Artemisinin               | Trioxanes                                       | ND    | Antiparasitic                                                                      | 2003 |
| Epipodophyllotoxin                                              | Podophyllotoxin           | Podophyllotoxin lignans                         | ND    | Oncological disease                                                                | 2003 |
| Estradiol; Nomegestrol acetate                                  | Megestrol                 | Progestogens                                    | ND    | Hormone replacement therapy                                                        | 2003 |
| Isoprenaline                                                    | Amphetamine               | Phenethylamine class                            | ND    | Cardiovascular disease                                                             | 2003 |
| Isoprenaline                                                    | Ephedrine                 | Phenethylamine class                            | ND    | Cardiovascular disease                                                             | 2003 |
| Carbenoxolone; Cbx; Glycyrrhetic acid hydrogen succinate        | Glycyrrhizinic acid       | Triterpenoid saponin glycosides                 | ND    | Immunological, inflammatory and related disease                                    | 2003 |
| Drospirenone; Estradiol                                         | Cholesterol               | Sterols                                         | ND    | Hormone replacement therapy                                                        | 2003 |
| Drospirenone; Estradiol                                         | Estradiol                 | Anabolic-androgenic steroids                    | ND    | Hormone replacement therapy                                                        | 2003 |
| Mycophenolate sodium; Mycophenolic acid                         | Mycophenolic acid         | Mycophenolic acid analogues                     | N     | Immunological, inflammatory and related disease                                    | 2003 |
| Daptomycin; A21978c                                             | Daptomycin                | 13 residue Branched cyclic anionic lipopeptides | N     | Antibacterial                                                                      | 2003 |
| Gefitinib                                                       | Zeatin                    | Purine analogues adenine-type                   | S/NM  | Non-small-cell lung cancer                                                         | 2002 |
| Olmesartan medoxil                                              | Imidazole-5-acetic acid   | Imidazole analogues                             | S/NM  | Hypertension                                                                       | 2002 |
| Tiotropium bromide                                              | Atropine                  | Tropane alkaloids                               | S*/NM | Chronic obstructive pulmonary disease                                              | 2002 |
| Adefovir dipivoxil                                              | Adenosine monophosphate   | Purine nucleoside analogues                     | S*    | Chronic hepatitis B                                                                | 2002 |
| Sodium oxybate                                                  | Gamma-Hydroxybutyric acid | Carboxylic acid derivatives                     | ND    | Narcolepsy with episodes of cataplexy                                              | 2002 |
| Buprenorphine                                                   | Thebaine                  | Opiate alkaloids                                | ND    | Neurological disease                                                               | 2002 |
| Treprostinil sodium                                             | Prostacyclin              | Prostacyclins                                   | ND    | Pulmonary arterial hypertension                                                    | 2002 |
| Biapenem                                                        | Thienamycin               | Carbapenam                                      | ND    | Antibacterial                                                                      | 2002 |
| Etonogestrel; Ethinylestradiol                                  | Estradiol                 | Anabolic-androgenic steroids                    | ND    | Contraception                                                                      | 2002 |
| Micafungin sodium; Fk463                                        | FR901379                  | Echinocandin-like lipopeptides with with        | ND    | Candida infections in patients undergoing haematopoietic stem cell transplantation | 2002 |

|                                                 |                         | fatty acid side chain                                                                           |       |                                                                                                                     |      |
|-------------------------------------------------|-------------------------|-------------------------------------------------------------------------------------------------|-------|---------------------------------------------------------------------------------------------------------------------|------|
| Ertapenem sodium                                | Thienamycin             | Carbapenam                                                                                      | ND    | Moderate to severe bacterial infection                                                                              | 2002 |
| Eplerenone                                      | Corticosterone          | Corticosteroids                                                                                 | ND    | Hypertension                                                                                                        | 2002 |
| Fulvestrant; ICI-182, 780                       | Estrogen                | Anabolic-androgenic steroids                                                                    | ND    | Hormone-receptor-positive metastatic breast cancer                                                                  | 2002 |
| Amrubicin hydrochloride; Sm-5887                | Doxorubicin             | Anthracyclines                                                                                  | ND    | Oncological disease                                                                                                 | 2002 |
| Artesunate; As                                  | Artemisinin             | Trioxanes                                                                                       | ND    | Antiparasitic                                                                                                       | 2002 |
| Fondaparinux sodium                             | Heparin                 | Glycosaminoglycans                                                                              | ND    | DVT; anticoagulant                                                                                                  | 2002 |
| Acetyldigitoxin                                 | Digitoxin               | Cardiac glycosides                                                                              | ND    | Cardiovascular disease                                                                                              | 2002 |
| Galantamine hydrobromide; Galanthamine          | Galantamine             | Phenanthrene alkaloids                                                                          | N     | Neurological disease                                                                                                | 2002 |
| Morphine sulfate                                | Morphine                | Opiate alkaloids                                                                                | N     | Neurological disease                                                                                                | 2002 |
| Tegaserod maleate                               | Serotonin               | Tryptamines                                                                                     | S*/NM | Irritable bowel syndrome                                                                                            | 2001 |
| Valganciclovir                                  | Guanosine               | Purine nucleoside analogues                                                                     | S*    | Antiviral                                                                                                           | 2001 |
| Travoprost                                      | Prostaglandin F2alpha   | Prostaglandins                                                                                  | ND    | Antiglaucoma                                                                                                        | 2001 |
| Gusperimus trihydrochloride; 15-deoxyspergualin | Spergualin              | Peptoid core with guanidylated alkyl group and spermidine-derived polyamine                     | ND    | Immunological, inflammatory and related disease                                                                     | 2001 |
| Methacycline; Metacycline; Methacyclin          | Oxytetracycline         | Tetracyclines                                                                                   | ND    | Antibacterial                                                                                                       | 2001 |
| Norelgestromin; Ethinylestradiol                | Estradiol               | Anabolic-androgenic steroids                                                                    | ND    | Contraception                                                                                                       | 2001 |
| Minocycline hydrochloride; Minocycline          | Tetracycline            | Tetracyclines                                                                                   | ND    | Antibacterial                                                                                                       | 2001 |
| methyl aminolevulinate                          | Aminolevulinic acid HCl | Amino acids with acyclic hydroxyl side chain & derivatives                                      | ND    | Actinic keratoses                                                                                                   | 2001 |
| Bimatoprost                                     | Prostaglandin F2alpha   | Prostaglandins                                                                                  | ND    | Antiglaucoma                                                                                                        | 2001 |
| Falcalcitrol                                    | Calcitriol              | Secosteroids                                                                                    | ND    | Sec. hyperthyroidism                                                                                                | 2001 |
| Imatinib mesylate; Cgp5714b; Glivec; Stt571     | Staurosporine           | Staurosporine alkaloids                                                                         | ND    | Anticancer                                                                                                          | 2001 |
| Pimecrolimus; Sdz-asm-981; Ascomycin            | Ascomycin               | Macrolide lactones                                                                              | ND    | Immunological, inflammatory and related disease                                                                     | 2001 |
| Dutasteride                                     | Testosterone            | Anabolic-androgenic steroids                                                                    | ND    | BPH                                                                                                                 | 2001 |
| Fudosteine                                      | Cysteine                | Amino acid with acyclic sulfur-containing side chain                                            | ND    | expectorant                                                                                                         | 2001 |
| Caspofungin acetate                             | Echinocandin B          | Echinocandin-like lipopeptides    Echinocandins                                                 | ND    | antifungal                                                                                                          | 2001 |
| Rasburicase                                     | Urate oxidase           | EC1.7.3 Oxidoreductases acting on other nitrogenous compounds as donors with oxygen as acceptor | B*    | Management of plasma uric acid levels in paediatric patients with leukaemia, lymphoma and solid tumour malignancies | 2001 |
| Lopinavir; Abt-378                              | Pepstatin               | Hexa-peptide with unusual amino acid                                                            | S*/NM | Antiviral                                                                                                           | 2000 |
| Verteporfin                                     | Porphyrin               | Porphyryns                                                                                      | S*    | Photosensitizer                                                                                                     | 2000 |

|                                          |                                |                                                            |       |                                                                        |      |
|------------------------------------------|--------------------------------|------------------------------------------------------------|-------|------------------------------------------------------------------------|------|
| Bulaquine; Chloroquine                   | Quinine                        | 5-aminoquinolines                                          | S*    | Antiparasitic                                                          | 2000 |
| Drospirenone                             | Progestin                      | Progestogens                                               | ND    | Contraception                                                          | 2000 |
| Atosiban                                 | Oxytocin                       | Vasopressin and oxytocin families                          | ND    | Premature birth                                                        | 2000 |
| Trimegestone                             | Promegestone                   | Steroid derivatives (Norsteroids)                          | ND    | Hormone replacement therapy                                            | 2000 |
| Framycetin                               | Neomycin                       | Aminoglycosides                                            | ND    | Antibacterial                                                          | 2000 |
| Maxacalcitol                             | Cholecalciferol                | Secosteroids (structurally similar to steroids)            | ND    | calcium metabolism                                                     | 2000 |
| Ganirelix acetate                        | Gonadotropin-Releasing Hormone | Gonadotropin-releasing hormone family peptides             | ND    | Ovulation                                                              | 2000 |
| Gemtuzumab ozogamicin                    | Calicheamicin                  | Calicheamicins                                             | ND    | Oncological disease                                                    | 2000 |
| Medroxyprogesterone; Estradiol           | 17-hydroxyprogesterone         | Glucocorticoids                                            | ND    | Contraception                                                          | 2000 |
| Dosmalfate                               | Diosmin                        | Flavanone glycosides                                       | ND    | Gastroprotectant                                                       | 2000 |
| Taltirelin                               | Thyrotropin-Releasing Hormone  | Tri-peptide with an imidazole                              | ND    | CNS Stimulant                                                          | 2000 |
| Egualen sodium                           | Azulene                        | Benzenoid polycyclic aromatic hydrocarbons                 | ND    | antiulcer                                                              | 2000 |
| Arteether; Beta arteether                | Artemisinin                    | Trioxanes                                                  | ND    | Antiparasitic                                                          | 2000 |
| Aminolevulinic acid hci                  | Aminolevulinic acid hci        | Amino acids with acyclic hydroxyl side chain & derivatives | N     | Actinic keratoses                                                      | 2000 |
| Digoxin fab                              | Digoxin                        | Cardiac glycosides                                         | B     | Digoxin toxicity                                                       | 2000 |
| Telmisartan                              | Imidazole-5-acetic acid        | Imidazole analogues                                        | S/NM  | Antihypertensive agent                                                 | 1999 |
| Levalbuterol hci                         | Ephedrine                      | Phenethylamine class                                       | S*/NM | Immunological, inflammatory and related disease - Inflammatory disease | 1999 |
| Amprenavir                               | Pepstatin                      | Hexa-peptide with unusual amino acid                       | S*/NM | Antiviral                                                              | 1999 |
| Abacavir sulfate                         | Guanosine                      | Purine nucleoside analogues                                | S*    | Antiviral agent                                                        | 1999 |
| Nateglinide                              | D-phenylalanine                | $\alpha$ -amino acids                                      | S*    | Antidiabetic                                                           | 1999 |
| Kinetin                                  | Cytokinin                      | Purine analogues adenine-type                              | S*    | Skin photodamage                                                       | 1999 |
| Oseltamivir phosphate                    | N-Acetylneuraminic acid        | Sialic acids                                               | NM    | Influenza                                                              | 1999 |
| Zanamivir                                | N-Acetylneuraminic acid        | Sialic acids                                               | NM    | antiviral                                                              | 1999 |
| Valrubicin                               | Doxorubicin                    | Anthracyclines                                             | ND    | Antineoplastic agent                                                   | 1999 |
| Dalfopristin; Quinupristin               | Pristinamycin IA               | Streptogramins                                             | ND    | Antibacterial                                                          | 1999 |
| Dalfopristin; Quinupristin               | Pristinamycin IIA              | Romidepsin analogues                                       | ND    | Antibacterial                                                          | 1999 |
| Rapacuronium bromide                     | Dehydroepiandrosterone         | Anabolic-androgenic steroids                               | ND    | muscle relaxant                                                        | 1999 |
| Alitretinoin                             | Retinoid                       | Retinoids                                                  | ND    | Anticancer                                                             | 1999 |
| Exemestane                               | Androstenedione                | Androgens                                                  | ND    | Anticancer                                                             | 1999 |
| Melevodopa; Chf-1301; L-dopa-methylester | L-Dopa                         | Catecholamines                                             | ND    | Neurological disease - AntiParkinsonian                                | 1999 |
| Doxercalciferol                          | Ergosterol                     | Sterols                                                    | ND    | Calcium metabolism                                                     | 1999 |
| Conjugated estrogens a                   | Estrogen                       | Anabolic-androgenic steroids                               | ND    | Hormone replacement therapy                                            | 1999 |

|                                            |                         |                                      |       |                                                                        |      |
|--------------------------------------------|-------------------------|--------------------------------------|-------|------------------------------------------------------------------------|------|
| Colforsin daropate hcl                     | Forskolin               | Labdane diterpenes                   | ND    | Cardiovascular and metabolic disease                                   | 1999 |
| Sirolimus; Rapamycin                       | Sirolimus               | Macrolides                           | N     | Immunological, inflammatory and related disease                        | 1999 |
| Arglabin                                   | Arglabin                | Sesquiterpene lactones               | N     | Oncological disease                                                    | 1999 |
| Dermatan sulfate                           | Dermatan sulfate        | Glycosaminoglycans                   | B*    | DVT; anticoagulant                                                     | 1999 |
| Sildenafil citrate                         | Cyclic GMP              | Cyclic purine nucleotide             | S*/NM | Agent for erectile dysfunction                                         | 1998 |
| Rizatriptan benzoate                       | Serotonin               | Tryptamines                          | S*/NM | Agent for migraine Maxalt-MLT                                          | 1998 |
| Capecitabine                               | Uracil                  | Uracil analogues                     | S*    | Antineoplastic agent                                                   | 1998 |
| Paricalcitol                               | Calcitriol              | Secosteroids                         | ND    | Agent for secondary hyperparathyroidism                                | 1998 |
| Orlistat; Tetrahydrolipstatin              | Lipstatin               | Lipstatin analogues                  | ND    | Cardiovascular and metabolic disease                                   | 1998 |
| Cefoselis                                  | Cephalosporin           | Glycopeptides;<br>Cephalosporins     | ND    | Antibacterial                                                          | 1998 |
| Levonorgestrel; Ethinyl estradiol          | Cholesterol             | Sterols                              | ND    | Contraception                                                          | 1998 |
| Loteprednol etabonate                      | Cortisol                | Glucocorticoids                      | ND    | Agent for ocular inflammatory conditions                               | 1998 |
| Bemiparin sodium                           | Heparin                 | Glycosaminoglycans                   | ND    | DVT; anticoagulant                                                     | 1998 |
| Miglitol                                   | 1-deoxynojirimycin      | Imino sugars                         | ND    | Cardiovascular and metabolic disease                                   | 1998 |
| Dihydroartemisinin                         | Artemisinin             | Trioxanes                            | ND    | Antiparasitic                                                          | 1998 |
| Alprostadil                                | Alprostadil             | Prostaglandins                       | N     | Erectile dysfunction                                                   | 1998 |
| Eprosartan                                 | Imidazole-5-acetic acid | Imidazole analogues                  | S/NM  | Antihypertensive                                                       | 1997 |
| Irbesartan                                 | Imidazole-5-acetic acid | Imidazole analogues                  | S/NM  | Antihypertensive                                                       | 1997 |
| Candesartan cilexetil                      | Imidazole-5-acetic acid | Imidazole analogues                  | S/NM  | Antihypertensive agent                                                 | 1997 |
| Neflinavir mesylate; Nelfinavir mesylate   | Pepstatin               | Hexa-peptide with unusual amino acid | S*/NM | Antiviral                                                              | 1997 |
| Atorvastatin calcium; Atorvastatin calcium | Mevastatin              | Statins                              | S*/NM | Cardiovascular disease                                                 | 1997 |
| Flurithromycin ethylsuccinate              | Erythromycin            | Macrolides                           | ND    | Antibacterial                                                          | 1997 |
| Mezlocillin                                | Penicillin              | Penicillins                          | ND    | Antibacterial                                                          | 1997 |
| Cefcapene pivoxil                          | Cephalosporin           | Glycopeptides;<br>Cephalosporins     | ND    | Antibacterial                                                          | 1997 |
| Faropenem sodium; Fropenam                 | Thienamycin             | Carbapenam                           | ND    | Antibacterial                                                          | 1997 |
| Cefaclor; Cefachlor; Cefaclorum            | Cephalosporin           | Glycopeptides;<br>Cephalosporins     | ND    | Antibacterial                                                          | 1997 |
| Hesperetin                                 | Hesperetin              | Flavanones                           | N     | Cardiovascular disease                                                 | 1997 |
| Ephedrine                                  | Ephedrine               | Phenethylamine class                 | N     | Immunological, inflammatory and related disease - Inflammatory disease | 1997 |
| Tandospirone                               | Serotonin               | Tryptamines                          | S/NM  | Anxiolytic                                                             | 1996 |
| Valsartan                                  | Imidazole-5-acetic acid | Imidazole analogues                  | S/NM  | Antihypertensive                                                       | 1996 |
| Sertindole                                 | Serotonin               | Tryptamines                          | S*/NM | Neuroleptic                                                            | 1996 |
| Ropinirole hcl                             | Serotonin               | Tryptamines                          | S*/NM | AntiParkinsonian                                                       | 1996 |
| Ritonavir                                  | Pepstatin               | Hexa-peptide with unusual amino acid | S*/NM | Antiviral                                                              | 1996 |
| Ramosetron                                 | Serotonin               | Tryptamines                          | S*/NM | Antiemetic                                                             | 1996 |
| Indinavir sulfate; Idv                     | Pepstatin               | Hexa-peptide with unusual amino acid | S*/NM | Antiviral                                                              | 1996 |

|                                  |                                 |                                                                                                  |       |                             |      |
|----------------------------------|---------------------------------|--------------------------------------------------------------------------------------------------|-------|-----------------------------|------|
| Cidofovir                        | Cytidine monophosphate          | Cytidine analogues                                                                               | S*    | Antiviral                   | 1996 |
| Penciclovir                      | Guanine                         | Purine analogues<br>guanine-type                                                                 | S*    | Antiviral                   | 1996 |
| Zotatolimimus; Abt-578           | Sirolimus                       | Macrolides                                                                                       | ND    | Oncological disease         | 1996 |
| Latanoprost                      | Prostaglandin<br>F2alpha        | Prostaglandins                                                                                   | ND    | Antiglaucoma                | 1996 |
| Oxycodone hcl                    | Thebaine                        | Opiate alkaloids                                                                                 | ND    | Neurological disease        | 1996 |
| Oxycodone hcl                    | Codeine                         | Opiate alkaloids                                                                                 | ND    | Neurological disease        | 1996 |
| Topotecan hcl                    | Camptothecin                    | Camptothecin<br>analogues                                                                        | ND    | Oncological disease         | 1996 |
| Flutamide                        | Testosterone                    | Anabolic-androgenic<br>steroids                                                                  | ND    | Oncological disease         | 1996 |
| Etoposide phosphate              | Podophyllotoxin                 | Podophyllotoxin lignans                                                                          | ND    | Oncological disease         | 1996 |
| Zinc hyaluronate                 | Hyaluronan                      | Glycosaminoglycans                                                                               | ND    | Vulnerary                   | 1996 |
| Captopril; Sq14225; Capropril    | Teprotide                       | Nonapeptides                                                                                     | ND    | Cardiovascular disease      | 1996 |
| Amodiaquine; Sq                  | Chloroquine                     | 4-Aminoquinolines                                                                                | ND    | Antiparasitic               | 1996 |
| Certoparin sodium                | Heparin                         | Glycosaminoglycans                                                                               | ND    | DVT; anticoagulant          | 1996 |
| Raltitrexed                      | Folic acid                      | Folate analogues                                                                                 | ND    | cancers                     | 1996 |
| Prezotide copper acetate         | Prezotide copper<br>acetate     | Tri-peptide with a<br>imidazole                                                                  | N     | Vulnerary                   | 1996 |
| Betain anhydrous                 | Trimethylglycine                | Amino acids with acyclic<br>hydroxyl side chain &<br>derivatives                                 | N     | Homocystinuria              | 1996 |
| Digitoxin                        | Digitoxin                       | Cardiac glycosides                                                                               | N     | Cardiovascular disease      | 1996 |
| Thymalfasin                      | Thymosin alpha 1                | Thymosins (28aa<br>peptides)                                                                     | B*    | Hepatitis                   | 1996 |
| Fosfomycin tromethamine          | Fosfomycin<br>tromethamine      | Phosphoenolpyruvate<br>analogues                                                                 | N     | urinary tract infections    | 1996 |
| Moexipril hci                    | Teprotide                       | Nonapeptides                                                                                     | S*/NM | Cardiovascular disease      | 1995 |
| Spirapril hci                    | Teprotide                       | Nonapeptides                                                                                     | S*/NM | Cardiovascular disease      | 1995 |
| Saquinavir mesylate              | Pepstatin                       | Hexa-peptide with<br>unusual amino acid                                                          | S*/NM | Antiviral                   | 1995 |
| Valaciclovir hcl                 | Guanosine                       | Purine nucleoside<br>analogues                                                                   | S*    | Antiviral                   | 1995 |
| Gemcitabine hcl                  | Cytidine                        | Cytidine analogues                                                                               | S*    | Anticancer                  | 1995 |
| Lamivudine                       | Zalcitabine                     | Cytidine analogues                                                                               | S*    | Antiviral                   | 1995 |
| Rimexolone                       | Cortisol                        | Glucocorticoids                                                                                  | ND    | Inflammatory disease        | 1995 |
| Docetaxel                        | Paclitaxel                      | Taxanes                                                                                          | ND    | Oncological disease         | 1995 |
| Lanreotide                       | Somatostatin                    | Somatostatin peptides ;<br>GPCR targeting peptide<br>hormones & analogues<br>(cyclohexapeptides) | ND    | Acromegaly                  | 1995 |
| Nalmefene hci                    | Naltrexone                      | Opiate alkaloids                                                                                 | ND    | Neurological disease        | 1995 |
| Estrogens;<br>Medroxyproesterone | Estrogen                        | Anabolic-androgenic<br>steroids                                                                  | ND    | Hormone replacement therapy | 1995 |
| Tirilazad mesylate               | Cortisol                        | Glucocorticoids                                                                                  | ND    | subarachnoid hemorrhage     | 1995 |
| Alendronate sodium               | 2-aminoethylphosph<br>onic acid | Aminodiphosphonates                                                                              | ND    | calcium metabolism          | 1995 |
| Cefozopran hcl                   | Cephalosporin                   | Glycopeptides;<br>Cephalosporins                                                                 | ND    | Antibacterial               | 1995 |

|                                  |                         |                                                            |       |                                                                                                         |      |
|----------------------------------|-------------------------|------------------------------------------------------------|-------|---------------------------------------------------------------------------------------------------------|------|
| Mycophenolate mofetil            | Mycophenolic acid       | Mycophenolic acid analogues                                | ND    | Immunological, inflammatory and related disease                                                         | 1995 |
| Carperitide                      | Carperitide             | Natriuretic peptides                                       | N     | Congestive heart failure                                                                                | 1995 |
| Tramadol hydrochloride           | Tramadol                | Small alkaloids with an amine group                        | N     | moderate to moderately severe pain                                                                      | 1995 |
| Losartan potassium               | Imidazole-5-acetic acid | Imidazole analogues                                        | S/NM  | Antihypertensive                                                                                        | 1994 |
| Fluvastatin sodium               | Mevastatin              | Statins                                                    | S*/NM | Cardiovascular disease                                                                                  | 1994 |
| Temocapril hydrochloride         | Teprotide               | Nonapeptides                                               | S*/NM | Cardiovascular disease                                                                                  | 1994 |
| Stavudine                        | Thymidine               | Thymidine analogues                                        | S*    | Antiviral                                                                                               | 1994 |
| Famciclovir                      | Guanine                 | Purine analogues guanine-type                              | S*    | Antiviral                                                                                               | 1994 |
| Quinagolide hydrochloride        | Ergoline                | Ergoline alkaloids                                         | NM    | antihyperprolactinemia                                                                                  | 1994 |
| Rocuronium bromide               | Steroid                 | Steroid derivatives (aminosteroids)                        | ND    | Muscle relaxant                                                                                         | 1994 |
| Docarpamine                      | Dopamine                | Catecholamines                                             | ND    | Cardiotonic                                                                                             | 1994 |
| Zinostatin stimalamer            | Neocarzinostatin        | Enediynes                                                  | ND    | Oncological disease                                                                                     | 1994 |
| Salmeterol                       | Adrenaline              | Catecholamines                                             | ND    | Immunological, inflammatory and related disease - Inflammatory disease                                  | 1994 |
| Salmeterol                       | Ephedrine               | Phenethylamine class                                       | ND    | Immunological, inflammatory and related disease - Inflammatory disease                                  | 1994 |
| Unoprostone isopropyl            | Prostaglandin           | Prostaglandins                                             | ND    | Antiglaucoma                                                                                            | 1994 |
| Polaprezinc                      | Carnosine               | Di-peptide with a imidazole                                | ND    | Antiulcer                                                                                               | 1994 |
| Trimetrexate glucuronate         | Folic acid              | Folate analogues                                           | ND    | PCP/Toxoplasmosis                                                                                       | 1994 |
| Vinorelbine; Vrlb; Navelvine     | Vinorelbine             | Vinca alkaloids                                            | ND    | Oncological disease                                                                                     | 1994 |
| Meropenem                        | Thienamycin             | Carbapenam                                                 | ND    | Antibacterial                                                                                           | 1994 |
| Cefditoren pivoxil               | Cephalosporin           | Glycopeptides; Cephalosporins                              | ND    | Antibacterial                                                                                           | 1994 |
| Panipenem; Betamipron            | Thienamycin             | Carbapenam                                                 | ND    | Antibacterial                                                                                           | 1994 |
| Irinotecan hydrochloride; Cpt-11 | Camptothecin            | Camptothecin analogues                                     | ND    | Oncological disease                                                                                     | 1994 |
| Camptothecin; Irinotecan         | Camptothecin            | Camptothecin analogues                                     | ND    | Oncological disease                                                                                     | 1994 |
| Betamethasone butyrate propion   | Prednisolone            | Glucocorticoids                                            | ND    | Antiinflammatory                                                                                        | 1994 |
| Angiotensin ii                   | Angiotensin ii          | Dipsogen oligopeptides                                     | N     | Anticancer                                                                                              | 1994 |
| Voglibose; Ao-128                | Voglibose               | Imino sugars                                               | N     | Cardiovascular and metabolic disease                                                                    | 1994 |
| Cysteamine bitartrate            | Cysteine                | Amino acid with acyclic sulfur-containing side chain       | ND    | escape the metabolic defect in cystinosis and cystinuria, also used for treatment of radiation sickness | 1994 |
| Imidapril hci                    | Teprotide               | Nonapeptides                                               | S*/NM | Cardiovascular disease                                                                                  | 1993 |
| Trandolapril                     | Teprotide               | Nonapeptides                                               | S*/NM | Cardiovascular disease                                                                                  | 1993 |
| Sorivudine                       | Thymidine               | Thymidine analogues                                        | S*    | Antiviral                                                                                               | 1993 |
| Gabapentin                       | GABA                    | Amino acids with acyclic hydroxyl side chain & derivatives | S*    | Antiepileptic                                                                                           | 1993 |
| Piperacillin; Tazobactam         | Penicillin              | Penicillins                                                | ND    | Antibacterial                                                                                           | 1993 |
| Tretinoin                        | Vitamin A               | Ionone polyisoprene                                        | ND    | Antiulcer                                                                                               | 1993 |
| Dirithromycin                    | Erythromycin            | Macrolides                                                 | ND    | Antibacterial                                                                                           | 1993 |

|                                          |                     |                                      |       |                                                   |      |
|------------------------------------------|---------------------|--------------------------------------|-------|---------------------------------------------------|------|
| Miltefosine                              | Phosphatidylcholine | Phospholipids (Phosphatidylcholines) | ND    | anticancer                                        | 1993 |
| Cefepime                                 | Cephalosporin       | Glycopeptides; Cephalosporins        | ND    | Antibacterial                                     | 1993 |
| Cladribine                               | Purine              | Purine                               | ND    | Anticancer                                        | 1993 |
| Formestane                               | Estrogen            | Anabolic-androgenic steroids         | ND    | Anticancer                                        | 1993 |
| Ecabet sodium                            | Abietic acid        | Abietane diterpenes                  | ND    | antiulcer                                         | 1993 |
| Parnaparin sodium                        | Heparin             | Glycosaminoglycans                   | ND    | DVT; anticoagulant                                | 1993 |
| Cabergoline                              | Ergot               | Ergoline alkaloids                   | ND    | Antihyperprolactinemia                            | 1993 |
| Reviparin sodium                         | Heparin             | Glycosaminoglycans                   | ND    | Anticoagulant                                     | 1993 |
| Tacalcitol                               | Ergosterol          | Sterols                              | ND    | Antipsoriatic                                     | 1993 |
| Paclitaxel                               | Paclitaxel          | Taxanes                              | N     | Oncological disease                               | 1993 |
| Tacrolimus; Fk-506; Fujimycin            | Tacrolimus          | Macrolide lactones                   | N     | Immunological, inflammatory and related disease   | 1993 |
| Calcipotriene                            | Calcitriol          | Secosteroids                         | ND    | psoriasis                                         | 1993 |
| Atovaquone                               | Ubiquinone          | Quinone isoprenes                    | S*    | Antiparasitic                                     | 1992 |
| Zalcitabine; Ddc; Ddcyd; Dideoxycytidine | Pyrimidine          | Pyrimidine analogues                 | S*    | Antiviral                                         | 1992 |
| Teniposide; Vm-26                        | Podophyllotoxin     | Podophyllotoxin lignans              | ND    | Oncological disease                               | 1992 |
| Tazobactam sodium                        | Penicillin          | Penicillins                          | ND    | Antibacterial                                     | 1992 |
| Finasteride                              | Testosterone        | Anabolic-androgenic steroids         | ND    | 5 alpha-reductase inhibitor                       | 1992 |
| Danaparoid sodium                        | Heparin             | Glycosaminoglycans                   | ND    | DVT; anticoagulant                                | 1992 |
| Loracarbef                               | Cephalosporin       | Glycopeptides; Cephalosporins        | ND    | Antibacterial                                     | 1992 |
| Iloprost                                 | Prostacyclin PGI2   | Prostacyclins                        | ND    | Pulmonary arterial hypertension                   | 1992 |
| Cefetamet pivoxil hcl                    | Cephalosporin       | Glycopeptides; Cephalosporins        | ND    | Antibacterial                                     | 1992 |
| Beraprost sodium                         | Prostacyclin        | Prostacyclins                        | ND    | Platelet aggreg. inhib.                           | 1992 |
| Cefprozil; Cefproxil                     | Cephalosporin       | Glycopeptides; Cephalosporins        | ND    | Antibacterial                                     | 1992 |
| Cefpirome sulfate                        | Cephalosporin       | Glycopeptides; Cephalosporins        | ND    | Antibacterial                                     | 1992 |
| Ceftibuten                               | Cephalosporin       | Glycopeptides; Cephalosporins        | ND    | Antibacterial                                     | 1992 |
| Sapropterin dihydrochloride              | Sapropterin         | Purine analogues                     | ND    | Hyperphenylalaninaemia                            | 1992 |
| Andrographolide                          | Andrographolide     | Labdane diterpenes                   | N     | Antibacterial - Chemotherapy: Bacillary dysentery | 1992 |
| Pentostatin; Deoxycoformycin             | Pentostatin         | Purine nucleoside analogues          | N     | Oncological disease                               | 1992 |
| Masoprocol                               | Masoprocol          | Catechols & derivatives              | N     | Oncological disease                               | 1992 |
| Aldesleukin                              | IL2                 | Interleukins                         | B*    | Anticancer                                        | 1992 |
| Teceleukin                               | IL2                 | Interleukins                         | B*    | Anticancer                                        | 1992 |
| Celmoleukin                              | IL2 + mAb           | Interleukins                         | B*    | Anticancer                                        | 1992 |
| Fosinopril sodium                        | Teprotide           | Nonapeptides                         | S*/NM | Cardiovascular disease                            | 1991 |
| Sumatriptan succinate                    | Serotonin           | Tryptamines                          | S*/NM | Antimigraine                                      | 1991 |
| Didanosine; 2',3'-dideoxyinosine; Ddi    | Purine              | Purine                               | S*    | Antiviral                                         | 1991 |

|                                |                         |                                                            |       |                                                                        |      |
|--------------------------------|-------------------------|------------------------------------------------------------|-------|------------------------------------------------------------------------|------|
| Fludarabine phosphate          | Adenosine monophosphate | Purine nucleoside analogues                                | S*    | Anticancer                                                             | 1991 |
| Halobetasol propionate         | Glucocorticoid          | Glucocorticoids                                            | ND    | Antiinflammatory                                                       | 1991 |
| Cefotiam hexetil hydrochloride | Cephalosporin           | Glycopeptides; Cephalosporins                              | ND    | Antibacterial                                                          | 1991 |
| Nitisinone; Ntbc               | Leptospermone           | $\beta$ -triketones                                        | ND    | Hereditary tyrosinaemia type 1                                         | 1991 |
| Cefdinir                       | Cephalosporin           | Glycopeptides; Cephalosporins                              | ND    | Antibacterial agent                                                    | 1991 |
| Arteflene; Ro 42-1611          | Yingzhaosu A            | Sesquiterpene Peroxides                                    | ND    | Antiparasitic                                                          | 1991 |
| Calcipotriol                   | Calcitriol              | Secosteroids                                               | ND    | Antipsoriatic                                                          | 1991 |
| Oxacillin sodium               | Penicillin              | Penicillins                                                | ND    | Antibacterial                                                          | 1991 |
| Argatroban                     | L-arginine              |                                                            | S*/NM | Antithrombotic                                                         | 1990 |
| Salmeterol xinafoate           | Ephedrine               | Phenethylamine class                                       | S*/NM | Immunological, inflammatory and related disease - Inflammatory disease | 1990 |
| Remoxipride hydrochloride      | Dopamine                | Catecholamines                                             | S*/NM | Antipsychotic                                                          | 1990 |
| Cilazapril                     | Teprotide               | Nonapeptides                                               | S*/NM | Cardiovascular disease                                                 | 1990 |
| Benazepril hydrochloride       | Teprotide               | Nonapeptides                                               | S*/NM | Cardiovascular disease                                                 | 1990 |
| Idarubicin hydrochloride       | Daunorubicin            | Anthracyclines                                             | ND    | Oncological disease                                                    | 1990 |
| Eflornithine hcl               | Ornithine               | Amino acids with acyclic hydroxyl side chain & derivatives | ND    | antiparasitic                                                          | 1990 |
| Cefodizime sodium              | Cephalosporin           | Glycopeptides; Cephalosporins                              | ND    | Antibacterial                                                          | 1990 |
| Clarithromycin                 | Erythromycin            | Macrolides                                                 | ND    | Antibacterial                                                          | 1990 |
| Arbekacin                      | Kanamycin               | Aminoglycosides                                            | ND    | Antibacterial                                                          | 1990 |
| Fluticasone propionate         | Fluticasone             | Glucocorticoids                                            | ND    | Inflammatory disease                                                   | 1990 |
| Ethyl icosapentate             | Eicosapentaenoic acid   | Leukotrienes                                               | ND    | Antithrombotic                                                         | 1990 |
| Pumactant                      | Monocrotaline           | Pyrrrolizidine alkaloids                                   | ND    | respiratory distress syndrome                                          | 1990 |
| Capsaicin; Algrx 4975          | Capsaicin               | Capsaicinoids                                              | N     | Neurological disease                                                   | 1990 |
| Acarbose                       | Acarbose                | Acarviosin maltose                                         | N     | Cardiovascular and metabolic disease                                   | 1990 |
| Ramipril                       | Teprotide               | Nonapeptides                                               | S*/NM | Cardiovascular disease                                                 | 1989 |
| Droxidopa                      | L-serine                | Amino acids with acyclic hydroxyl side chain & derivatives | S*/NM | AntiParkinsonian                                                       | 1989 |
| Dopexamine                     | Dopamine                | Catecholamines                                             | S*/NM | Cardiotonic                                                            | 1989 |
| Delapril                       | Teprotide               | Nonapeptides                                               | S*/NM | Cardiovascular disease                                                 | 1989 |
| Quinapril                      | Teprotide               | Nonapeptides                                               | S*/NM | Cardiovascular disease                                                 | 1989 |
| Ethanolamine oleate            | Oleic acid              | Monounsaturated omega-9 fatty acids                        | S*    | Sclerosant                                                             | 1989 |
| Acamprosate calcium            | GABA                    | Amino acids with acyclic hydroxyl side chain & derivatives | S*    | Alcohol dependence                                                     | 1989 |
| Cefmetazole sodium             | Cephamicin nucleus      | Cephalosporins                                             | ND    | Antibacterial                                                          | 1989 |
| Cefpodoxime proxetil           | Cephalosporin           | Glycopeptides; Cephalosporins                              | ND    | Antibacterial                                                          | 1989 |
| Tiopronin                      | Glycine                 | Amino acids with acyclic hydroxyl side chain &             | ND    | Urolithiasis                                                           | 1989 |



|                                        |                                              |                                                                                         |       |                        |      |
|----------------------------------------|----------------------------------------------|-----------------------------------------------------------------------------------------|-------|------------------------|------|
|                                        |                                              | derivatives                                                                             |       |                        |      |
| Deslorelin                             | Gonadotropin-releasing hormone (triptorelin) | Gonadotropin-releasing hormone family decapeptides                                      | ND    | Oncological disease    | 1989 |
| Lmw heparin                            | Heparin                                      | Glycosaminoglycans                                                                      | ND    | Anticoagulant          | 1989 |
| Ipriflavone                            | Isoflavone                                   | Isoflavones                                                                             | ND    | Calcium metabolism     | 1989 |
| Acitretin                              | Retinoid                                     | Retinoids                                                                               | ND    | Antipsoriatic          | 1989 |
| Rv-11                                  | Erythromycin                                 | Macrolides                                                                              | N     | Antibacterial          | 1989 |
| Pravastatin                            | Mevastatin                                   | Statins                                                                                 | N     | Cardiovascular disease | 1989 |
| Solamargine                            | Solamargine                                  | Solasodine glycoalkaloids                                                               | N     | Oncological disease    | 1989 |
| Adenosine                              | Adenosine                                    | Purine nucleoside analogues                                                             | N     | Antiarrhythmic         | 1989 |
| Interleukin-2                          | Interleukin-2                                | Interleukins                                                                            | B*    | Anticancer             | 1989 |
| Denopamine                             | Dopamine                                     | Catecholamines                                                                          | S*/NM | Cardiotonic            | 1988 |
| Alacepril                              | Teprotide                                    | Nonapeptides                                                                            | S*/NM | Cardiovascular disease | 1988 |
| Perindopril                            | Teprotide                                    | Nonapeptides                                                                            | S*/NM | Cardiovascular disease | 1988 |
| Epervudine                             | Deoxyuridine                                 | Uridine analogues                                                                       | S*    | Antiviral              | 1988 |
| Ganciclovir                            | Guanosine                                    | Purine nucleoside analogues                                                             | S*    | Antiviral              | 1988 |
| Azithromycin                           | Erythromycin                                 | Macrolides                                                                              | ND    | Antibacterial          | 1988 |
| Octreotide                             | Somatostatin                                 | Somatostatin peptides ; GPCR targeting peptide hormones & analogues (cyclohexapeptides) | ND    | Antisecretory          | 1988 |
| Hydrocortisone aceponate               | Hydrocortisone                               | Glucocorticoids                                                                         | ND    | Antiinflammatory       | 1988 |
| Pirarubicin                            | Doxorubicin                                  | Anthracyclines                                                                          | ND    | Oncological disease    | 1988 |
| Pergolide mesylate                     | Ergoline                                     | Ergoline alkaloids                                                                      | ND    | AntiParkinsonian       | 1988 |
| Secalciferol                           | Cholecalciferol                              | Secosteroids (structurally similar to steroids)                                         | ND    | calcium metabolism     | 1988 |
| Limaprost                              | Alprostadi                                   | Prostaglandins                                                                          | ND    | Antithrombotic         | 1988 |
| Mifepristone                           | Glucocorticoid                               | Glucocorticoids                                                                         | ND    | Abortifacient          | 1988 |
| Tibolone                               | Tibolone                                     | Anabolic steroids                                                                       | ND    | Anabolic metabolism    | 1988 |
| Isepamicin                             | Gentamicin                                   | Aminoglycosides                                                                         | ND    | Antibacterial          | 1988 |
| Propentofylline propionate             | Xanthine                                     | Purine analogues xanthine-type                                                          | ND    | Vasodilator; cerebral  | 1988 |
| Halopredone acetate                    | Glucocorticoid                               | Glucocorticoids                                                                         | ND    | Antiarthritic          | 1988 |
| Flomoxef sodium                        | Cephalosporin                                | Glycopeptides; Cephalosporins                                                           | ND    | Antibacterial          | 1988 |
| Flutropium bromide                     | Atropine                                     | Tropane alkaloids                                                                       | ND    | Antitussive            | 1988 |
| Erythromycin acistrate; Cas 96128-89-1 | Erythromycin                                 | Macrolides                                                                              | ND    | Antibacterial          | 1988 |
| Choline alfoscerate                    | Choline alfoscerate                          | Choline alfoscerate                                                                     | ND    | Nootropic              | 1988 |
| Carumonam                              | Aztreonam                                    | Penicillins                                                                             | ND    | Antibacterial          | 1988 |
| Simvastatin; Simvastin                 | Mevastatin                                   | Statins                                                                                 | N     | Cardiovascular disease | 1988 |
| Midecamycin                            | Midecamycin                                  | Macrolides                                                                              | N     | Antibiotic             | 1988 |
| Fosfomycin trometamol                  | Fosfomycin                                   | Phosphoenolpyruvate                                                                     | N     | Antibacterial          | 1988 |

|                                                                        | trometamol                     | analogueues                                    |       |                                                                   |      |
|------------------------------------------------------------------------|--------------------------------|------------------------------------------------|-------|-------------------------------------------------------------------|------|
| Josamycin                                                              | Josamycin                      | Macrolides                                     | N     | Antibacterial                                                     | 1988 |
| Gamolenic acid                                                         | Gamolenic acid                 | Leukotrienes                                   | N     | Antiallergic                                                      | 1988 |
| Enalaprilat                                                            | Teprotide                      | Nonapeptides                                   | S*/NM | Cardiovascular disease                                            | 1987 |
| Lisinopril                                                             | Teprotide                      | Nonapeptides                                   | S*/NM | Cardiovascular disease                                            | 1987 |
| Eptazocine hbr                                                         | Morphine                       | Opiate alkaloids                               | S*    | Analgesic                                                         | 1987 |
| Zidovudine; Zdv; Azt;<br>Azidothymidine;<br>3'-azido-3'-deoxythymidine | Thymidine                      | Thymidine analogues                            | S*    | Antiviral                                                         | 1987 |
| Doxifluridine                                                          | Uridine                        | Uridine analogues                              | S*    | Anticancer                                                        | 1987 |
| Goserelin                                                              | Gonadotropin-releasing hormone | Gonadotropin-releasing hormone family peptides | ND    | Oncological disease                                               | 1987 |
| Hidrosmín                                                              | Dicoumarol                     | 4-Hydroxycoumarins                             | ND    | Cardiovascular disease                                            | 1987 |
| Lenampicillin hci                                                      | Penicillin                     | Penicillins                                    | ND    | Antibacterial                                                     | 1987 |
| Sultamicillin tosilate                                                 | Penicillin                     | Penicillins                                    | ND    | Antibacterial                                                     | 1987 |
| Cefteram pivoxil                                                       | Cephalosporin                  | Glycopeptides;<br>Cephalosporins               | ND    | Antibacterial                                                     | 1987 |
| Cefixime                                                               | Cephalosporin                  | Glycopeptides;<br>Cephalosporins               | ND    | Antibacterial                                                     | 1987 |
| Roxithromycin                                                          | Erythromycin                   | Macrolides                                     | ND    | Antibacterial                                                     | 1987 |
| Cefminox sodium                                                        | Cephalosporin                  | Glycopeptides;<br>Cephalosporins               | ND    | Antibacterial                                                     | 1987 |
| Enoxaparin                                                             | Heparin                        | Glycosaminoglycans                             | ND    | DVT; anticoagulant                                                | 1987 |
| Metergolin                                                             | Ergoline                       | Ergoline alkaloids                             | ND    | Antihyperprolactinemia                                            | 1987 |
| Gestodene; Ethinylestradiol                                            | Estradiol                      | Anabolic-androgenic steroids                   | ND    | Contraception                                                     | 1987 |
| Mometasone furoate                                                     | Mometasone                     | Glucocorticoids                                | ND    | Antiinflammatory                                                  | 1987 |
| Aspoxicillin                                                           | Penicillin                     | Penicillins                                    | ND    | Antibacterial                                                     | 1987 |
| Cefuzonam sodium                                                       | Cephalosporin                  | Glycopeptides;<br>Cephalosporins               | ND    | Antibacterial                                                     | 1987 |
| Cefuroxime axetil                                                      | Cephalosporin                  | Glycopeptides;<br>Cephalosporins               | ND    | Antibacterial                                                     | 1987 |
| Artemether                                                             | Artemisinin                    | Trioxanes                                      | ND    | Antiparasitic                                                     | 1987 |
| Ornoprostil                                                            | Alprostadil                    | Prostaglandins                                 | ND    | Antiulcer                                                         | 1987 |
| Cefpimizole                                                            | Cephalosporin                  | Glycopeptides;<br>Cephalosporins               | ND    | Antibacterial                                                     | 1987 |
| Ganglioside gm1                                                        | Ganglioside gm1                | Gangliosides                                   | N     | Antithrombotic                                                    | 1987 |
| Ivermectin                                                             | Ivermectin                     | Avermectins                                    | N     | Antiparasitic                                                     | 1987 |
| Bucillamine                                                            | Penicillin                     | Penicillins                                    | N     | Immunomodulator                                                   | 1987 |
| Lovastatin; Mevinolin                                                  | Lovastatin                     | Statins                                        | N     | Cardiovascular disease                                            | 1987 |
| Plaunotol                                                              | Plaunotol                      | Acyclic diterpene                              | N     | Antiulcer                                                         | 1987 |
| Ubenimex                                                               | Ubenimex                       | Phenethylamine class                           | N     | Immunological, inflammatory and related disease - Immunostimulant | 1987 |
| Artemisinin; Qinghaosu                                                 | Artemisinin                    | Trioxanes                                      | N     | Antiparasitic                                                     | 1987 |
| Hyaluronate sodium                                                     | Hyaluronate sodium             | Glycosaminoglycans                             | B*    | Joint lubricant                                                   | 1987 |
| Ursodiol                                                               | Ursodiol                       | Steroid derivatives (steroid acids)            | N     | metabolic byproducts of intestinal bacteria                       | 1987 |
| Cefmenoxime hydrochloride                                              | Cephalosporin                  | $\beta$ -lactams                               | ND    | antibiotic                                                        | 1987 |

|                                              |                                |                                                            |    |                                                                                              |      |
|----------------------------------------------|--------------------------------|------------------------------------------------------------|----|----------------------------------------------------------------------------------------------|------|
| Ticarcillin; Clavulanate                     | Penicillin                     | Penicillins                                                | ND | Antibacterial                                                                                | 1986 |
| Sulbactam sodium                             | Penicillin                     | Penicillins                                                | ND | Beta-lactamase inhibitor                                                                     | 1986 |
| Brovincamine fumarate                        | Vincamine                      | Monoterpenoid indole alkaloids                             | ND | Vasodilator, cerebral                                                                        | 1986 |
| Rokitamycin                                  | Midecamycin                    | Macrolides                                                 | ND | Antibacterial                                                                                | 1986 |
| Levacecarnine hci                            | Lysine                         | Amino acids with acyclic hydroxyl side chain & derivatives | ND | Nootropic                                                                                    | 1986 |
| Nomegestrol acetate                          | Megestrol                      | Progestogens                                               | ND | Progestogen                                                                                  | 1986 |
| Triptorelin                                  | Gonadotropin-releasing hormone | Gonadotropin-releasing hormone family peptides             | ND | Oncological disease                                                                          | 1986 |
| Gestrinone                                   | Estrogen                       | Anabolic-androgenic steroids                               | ND | Antiprogestogenic                                                                            | 1986 |
| Prednicarbate                                | Prednisolone                   | Glucocorticoids                                            | ND | Inflammatory disease                                                                         | 1986 |
| Deflazacort                                  | Glucocorticoid                 | Glucocorticoids                                            | ND | Antiinflammatory                                                                             | 1986 |
| Gonadoreline-6-d-trp acetate                 | Gonadotropin-releasing hormone | Gonadotropin-releasing hormone family peptides             | ND | Oncological disease                                                                          | 1986 |
| Norgestimate                                 | Norgestrel                     | Progestogens                                               | ND | Progestogen                                                                                  | 1986 |
| Idebenone                                    | Coenzyme Q10                   | Quinone isoprenes                                          | ND | nootropic                                                                                    | 1986 |
| Schizophyllan                                | Schizophyllan                  | $\beta$ -Glucans                                           | N  | Immunological, inflammatory and related disease - Immunostimulant                            | 1986 |
| Thc; Dronabinol; Delta9-tetrahydrocannabinol | Tetrahydrocannabinol           | Cannabinols                                                | N  | Neurological disease                                                                         | 1986 |
| Lentinan                                     | Lentinan                       | $\beta$ -Glucans                                           | N  | Oncological disease                                                                          | 1986 |
| Mupirocin                                    | Mupirocin                      | Polyketide-derived acids with a long tail                  | N  | Antibacterial                                                                                | 1986 |
| Tranexamic acid                              | Lysine                         | Amino acids with acyclic hydroxyl side chain & derivatives | ND | treat or prevent excessive blood loss during surgery and in various other medical conditions | 1986 |
| Progabide                                    | Gamma-aminobutyric acid (GABA) | Amino acids with acyclic hydroxyl side chain & derivatives | S* | Anticonvulsant                                                                               | 1985 |
| Imipenem; Cilastatin                         | Thienamycin                    | Carbapenam                                                 | ND | Antibacterial                                                                                | 1985 |
| Alclometasone dipropionate                   | Methylprednisolone             | Glucocorticoids                                            | ND | Inflammatory disease                                                                         | 1985 |
| Cefbuperazone sodium                         | Cephalosporin                  | Glycopeptides; Cephalosporins                              | ND | Antibacterial                                                                                | 1985 |
| Cefpiramide sodium                           | Cephalosporin                  | Glycopeptides; Cephalosporins                              | ND | Antibacterial                                                                                | 1985 |
| Rosaprostol                                  | Prostaglandin E                | Prostaglandins                                             | ND | Antiulcer                                                                                    | 1985 |
| Nabumetone                                   | Indole-3-acetic acid           | Auxins                                                     | ND | antiinflammatory                                                                             | 1985 |
| Imipenem                                     | Thienamycin                    | Carbapenam                                                 | ND | Antibacterial                                                                                | 1985 |
| Beta-acetyldigoxin                           | Digoxin                        | Cardiac glycosides                                         | ND | Cardiovascular disease                                                                       | 1985 |
| Haem arginate                                | Heme                           | Porphyrins                                                 | ND | porphyria                                                                                    | 1985 |
| Cefoxitin sodium                             | Cephamicin nucleus             | Cephalosporins                                             | ND | Antibacterial                                                                                | 1985 |
| Mefloquine hci                               | Quinine                        | 5-aminoquinolines                                          | ND | Antiparasitic                                                                                | 1985 |
| Enprostil                                    | Prostaglandin E2               | Prostaglandins                                             | ND | Antiulcer                                                                                    | 1985 |
| Nadroparin calcium                           | Heparin                        | Glycosaminoglycans                                         | ND | Anticoagulant                                                                                | 1985 |
| Dalteparin sodium                            | Heparin                        | Glycosaminoglycans                                         | ND | DVT; anticoagulant                                                                           | 1985 |
| Misoprostol                                  | Alprostadi                     | Prostaglandins                                             | ND | Antiulcer                                                                                    | 1985 |

|                                         |                                |                                                            |       |                                                                                                  |      |
|-----------------------------------------|--------------------------------|------------------------------------------------------------|-------|--------------------------------------------------------------------------------------------------|------|
| Doxofylline                             | Theophylline                   | Purine analogues xanthine-type                             | ND    | Bronchodilator                                                                                   | 1985 |
| Cimetropium bromide                     | Scopolamine                    | Tropane alkaloids                                          | ND    | Antispasmodic                                                                                    | 1985 |
| Miokamycin; Miocamycin; Mom             | Midecamycin                    | Macrolides                                                 | N     | Antibacterial                                                                                    | 1985 |
| Astromycin sulfate                      | Astromycin sulfate             | Aminoglycosides                                            | N     | antibacterial                                                                                    | 1985 |
| Podophyllotoxin; Podofilox              | Podophyllotoxin                | Podophyllotoxin lignans                                    | N     | Antiviral                                                                                        | 1985 |
| Amiodarone hydrochloride                | Khellin                        | Furanochromones                                            | ND    | antiarrhythmic agent                                                                             | 1985 |
| Levocarnitine                           | Lysine                         | Amino acids with acyclic hydroxyl side chain & derivatives | ND    | nutritional supplement                                                                           | 1985 |
| Levocarnitine                           | Methionine                     | Amino acid with acyclic sulfur-containing side chain       | ND    | nutritional supplement                                                                           | 1985 |
| Enalapril maleate                       | Teprotide                      | Nonapeptides                                               | S*/NM | Cardiovascular disease                                                                           | 1984 |
| Mitoxantrone hci                        | Doxorubicin                    | Anthracyclines                                             | S*    | Oncological disease                                                                              | 1984 |
| Fosfosal                                | Salicylic acid                 | Monohydroxybenzoic acids                                   | S*    | Analgesic                                                                                        | 1984 |
| Nafcillin                               | Penicillin                     | Penicillins                                                | ND    | Antibacterial                                                                                    | 1984 |
| Temocillin disodium                     | Penicillin                     | Penicillins                                                | ND    | Antibacterial                                                                                    | 1984 |
| Buserelin acetate                       | Gonadotropin-releasing hormone | Gonadotropin-releasing hormone family peptides             | ND    | Oncological disease                                                                              | 1984 |
| Sofalcone                               | Sophoradin                     | Chalconoids                                                | ND    | Antiulcer                                                                                        | 1984 |
| Nicorandil                              | Niacinamide                    | Pyridine alkaloids                                         | ND    | Vasodilator; coronary                                                                            | 1984 |
| Teprenone                               | Coenzyme Q10                   | Quinone isoprenes                                          | ND    | Antiulcer                                                                                        | 1984 |
| Naltrexone hci                          | Thebaine                       | Opiate alkaloids                                           | ND    | Neurological disease                                                                             | 1984 |
| Ceforanide                              | Cephalosporin                  | Glycopeptides; Cephalosporins                              | ND    | Antibacterial                                                                                    | 1984 |
| Cefonicid sodium; Cefonicide; Cefonicid | Cephalosporin                  | Glycopeptides; Cephalosporins                              | ND    | Antibacterial                                                                                    | 1984 |
| Ibopamine hci                           | Dopamine                       | Catecholamines                                             | ND    | Cardiotonic                                                                                      | 1984 |
| Epirubicin hci                          | Doxorubicin                    | Anthracyclines                                             | ND    | Oncological disease                                                                              | 1984 |
| Cefotetan                               | Cephamicin nucleus             | Cephalosporins                                             | ND    | Antibacterial                                                                                    | 1984 |
| Leuprolide acetate                      | Gonadotropin-releasing hormone | Gonadotropin-releasing hormone family peptides             | ND    | Oncological disease                                                                              | 1984 |
| Amoxicillin; Clavulanic acid            | Penicillin                     | Penicillins                                                | ND    | Antibacterial                                                                                    | 1984 |
| Melinamide                              | Linoleic acid                  | Unsaturated long chain fatty acid analogues                | ND    | hypocholesterolemic                                                                              | 1984 |
| Nicotine                                | Nicotine                       | Nicotine alkaloids                                         | N     | Insecticide                                                                                      | 1984 |
| Papaverine                              | Papaverine                     | Benzylisoquinoline alkaloids                               | N     | Neurological disease                                                                             | 1984 |
| Mizoribine                              | Mizoribine                     | Imidazole nucleosides                                      | N     | Immunological, inflammatory and related disease                                                  | 1984 |
| Pentoxifylline                          | Xanthine                       | Purine analogues xanthine-type                             | ND    | intermittent claudication resulting from obstructed arteries in the limbs, and vascular dementia | 1984 |
| Betaxolol hci                           | Isoprenaline                   | Catecholamines                                             | S*/NM | Cardiovascular disease                                                                           | 1983 |
| Enocitabine                             | Cytidine                       | Cytidine analogues                                         | S*    | Anticancer                                                                                       | 1983 |
| Celiprolol hcl                          | Epinephrine                    | Catecholamines                                             | S*    | Antihypertensive                                                                                 | 1983 |

|                                                                             |                         |                                          |    |                                                                           |      |
|-----------------------------------------------------------------------------|-------------------------|------------------------------------------|----|---------------------------------------------------------------------------|------|
| Befunolol hci                                                               | Epinephrine             | Catecholamines                           | S* | Antiglaucoma                                                              | 1983 |
| Promegestone                                                                | Progestin               | Progestogens                             | ND | Progestogen                                                               | 1983 |
| Halometasone                                                                | Betamethasone           | Glucocorticoids                          | ND | Inflammatory disease                                                      | 1983 |
| Hydrocortisone butyrate                                                     | Hydrocortisone          | Glucocorticoids                          | ND | Inflammatory disease                                                      | 1983 |
| Oxitropium bromide                                                          | Scopolamine             | Tropane alkaloids                        | ND | Bronchodilator                                                            | 1983 |
| Epoprostenol sodium                                                         | Epoprostenol sodium     | Prostacyclins                            | ND | Platelet aggreg. inhib.                                                   | 1983 |
| Gemeprost                                                                   | Alprostadiol            | Prostaglandins                           | ND | Abortifacient                                                             | 1983 |
| Ceftazidime pentahydrate                                                    | Cephalosporin           | Glycopeptides;<br>Cephalosporins         | ND | Antibacterial                                                             | 1983 |
| Elliptinium acetate                                                         | Ellipticine             | Ellipticine alkaloids                    | ND | Oncological disease                                                       | 1983 |
| Sodium cellulose po4                                                        | Cellulose               | Polysaccharides                          | ND | hypocalciuric                                                             | 1983 |
| Ciclosporin; Cyclosporine;<br>Cyclosporin; Ciclosporin a;<br>Cyclosporine a | Cyclosporine            | Nonribosomal peptide<br>cyclic structure | N  | Immunological, inflammatory and related<br>disease                        | 1983 |
| (+)-catechin                                                                | (+)-catechin            | Catechins                                | N  | Haemostatic                                                               | 1983 |
| Restasis                                                                    | Ciclosporin             | Nonribosomal peptide<br>cyclic structure | N  | Keratoconjunctivitis sicca (chronic dry eye<br>disease)                   | 1983 |
| Chenodiol                                                                   | Chenodiol               | Steroid derivatives<br>(steroid acids)   | N  | Anticholelithogenic                                                       | 1983 |
| Moxalactam disodium;<br>Latamoxef                                           | Cephamicin<br>nucleus   | Cephalosporins                           | ND | Antibacterial                                                             | 1982 |
| Ceftriaxone sodium                                                          | Cephalosporin           | Glycopeptides;<br>Cephalosporins         | ND | Antibacterial                                                             | 1982 |
| Dextromethorphan; Dxm; Dm                                                   | Codeine                 | Opiate alkaloids                         | ND | Neurological disease - Antitussive                                        | 1982 |
| Vecuronium bromide                                                          | Steroid                 | Steroid derivatives<br>(aminosteroids)   | ND | Muscle relaxant                                                           | 1982 |
| Apalcillin sodium                                                           | Penicillin              | Penicillins                              | ND | Antibacterial                                                             | 1982 |
| Ceftizoxime sodium                                                          | Cephalosporin           | Glycopeptides;<br>Cephalosporins         | ND | Antibacterial                                                             | 1982 |
| Lisuride maleate                                                            | Ergot                   | Ergoline alkaloids                       | ND | Antihyperprolactinemia                                                    | 1982 |
| Nabilone                                                                    | Tetrahydrocannabinol    | Cannabinols                              | ND | Neurological disease                                                      | 1982 |
| Micronomicin sulfate                                                        | Micronomicin<br>sulfate | Aminoglycosides                          | N  | Antibacterial                                                             | 1982 |
| Extract of serenoa repens                                                   | β-Sitosterol            | Sterols                                  | N  | Benign prostatic hypertrophy                                              | 1982 |
| Chloramphenicol                                                             | Chloramphenicol         | Chloramphenicol<br>alkaloids             | N  | Antibacterial                                                             | 1982 |
| Isotretinoin; Isotrentoin                                                   | Vitamin A               | Ionone polyisoprene                      | N  | Antiacne                                                                  | 1982 |
| Indoramin hcl                                                               | Tryptophol              | Tryptamines                              | S* | Antihypertensive                                                          | 1981 |
| Carmofur                                                                    | Uracil                  | Uracil analogues                         | S* | Anticancer                                                                | 1981 |
| Inosine pranobex                                                            | Inosine                 | Purine nucleoside<br>analogues           | S* | Antiviral                                                                 | 1981 |
| Salbutamol; Albuterol                                                       | Adrenaline              | Catecholamines                           | ND | Immunological, inflammatory and related<br>disease - Inflammatory disease | 1981 |
| Salbutamol; Albuterol                                                       | Ephedrine               | Phenethylamine class                     | ND | Immunological, inflammatory and related<br>disease - Inflammatory disease | 1981 |
| Atenolol                                                                    | Isoprenaline            | Catecholamines                           | ND | Cardiovascular disease                                                    | 1981 |
| Budesonide                                                                  | Glucocorticoid          | Glucocorticoids                          | ND | Antiasthmatic                                                             | 1981 |
| Cefotiam hcl                                                                | Cephalosporin           | Glycopeptides;<br>Cephalosporins         | ND | Antibacterial                                                             | 1981 |

|                                          |                     |                               |    |                                                            |      |
|------------------------------------------|---------------------|-------------------------------|----|------------------------------------------------------------|------|
| Sulprostone                              | Dinoprostone        | Prostaglandins                | ND | Abortifacient                                              | 1981 |
| Desogestrel; Ethinylestradiol            | Estradiol           | Anabolic-androgenic steroids  | ND | Contraception                                              | 1981 |
| Cefamandole nafate; Cephmandole          | Cephalosporin       | Glycopeptides; Cephalosporins | ND | Antibacterial                                              | 1981 |
| Ceftiofur                                | Cephalosporin       | Glycopeptides; Cephalosporins | ND | Antibacterial                                              | 1981 |
| Cefotaxime sodium                        | Cephalosporin       | Glycopeptides; Cephalosporins | ND | Antibacterial                                              | 1981 |
| Cefoperazone sodium                      | Cephalosporin       | Glycopeptides; Cephalosporins | ND | Antibacterial                                              | 1981 |
| Amikacin                                 | Kanamycin           | Aminoglycosides               | ND | Antibacterial                                              | 1981 |
| Peplomycin                               | Bleomycin           | Peptide-polyketides           | N  | Oncological disease                                        | 1981 |
| Paromomycin sulfate                      | Paromomycin sulfate | Aminoglycosides               | N  | Antibacterial                                              | 1981 |
| Aclarubicin                              | Aclarubicin         | Anthracyclines                | N  | Oncological disease                                        | 1981 |
| Toposar; Vp-16                           | Podophyllotoxin     | Podophyllotoxin lignans       | ND | Oncological disease                                        | 1980 |
| Ribavirin                                | Showdomycin         | Imidazole ribosides           | ND | Antiviral                                                  | 1980 |
| Cefsulodin                               | Cephalosporin       | Glycopeptides; Cephalosporins | ND | Antibiotic                                                 | 1980 |
| Terbutyline                              | Epinephrine         | Catecholamines                | ND | Antihypertensive                                           | 1980 |
| Estramustine                             | Cholesterol         | Sterols                       | ND | Antineoplastic                                             | 1980 |
| Estramustine                             | Estradiol           | Anabolic-androgenic steroids  | ND | Antineoplastic                                             | 1980 |
| Cefadroxil; Cefadroxil hemihydrate       | Cephalosporin       | Glycopeptides; Cephalosporins | ND | Antibacterial                                              | 1980 |
| Alpha-acetyldigoxin                      | Digoxin             | Cardiac glycosides            | ND | Cardiovascular disease                                     | 1980 |
| Yohimbine                                | Yohimbine           | Yohimbine alkaloids           | N  | Aphrodisiac                                                | 1980 |
| Xanthotoxin; Ammoidin; 8-methoxypsoralen | Methoxsalen         | Furanocoumarins               | N  | Leukoderma, Vitiligo                                       | 1980 |
| Vasicine; Peganine                       | Vasicine            | Quinazoline alkaloids         | N  | Oxytocic                                                   | 1980 |
| Theobromine                              | Theobromine         | Purine analogues              | N  | Vasodilator, Diuretic                                      | 1980 |
| Stevioside                               | Stevioside          | Steviol glycosides            | N  | Sweetener                                                  | 1980 |
| Silymarin                                | Silymarin           | Flavanones                    | N  | Antihepatotoxic                                            | 1980 |
| Santonin                                 | Santonin            | Sesquiterpene lactones        | N  | Anthelmintic - Ascaricide                                  | 1980 |
| Sanguinarine                             | Sanguinarine        | Benzylisoquinoline alkaloids  | N  | Dental plaque inhibitor                                    | 1980 |
| Huperzine; Huperzine a                   | Huperzine a         | Sesquiterpene alkaloids       | N  | Neurological disease                                       | 1980 |
| Nalbuphine                               | Thebaine            | Opiate alkaloids              | ND | Neurological disease                                       | 1979 |
| Cyclacillin                              | Penicillanic acid   | Penicillins                   | ND | Antibiotic                                                 | 1979 |
| Vindesine; Vds                           | Vinblastine         | Vinca alkaloids               | ND | Oncological disease                                        | 1979 |
| Scopolamine                              | Scopolamine         | Tropane alkaloids             | N  | Immunological, inflammatory and related disease - Sedative | 1979 |
| Gentamicin                               | Gentamicin          | Aminoglycosides               | N  | Antibacterial                                              | 1979 |
| Metoprolol tartrate                      | Isoprenaline        | Catecholamines                | ND | Cardiovascular disease                                     | 1978 |
| Natamycin; Pimaricin                     | Natamycin           | Macrolides                    | N  | Antifungal                                                 | 1978 |
| Rutin                                    | Rutin               | Flavonol rutinose             | N  | Capillary fragility                                        | 1978 |
| Rotenone                                 | Rotenone            | Rotenoids                     | N  | Piscicide                                                  | 1978 |

|                                      |                           |                                                                       |   |                                                                        |      |
|--------------------------------------|---------------------------|-----------------------------------------------------------------------|---|------------------------------------------------------------------------|------|
| Rorifone                             | Rorifone                  | Rorifone analogues                                                    | N | Antitussive                                                            | 1978 |
| Picrotoxin                           | Picrotoxin                | Morphinans                                                            | N | Analeptic                                                              | 1978 |
| Palmitine; Filiraurine               | Palmitine                 | Protoberberine alkaloids                                              | N | Antipyretic, Detoxicant                                                | 1978 |
| Pachycarpine; (+)-sparteine          | Pachycarpine              | Lupin alkaloid containing a tetracyclic bis-quinolizidine ring system | N | Oxytocic                                                               | 1978 |
| Nordihydroguaiaretic acid            | Nordihydroguaiaretic acid | Catechols & derivatives                                               | N | Antioxidant                                                            | 1978 |
| Menthol                              | Menthol                   | Monocyclic monoterpenes                                               | N | Rubefacient                                                            | 1978 |
| Khellin                              | Khellin                   | Furanochromones                                                       | N | Bronchodilator                                                         | 1978 |
| Hyoscyamine                          | Hyoscyamine               | Tropane alkaloids                                                     | N | Anticholinergic                                                        | 1978 |
| Hydrastine                           | Hydrastine                | Phthalideisoquinoline alkaloids                                       | N | Haemostatic, Astringent                                                | 1978 |
| Hesperidin                           | Hesperidin                | Flavanone glycosides                                                  | N | Capillary fragility                                                    | 1978 |
| Glycyrrhizin; Glycyrrhetic acid      | Glycyrrhizic acid         | Triterpenoid saponin glycosides                                       | N | Sweetener, Addison's disease                                           | 1978 |
| Glaziovine; Glasiovine               | Glaziovine                | Proaporphine alkaloids                                                | N | Antidepressant                                                         | 1978 |
| Glaucine                             | Glaucine                  | Isoquinoline alkaloids                                                | N | Antitussive                                                            | 1978 |
| Danthron; 1,8-dihydroxy-antraquinone | Danthron                  | Anthraquinones                                                        | N | Laxative                                                               | 1978 |
| Cynarin                              | Cynarin                   | Hydroxycinnamates                                                     | N | Choleretic                                                             | 1978 |
| Camphor                              | Camphor                   | Cyclic ketones of the hydroaromatic terpene group                     | N | Rubefacient                                                            | 1978 |
| Asiaticoside                         | Asiaticoside              | Triterpenoid glycosides                                               | N | Vulnerary                                                              | 1978 |
| Arecoline                            | Arecoline                 | Arecoline alkaloids                                                   | N | Anthelmintic - Chemotherapy                                            | 1978 |
| Anisodine                            | Anisodine                 | Tropane alkaloids                                                     | N | Anticholinergic                                                        | 1978 |
| Anisodamine                          | Anisodamine               | Tropane alkaloids                                                     | N | Anticholinergic                                                        | 1978 |
| Allyl isothiocyanate                 | Allyl isothiocyanate      | Isothiocyanates                                                       | N | Rubefacient                                                            | 1978 |
| Allantoin                            | Allantoin                 | Diazole urea                                                          | N | Vulnerary                                                              | 1978 |
| Ajmalicine                           | Ajmalicine                | Yohimbine alkaloids                                                   | N | Circulatory disorders                                                  | 1978 |
| Agrimophol                           | Agrimophol                | Phloroglucinol derivatives                                            | N | Anthelmintic - Chemotherapy                                            | 1978 |
| Vincamine                            | Vincamine                 | Monoterpenoid indole alkaloids                                        | N | Cerebral stimulant                                                     | 1978 |
| Strychnine                           | Strychnine                | Strychnine alkaloids                                                  | N | Neurological disease                                                   | 1978 |
| Thymol                               | Thymol                    | Monoterpene phenols                                                   | N | Antifungal - Chemotherapy: Antifungal                                  | 1978 |
| Neoandrographolide                   | Neoandrographolide        | Diterpene lactones                                                    | N | Antibacterial - Chemotherapy: Bacillary dysentery                      | 1978 |
| Berberine                            | Berberine                 | Protoberberine alkaloids                                              | N | Antibacterial - Chemotherapy: Bacillary dysentery                      | 1978 |
| Salicin                              | Salicin                   | Benzyl alcohol $\beta$ -glucosides                                    | N | Immunological, inflammatory and related disease - Analgesic            | 1978 |
| Aescin                               | Aescin                    | Saponins                                                              | N | Immunological, inflammatory and related disease - Inflammatory disease | 1978 |
| Rescinnamine                         | Rescinnamine              | Rauwolfia alkaloids                                                   | N | Cardiovascular disease                                                 | 1978 |
| Kawain                               | Kawain                    | Chalconoids                                                           | N | Cardiovascular disease                                                 | 1978 |
| Lanatoside c                         | Lanatoside c              | Cardiac glycosides                                                    | N | Cardiovascular disease                                                 | 1978 |

|                                       |                               |                                              |    |                                                                                                                                                    |      |
|---------------------------------------|-------------------------------|----------------------------------------------|----|----------------------------------------------------------------------------------------------------------------------------------------------------|------|
| Lanatoside b                          | Lanatoside b                  | Cardiac glycosides                           | N  | Cardiovascular disease                                                                                                                             | 1978 |
| Lanatoside a                          | Lanatoside a                  | Cardiac glycosides                           | N  | Cardiovascular disease                                                                                                                             | 1978 |
| Digitalin                             | Digitalin                     | Cardiac glycosides                           | N  | Cardiovascular disease                                                                                                                             | 1978 |
| Deslanoside                           | Deslanoside                   | Cardiac glycosides                           | N  | Cardiovascular disease                                                                                                                             | 1978 |
| Convallatoxin                         | Convallatoxin                 | Cardiac glycosides                           | N  | Cardiovascular disease                                                                                                                             | 1978 |
| Ouabain; G-strophanthin               | Ouabain                       | Cardiac glycosides                           | N  | Cardiovascular disease                                                                                                                             | 1978 |
| Sennoside b                           | Sennoside b                   | Anthraquinones                               | N  | Cardiovascular disease                                                                                                                             | 1978 |
| Sennoside a                           | Sennoside a                   | Anthraquinones                               | N  | Cardiovascular disease                                                                                                                             | 1978 |
| Demecolcine                           | Demecolcine                   | Colchicine alkaloids                         | N  | Oncological disease - Chemotherapy:<br>Antitumor agent                                                                                             | 1978 |
| Colchicine amide                      | Colchicine amide              | Colchicine alkaloids                         | N  | Oncological disease - Chemotherapy:<br>Antitumor agent                                                                                             | 1978 |
| Monocrotaline                         | Monocrotaline                 | Pyrrrolizidine alkaloids                     | N  | Oncological disease - Antitumor agent                                                                                                              | 1978 |
| (+)-tetrahydropalmatine;<br>Rotundine | Rotundine                     | Isoquinoline alkaloids                       | N  | Immunological, inflammatory and related<br>disease - Analgesic; Sedative; Tranquillizer                                                            | 1978 |
| Calcitriol                            | Calcitriol                    | Secosteroids                                 | N  | increasing the uptake of calcium from the<br>gut into the blood, and (2) possibly<br>increasing the release of calcium into the<br>blood from bone | 1978 |
| Bromocriptine mesylate                | Ergoline                      | Ergoline alkaloids                           | ND | pituitary tumors, Parkinson's disease (PD),<br>hyperprolactinaemia, neuroleptic malignant<br>syndrome, and type 2 diabetes                         | 1978 |
| Azlocillin                            | Penicillin                    | Penicillins                                  | ND | Antibacterial                                                                                                                                      | 1977 |
| Ipratropium; Ipratropium<br>bromide   | Tiotropium                    | Tiotropium alkaloids                         | ND | Anticholinergic                                                                                                                                    | 1977 |
| Dinoprostone                          | Prostaglandin E2              | Prostaglandins                               | N  | vaginal suppository                                                                                                                                | 1977 |
| Dextroamphetamine sulfate             | Amphetamine                   | Phenethylamine class                         | ND | ADHD; narcolepsy                                                                                                                                   | 1976 |
| Cefalexin; Cephalexin                 | Cephalosporin                 | Glycopeptides;<br>Cephalosporins             | ND | Antibacterial                                                                                                                                      | 1976 |
| Theophylline                          | Theophylline                  | Purine analogues<br>xanthine-type            | N  | respiratory diseases                                                                                                                               | 1976 |
| Candicidin                            | Candicidin                    | Heptaenic macrolides                         | N  | Antifungal                                                                                                                                         | 1976 |
| Neocarzinostatin                      | Neocarzinostatin              | Eneidyines                                   | N  | Oncological disease                                                                                                                                | 1976 |
| VIDARABINE                            | Spongouridine                 | Uridine analogues                            | S* | Antiviral                                                                                                                                          | 1976 |
| VIDARABINE                            | Spongothymidine               | Cytosine analog (with an<br>arabinose sugar) | S* | Antiviral                                                                                                                                          | 1976 |
| Bacampicillin                         | Penicillin                    | Penicillins                                  | ND | Antibacterial                                                                                                                                      | 1975 |
| Tobramycin sulfate                    | Tobramycin sulfate            | Aminoglycosides                              | N  | Antibacterial                                                                                                                                      | 1975 |
| Betamethasone dipropionate            | Betamethasone<br>dipropionate | Glucocorticoids                              | N  | Anti-inflammatory                                                                                                                                  | 1975 |
| Pseudoephedrine                       | Pseudoephedrine               | Phenethylamine class                         | N  | Immunological, inflammatory and related<br>disease - Sympathomimetic                                                                               | 1975 |
| Triptolide                            | Triptolide                    | Diterpenoid epoxide                          | N  | Immunological, inflammatory and related<br>disease                                                                                                 | 1975 |
| Eupatilin                             | Eupatilin                     | O-methylated flavones                        | N  | Immunological, inflammatory and related<br>disease                                                                                                 | 1975 |
| Digoxin; Digitalis                    | Digoxin                       | Cardiac glycosides                           | N  | Cardiovascular disease                                                                                                                             | 1975 |
| Cefradine; Cephadrine                 | Cephalosporin                 | Glycopeptides;<br>Cephalosporins             | ND | Antibacterial                                                                                                                                      | 1974 |
| Cloxacillin; Cloxacillin sodium       | Penicillin                    | Penicillins                                  | ND | Antibacterial                                                                                                                                      | 1974 |



|                                                                     |                                   |                                  |    |                                                                                                                                                                                                      |      |
|---------------------------------------------------------------------|-----------------------------------|----------------------------------|----|------------------------------------------------------------------------------------------------------------------------------------------------------------------------------------------------------|------|
| Cefapirin; Cephapirin                                               | Cephalosporin                     | Glycopeptides;<br>Cephalosporins | ND | Antibacterial                                                                                                                                                                                        | 1974 |
| Methyltestosterone                                                  | Testosterone                      | Anabolic-androgenic<br>steroids  | ND | Oncological disease                                                                                                                                                                                  | 1974 |
| Amoxicillin; Amoxycillin                                            | Penicillin                        | Penicillins                      | ND | Antibacterial                                                                                                                                                                                        | 1974 |
| Betamethasone sodium<br>phosphate                                   | Betamethasone<br>sodium phosphate | Glucocorticoids                  | N  | Anti-inflammatory                                                                                                                                                                                    | 1974 |
| Dopamine hydrochloride                                              | Dopamine<br>hydrochloride         | Catecholamines                   | N  | Neurological disease                                                                                                                                                                                 | 1974 |
| L-dopa                                                              | L-Dopa                            | Catecholamines                   | N  | Neurological disease - AntiParkinsonism                                                                                                                                                              | 1974 |
| Calusterone                                                         | Methyltestosterone                | Anabolic-androgenic<br>steroids  | ND | Oncological disease                                                                                                                                                                                  | 1973 |
| Acetylcholine chloride                                              | Acetylcholine<br>chloride         | Choline acetic acid              | N  | Neurological disease                                                                                                                                                                                 | 1973 |
| Kanamycin                                                           | Kanamycin                         | Aminoglycosides                  | N  | Antibacterial                                                                                                                                                                                        | 1973 |
| Atropine                                                            | Atropine                          | Tropane alkaloids                | N  | Anticholinergic - For the treatment of<br>poisoning by susceptible<br>organophosphorous nerve agents having<br>cholinesterase activity as well as<br>organophosphorous or carbamate<br>insecticides. | 1973 |
| Fosfestrol                                                          | Estrogen                          | Anabolic-androgenic<br>steroids  | ND | Anticancer                                                                                                                                                                                           | 1972 |
| Carbenicillin                                                       | Penicillin                        | Penicillins                      | ND | Antibacterial                                                                                                                                                                                        | 1972 |
| Carindacillin; Carbenicillin<br>indanyl                             | Penicillin                        | Penicillins                      | ND | Antibacterial                                                                                                                                                                                        | 1972 |
| Pristinamycin; Pristinamycine                                       | Pristinamycin                     | Streptogramins                   | N  | Antibacterial                                                                                                                                                                                        | 1972 |
| Heparin sodium                                                      | Heparin                           | Glycosaminoglycans               | N  | Anticoagulant                                                                                                                                                                                        | 1972 |
| Floxuridine                                                         | Arabinosyl<br>nucleosides         | Uracil analogues                 | S* | Oncological disease                                                                                                                                                                                  | 1971 |
| Megesterol acetate                                                  | Progesterone                      | Progestogens                     | ND | Anticancer                                                                                                                                                                                           | 1971 |
| Naloxone; Naltrexate                                                | Thebaine                          | Opiate alkaloids                 | ND | Neurological disease                                                                                                                                                                                 | 1971 |
| Megestrol acetate                                                   | Megestrol                         | Progestogens                     | ND | Oncological disease                                                                                                                                                                                  | 1971 |
| Dicloxacillin; Dicoxacillin                                         | Penicillin                        | Penicillins                      | ND | Antibacterial                                                                                                                                                                                        | 1971 |
| Cefazolin; Cefazoline;<br>Cephazolin                                | Cephalosporin                     | Glycopeptides;<br>Cephalosporins | ND | Antibacterial                                                                                                                                                                                        | 1971 |
| Capreomycin                                                         | Capreomycin                       | Tuberactinomycin family          | N  | Antibacterial                                                                                                                                                                                        | 1971 |
| Amphetamine                                                         | Amphetamine                       | Phenethylamine class             | N  | Attention-deficit disorder                                                                                                                                                                           | 1971 |
| Amphetamine                                                         | Ephedrine                         | Phenethylamine class             | N  | Attention-deficit disorder                                                                                                                                                                           | 1971 |
| Testolactone                                                        | Progesterone                      | Progestogens                     | ND | Oncological disease                                                                                                                                                                                  | 1970 |
| Prednisolone                                                        | Cortisol                          | Glucocorticoids                  | ND | Oncological disease                                                                                                                                                                                  | 1970 |
| Penicillamine                                                       | Penicillin                        | Penicillins                      | ND | Antibiotic                                                                                                                                                                                           | 1970 |
| Colistimethate sodium                                               | Colistin                          | Polymyxins                       | ND | Pulmonary infections                                                                                                                                                                                 | 1970 |
| Norethindrone acetate                                               | Norethindrone                     | Progestogens                     | ND | Oncological disease                                                                                                                                                                                  | 1970 |
| Cefaloglycin; Cephaloglycin                                         | Cephalosporin                     | Glycopeptides;<br>Cephalosporins | ND | Antibacterial                                                                                                                                                                                        | 1970 |
| Flucloxacillin; Floxacillin                                         | Penicillin                        | Penicillins                      | ND | Antibacterial                                                                                                                                                                                        | 1970 |
| Mecillinam; Amdinocillin;<br>Pivmecillinam; Amdinocillin<br>pivoxil | Penicillin                        | Penicillins                      | ND | Antibacterial                                                                                                                                                                                        | 1970 |

|                                                             |                                                     |                                           |    |                                                                        |      |
|-------------------------------------------------------------|-----------------------------------------------------|-------------------------------------------|----|------------------------------------------------------------------------|------|
| Clindamycin                                                 | Lincomycin                                          | Lincosamides                              | ND | Antibacterial                                                          | 1970 |
| Streptozocin; Streptozotocin; Stz                           | Streptozocin                                        | Glucosamine                               | N  | Oncological disease                                                    | 1970 |
| Levodopa                                                    | L-Dopa                                              | Catecholamines                            | N  | Dietary supplement                                                     | 1970 |
| Plicamycin                                                  | Plicamycin                                          | Aureolic acid family                      | N  | Anticancer                                                             | 1970 |
| Cytosine arabinoside; Ara-c                                 | Spongothymidine                                     | Cytosine analog (with an arabinose sugar) | S* | Oncological disease                                                    | 1969 |
| Troleandomycin; Oleandocetine                               | Erythromycin                                        | Macrolides                                | ND | Antibacterial                                                          | 1969 |
| Cytarabine                                                  | Cytosine                                            | Cytosine analogues                        | S* | cancers of white blood cells                                           | 1969 |
| Viomycin sulfate                                            | Viomycin sulfate                                    | Tuberactinomycin family                   | N  | Antibacterial                                                          | 1968 |
| Physostigmine; Eserine                                      | Physostigmine                                       | Pyrrroloindole alkaloids                  | N  | Neurological disease                                                   | 1968 |
| Deferoxamine mesylate                                       | Deferoxamine                                        | Hydroxamate siderophores                  | N  | acute iron poisoning                                                   | 1968 |
| Doxycycline                                                 | Oxytetracycline                                     | Tetracyclines                             | ND | Antibacterial                                                          | 1967 |
| Propranolol                                                 | Isoprenaline                                        | Catecholamines                            | ND | Cardiovascular disease                                                 | 1967 |
| Epicillin                                                   | Penicillin                                          | Penicillins                               | ND | Antibacterial                                                          | 1967 |
| Pentazocine                                                 | Morphine                                            | Opiate alkaloids                          | N  | Neurological disease                                                   | 1967 |
| Daunorubicin; Daunomycin; Rubomycin c                       | Daunorubicin                                        | Anthracyclines                            | N  | Oncological disease                                                    | 1967 |
| Epinephrine bitartrate                                      | Adrenaline                                          | Catecholamines                            | N  | Immunological, inflammatory and related disease - Inflammatory disease | 1967 |
| Thioguanine                                                 | Purine                                              | Purine                                    | S* | Oncological disease                                                    | 1966 |
| Doxorubicin; Doxorubicin hydrochloride; Hydroxydaunorubicin | Doxorubicin                                         | Anthracyclines                            | N  | Oncological disease                                                    | 1966 |
| Bleomycin; Bleomycin a2; Bleomycin b2)                      | Bleomycin                                           | Peptide-polyketides                       | N  | Oncological disease                                                    | 1966 |
| Amphotericin                                                | Amphotericin                                        | Polyenes                                  | N  | Antibacterial                                                          | 1966 |
| Clomocycline                                                | Tetracycline                                        | Tetracyclines                             | ND | Antibacterial                                                          | 1965 |
| Prednisone                                                  | Cortisone                                           | Steroid derivatives (Corticosteroids)     | ND | Oncological disease                                                    | 1965 |
| Hydroxyprogesterone                                         | Progesterone                                        | Progestogens                              | ND | Oncological disease                                                    | 1965 |
| Fluoxymesterone                                             | Cortisol                                            | Glucocorticoids                           | ND | Oncological disease                                                    | 1965 |
| Ethinyl estradiol                                           | Cholesterol                                         | Sterols                                   | ND | Antineoplastic                                                         | 1965 |
| Ethinyl estradiol                                           | Estradiol                                           | Anabolic-androgenic steroids              | ND | Antineoplastic                                                         | 1965 |
| Vinblastine; Vlb; Vinca leukoblastine sulfate; Vbl          | Vinblastine                                         | Vinca alkaloids                           | N  | Oncological disease                                                    | 1965 |
| Oxytetracycline                                             | Oxytetracycline                                     | Tetracyclines                             | N  | Antibacterial                                                          | 1965 |
| Testosterone                                                | Testosterone                                        | Anabolic-androgenic steroids              | N  | Anticancer                                                             | 1965 |
| Cefroxadine                                                 | Cephalosporin                                       | Glycopeptides; Cephalosporins             | ND | Antibacterial                                                          | 1964 |
| Dromostanolone                                              | Anabolic androgenic steroid similar to testosterone | Anabolic-androgenic steroids              | ND | Oncological disease                                                    | 1964 |
| Cefalotin sodium; Cephalothin                               | Cephalosporin                                       | Glycopeptides; Cephalosporins             | ND | Antibacterial                                                          | 1964 |
| Cefacetrile; Cephacetrile                                   | Cephalosporin                                       | Glycopeptides; Cephalosporins             | ND | Antibacterial                                                          | 1964 |

|                                 |                            |                                                            |    |                                                    |      |
|---------------------------------|----------------------------|------------------------------------------------------------|----|----------------------------------------------------|------|
| Ceftazole; Ceftazol             | Cephalosporin              | Glycopeptides;<br>Cephalosporins                           | ND | Antibacterial                                      | 1964 |
| Cycloserine                     | Cycloserine                | Isoxazolidinones (cyclic derivative of serine)             | N  | Antibacterial                                      | 1964 |
| Nystatin                        | Nystatin                   | Polyenes                                                   | N  | Antifungal                                         | 1964 |
| Neomycin                        | Neomycin                   | Aminoglycosides                                            | N  | Antibacterial                                      | 1964 |
| Lincomycin                      | Lincomycin                 | Lincosamides                                               | N  | Antibacterial                                      | 1964 |
| Dactinomycin; Actinomycin d     | Actinomycin d              | Actinomycine peptide lactones                              | N  | Oncological disease                                | 1964 |
| Polymyxin b sulfate             | Polymyxin b sulfate        | Polymyxins                                                 | N  | Antibacterial                                      | 1964 |
| Erythromycin                    | Erythromycin               | Macrolides                                                 | N  | Antibacterial                                      | 1964 |
| Aminocaproic acid               | Lysine                     | Amino acids with acyclic hydroxyl side chain & derivatives | ND | bleeding disorders                                 | 1964 |
| Trioxsalen                      | Trioxsalen                 | Furanocoumarins                                            | N  | phototherapy treatment of vitiligo and hand eczema | 1964 |
| Lymecycline                     | Tetracycline               | Tetracyclines                                              | ND | Antibacterial                                      | 1963 |
| Tetracycline                    | Tetracycline               | Tetracyclines                                              | N  | Antibacterial                                      | 1963 |
| Vincristine; Vcr; Leurocristine | Vincristine                | Vinca alkaloids                                            | N  | Oncological disease                                | 1963 |
| Fusafungine                     | Fusafungine                | Hexa-peptide with unusual amino acid                       | N  | Antibiotic                                         | 1963 |
| Fluocinolone acetonide          | Cortisol                   | Glucocorticoids                                            | ND | reduce skin inflammation and relieve itching       | 1963 |
| Idoxuridine                     | Deoxyuridine               | Uridine analogues                                          | ND | anti-herpesvirus antiviral drug                    | 1963 |
| Fluorouracil                    | Arabinosyl nucleosides     | Pyrimidine analogues                                       | S* | Oncological disease                                | 1962 |
| Griseofulvin; Grisovin          | Griseofulvin               | Benzofuran cycloalkene                                     | N  | Antifungal                                         | 1962 |
| Fusidic acid                    | Fusidic acid               | Steroid derivatives (fusidane steroids)                    | N  | Antibacterial                                      | 1962 |
| Stanozolol                      | Dihydrotestosterone        | Androgens                                                  | ND | anaemia and hereditary angioedema                  | 1962 |
| Ampicillin; Pivampicillin       | Penicillin                 | Penicillins                                                | ND | Antibacterial                                      | 1961 |
| Tranlycypromine sulfate         | Amphetamine                | Phenethylamine class                                       | ND | Major depressive episode without melancholia       | 1961 |
| Spectinomycin                   | Spectinomycin              | Aminocyclitols                                             | N  | Antibiotic                                         | 1961 |
| Mithramycin                     | Mithramycin                | Aureolic acid family                                       | N  | Anticancer                                         | 1961 |
| Deserpidine                     | Deserpidine                | Rauwolfia alkaloids                                        | N  | Cardiovascular disease                             | 1961 |
| Colchicine                      | Colchicine                 | Colchicine alkaloids                                       | N  | Oncological disease                                | 1961 |
| Chromomycin a3                  | Chromomycin a3             | Antraquinones                                              | N  | Oncological disease                                | 1961 |
| Meticillin; Methicillin         | Penicillin                 | Penicillins                                                | ND | Antibacterial                                      | 1960 |
| Ergotamine                      | Ergotamine                 | Ergopeptides                                               | N  | Neurological disease                               | 1960 |
| Demeclocycline                  | Demeclocycline             | Tetracyclines                                              | N  | Antibacterial                                      | 1960 |
| Oxymorphone                     | Thebaine                   | Opiate alkaloids                                           | ND | Neurological disease                               | 1959 |
| Oxymorphone                     | Codeine                    | Opiate alkaloids                                           | ND | Neurological disease                               | 1959 |
| Virginiamycin                   | Pristinamycin IIA          | Romidepsin analogues                                       | ND | Antibiotic                                         | 1959 |
| Nadrolone phenylpropionate      | Nadrolone phenylpropionate | Anabolic-androgenic steroids                               | ND | Anticancer                                         | 1959 |
| Nandrolone phenpropionate       | Nandrolone                 | Anabolic-androgenic steroids                               | ND | Oncological disease                                | 1959 |
| Triamcinolone                   | Cortisol                   | Glucocorticoids                                            | ND | Oncological disease                                | 1958 |

|                                       |                        |                           |    |                                                                       |      |
|---------------------------------------|------------------------|---------------------------|----|-----------------------------------------------------------------------|------|
| Medroxyprogesterone acetate           | 17-hydroxyprogesterone | Glucocorticoids           | ND | Oncological disease                                                   | 1958 |
| Dexamethasone                         | Cortisol               | Glucocorticoids           | ND | Oncological disease                                                   | 1958 |
| Colistin                              | Colistin               | Polymyxins                | N  | Antibiotic                                                            | 1958 |
| Mitomycin c; Mitomycin                | Mitomycin              | Mitomycins                | N  | Oncological disease                                                   | 1956 |
| Thiamphenicol                         | Chloramphenicol        | Chloramphenicol alkaloids | ND | Antibiotic                                                            | 1955 |
| Methylprednisolone                    | Prednisolone           | Glucocorticoids           | ND | Oncological disease                                                   | 1955 |
| Reserpine                             | Reserpine              | Rauwolfia alkaloids       | N  | Cardiovascular disease                                                | 1955 |
| Novobiocin                            | Novobiocin             | Aminocoumarins            | N  | Antibacterial                                                         | 1955 |
| Spiramycin                            | Spiramycin             | Macrolides                | N  | Antibiotic                                                            | 1955 |
| Pinitol                               | Pinitol                | Cyclitols                 | N  | Expectorant                                                           | 1955 |
| Sarkomycin                            | Sarkomycin             | Sarkomycins               | N  | Anticancer                                                            | 1954 |
| Warfarin                              | Dicoumarol             | 4-Hydroxycoumarins        | N  | Cardiovascular disease                                                | 1954 |
| Methylmorphine                        | Methylmorphine         | Opiate alkaloids          | N  | Neurological disease                                                  | 1954 |
| Carzinophilin                         | Carzinophilin          | Azinomycins               | N  | Oncological disease                                                   | 1954 |
| Methoxsalen                           | Methoxsalen            | Furanocoumarins           | N  | psoriasis, eczema, vitiligo, and some cutaneous lymphomas             | 1954 |
| Mercaptopurine                        | Purine                 | Purine                    | S* | Oncological disease                                                   | 1953 |
| Vitamin b3                            | Vitamin b3             | Nicotinic acids           | N  | Lipid disorders, cardiovascular disease                               | 1953 |
| Methotrexate sodium                   | Folic acid             | Folate analogues          | S* | antimetabolite, antifolate                                            | 1953 |
| Vitamin a                             | Vitamin a              | Ionone polyisoprene       | N  | Night blindness                                                       | 1953 |
| Vitamin c                             | Vitamin c              | Sugar acids               | N  | Vitamin C deficiency                                                  | 1953 |
| Vitamin b1                            | Vitamin b1             | Aminopyrimidine thiazoles | N  | Vitamin B1 Deficiency                                                 | 1953 |
| Vitamin b6                            | Vitamin b6             |                           | N  | Vitamin B6 deficiency                                                 | 1953 |
| Leucovorin calcium                    | Leucovorin calcium     | Folinic acid analogues    | N  | cancer chemotherapy                                                   | 1952 |
| Quinidine                             | Quinidine              | 5-aminoquinolines         | N  | Antiarrhythmic                                                        | 1950 |
| Chlortetracycline; Chlorotetracycline | Chlortetracycline      | Tetracyclines             | N  | Antibacterial                                                         | 1950 |
| Norepinephrine bitartrate             | Tyrosine               | Aromatic amino acids      | ND | attention-deficit/hyperactivity disorder, depression, and hypotension | 1950 |
| Cortisone acetate                     | Cortisone acetate      | Corticosteroids           | N  | Antiinflammatory                                                      | 1950 |
| Bacitracin                            | Bacitracin             | Cyclic polypeptides       | N  | Antibacterial                                                         | 1948 |
| Caffeine; Ergotamine tartrate         | Caffeine               | Xanthine analogues        | N  | vascular headaches                                                    | 1948 |
| Caffeine; Ergotamine tartrate         | Ergotamine tartrate    | Ergopeptides              | N  | vascular headaches                                                    | 1948 |
| Phenoxymethylpenicillin; Penicillin v | Penicillin             | Penicillins               | ND | Antibacterial                                                         | 1947 |
| Streptomycin sulfate                  | Streptomycin sulfate   | Aminoglycosides           | N  | Antibacterial                                                         | 1946 |
| Folic acid                            | Folic acid             | Folate analogues          | N  | Folate deficiency                                                     | 1946 |
| Methamphetamine                       | Amphetamine            | Phenethylamine class      | ND | Attention Deficit Disorder with Hyperactivity                         | 1943 |
| Methamphetamine                       | Ephedrine              | Phenethylamine class      | ND | Attention Deficit Disorder with Hyperactivity                         | 1943 |
| Gramicidin s                          | Gramicidin             | Linear pentadecapeptides  | ND | Antibiotic                                                            | 1942 |
| Curare; Delacurarine; Jexin; Tubarine | Tubocurarine           | Bisbenzylisoquinolines    | ND | Skeletal muscle relaxant                                              | 1942 |

|                                    |                       |                                 |    |                                                                                    |      |
|------------------------------------|-----------------------|---------------------------------|----|------------------------------------------------------------------------------------|------|
| Benzylpenicillin; Penicillin g     | Penicillin            | Penicillins                     | N  | Antibacterial                                                                      | 1942 |
| Estrogens, conjugated              | Estrogens, conjugated | Oestrogens                      | N  | hot flashes, and burning, itching, and dryness of the vagina and surrounding areas | 1942 |
| Chloroquine                        | Quinine               | 5-aminoquinolines               | ND | Antiparasitic                                                                      | 1940 |
| Quinine                            | Quinine               | 5-aminoquinolines               | N  | Antiparasitic                                                                      | 1940 |
| Pilocarpine                        | Pilocarpine           | Diazole dihydrofuran            | N  | Glaucoma. For the treatment of radiation-induced dry mouth                         | 1900 |
| Aspirin; Acetylsalicylic acid; Asa | Salicylic acid        | Monohydroxybenzoic acids        | ND | Immunological, inflammatory and related disease - Inflammatory disease             | 1898 |
| Heroin; Diacetylmorphine           | Morphine              | Opiate alkaloids                | N  | Neurological disease                                                               | 1898 |
| Noscapine (narcotine)              | Noscapine (narcotine) | Phthalideisoquinoline alkaloids | N  | Antitussive                                                                        | 1895 |
| Cocaine; Benzoylmethyl ecgonine    | Cocaine               | Tropane alkaloids               | N  | Neurological disease                                                               | 1884 |
| Cotinine                           | Cotinine              | Tobacco alkaloids               | N  | Insecticide                                                                        | 1560 |

**Supplementary Table S3** List of the nature-related small molecule drugs in clinical trials and their natural product leads. Nature-related small molecule drugs include natural products and natural product semi-synthetic derivatives, mimetics, and pharmacophore-guided synthetic molecules.

| Drug Name                                    | Drug Lead                               | Lead Scaffold                 | Drug Type | Targeted Disease                     | Clinical Phase |
|----------------------------------------------|-----------------------------------------|-------------------------------|-----------|--------------------------------------|----------------|
| 1,5-DCQA (1,5-di-O-caffeoylquinic acid)      | 1,5-DCQA (1,5-di-O-caffeoylquinic acid) | Phenylpropanoids              | N         | Antiviral                            | Clinical Trial |
| 10-Hydroxycamptothecin                       | Camptothecin                            | Camptothecin analogues        | ND        | Oncological disease                  | Phase II       |
| 1-deoxynojirimycin (AT2200, moranoline)      | Nojirimycin                             | Imino sugars                  | ND        | Cardiovascular and metabolic disease | Phase I        |
| 4-Methylumbelliferone                        | Umbelliferone                           | Coumarins                     | ND        | Antiviral                            | Phase II       |
| 9-AC (IDEC-132)                              | Camptothecin                            | Camptothecin analogues        | ND        | Oncological disease                  | Phase II       |
| A 366833                                     | Epibatidine                             | Epibatidine alkaloids         | ND        | Analgesic                            | Phase I        |
| ABJ879                                       | Patupilone (epothilone B)               | Polyketide macrolactones      | ND        | Oncological disease                  | Phase I        |
| ABT-594                                      | Epibatidine                             | Epibatidine alkaloids         | ND        | Neurological disease                 | Phase II       |
| ABT-869                                      | Zeatin (Cytokinins)                     | Purine analogues adenine-type | ND        | Anticancer                           | Phase I        |
| AE-941                                       | Squalamine                              | Aminosterols                  | ND        | Oncological disease                  | Phase III      |
| AEE-788                                      | Zeatin (Cytokinins)                     | Purine analogues adenine-type | ND        | Oncological disease                  | Phase II       |
| AG3340                                       | AG3340                                  | Hydroxamic acid derivatives   | S*/NM     | Cancer                               | Phase III      |
| AG7088                                       | AG7088                                  | Peptide aldehydes             | S*/NM     | Common cold                          | Phase II       |
| Allyl isothiocyanate                         | Allyl isothiocyanate                    | Isothiocyanates               | N         |                                      | Clinical Trial |
| Alvespimycin (17-DMAG, KOS-1022, NSC-707545) | Geldanamycin                            | Ansamycins                    | ND        | Oncological disease                  | Phase II       |
| AMG706                                       | Zeatin (Cytokinins)                     | Purine analogues adenine-type | ND        | Anticancer                           | Phase II       |
| Aminocandin (NXL-201, IP960, HMR-3270)       | Deoxymulundocandin                      | Echinocandin type peptides    | ND        | Antifungal                           | Phase I        |
| Arenastatin A (cryptophycin-24)              | Arenastatin A (cryptophycin-24)         | Cyclic depsipeptides          | N         | Oncological disease                  | Phase I        |
| Artemisone (BAY 44-9585)                     | Artemisinin                             | Trioxanes                     | ND        | Antiparasitic                        | Phase II       |
| Arterolane (RBx11160, trioxolane, OZ-277)    | Artemisinin                             | Trioxanes                     | ND        | Antiparasitic                        | Phase II       |
| AVE-8062 (AC-7700, AVE8062A)                 | Combretastatin A-4                      | Dihydrostilbenoids            | ND        | Oncological disease                  | Phase III      |
| AVE-8063                                     | Combretastatin A-4                      | Dihydrostilbenoids            | ND        | Oncological disease                  | Phase I        |
| AVE-8064                                     | Combretastatin A-4                      | Dihydrostilbenoids            | ND        | Oncological disease                  | Phase I        |
| AVE9633 (anti CD33-DM4)                      | Ansamitocin P-3                         | Ansamycins                    | ND        | Oncological disease                  | Phase I        |
| Axitinib (AG013736)                          | Zeatin (Cytokinins)                     | Purine analogues adenine-type | ND        | Anticancer                           | Phase II       |
| Azamulin                                     | Pleuromutilin                           | Pleuromutilin scaffold        | ND        | Antibiotic                           | Phase I        |
| AZD-0530 (AZM-475271)                        | Zeatin (Cytokinins)                     | Purine analogues adenine-type | ND        | Anticancer                           | Phase I        |
| BAL-19403                                    | Erythromycin                            | Macrolides                    | ND        | Antibacterial                        | Clinical Trial |
| BAY-57-9352                                  | Zeatin (Cytokinins)                     | Purine analogues adenine-type | ND        | Anticancer                           | Phase I        |
| BC-3205                                      | Pleuromutilin                           | Pleuromutilin scaffold        | ND        | Antibacterial                        | Phase I        |

|                                                                                                  |                                  |                                      |       |                       |                |
|--------------------------------------------------------------------------------------------------|----------------------------------|--------------------------------------|-------|-----------------------|----------------|
| BC-3205                                                                                          | Pleuromutilin                    | Pleuromutilin scaffold               | ND    | Antibacterial         | Phase II       |
| BC-3781.                                                                                         | Pleuromutilin                    | Pleuromutilin scaffold               | ND    | Antibiotic            | Phase II       |
| BC-7013                                                                                          | Pleuromutilin                    | Pleuromutilin scaffold               | ND    | Antibacterial         | Phase I        |
| Becatecarin (XL-119, NSC 655649, BMY-27557)                                                      | Rebeccamycin (staurosporine)     | Staurosporine alkaloids              | ND    | Oncological disease   | Phase II       |
| Bengamide A                                                                                      | Bengamide                        | Bengamides                           | ND    | Oncological disease   | Phase I        |
| Berubicin (RTA744, WP744)                                                                        | Doxorubicin                      | Anthracyclines                       | ND    | Oncological disease   | Phase II       |
| Beta-lapachone (ARQ-501, ARQ 501)                                                                | Beta-lapachone (lapachol)        | Quinones                             | ND    | Oncological disease   | Phase II       |
| Betulinic acid (ALS-357)                                                                         | Betulinic acid (ALS-357)         | Steroid derivatives (steroid acids)  | N     | Oncological disease   | Phase I        |
| Bevirimat (PA-457, DSB, 3',3'-Dimethylsuccinyl-betulinic acid, dimethyl succinyl betulinic acid) | Triterpenoid betulinic acid      | Steroid derivatives (steroid acids)  | ND    | Antiviral             | Phase II       |
| Bizelesin                                                                                        | CC-1065                          | Duocarmycins                         | ND    | Oncological disease   | Phase I        |
| BMS-188797                                                                                       | Paclitaxel                       | Taxanes                              | ND    | Oncological disease   | Phase II       |
| BMS-247550                                                                                       | Epothilone B                     | Polyketide macrolactones             | ND    | Anticancer            | Phase III      |
| BMS-250749                                                                                       | Camptothecin                     | Camptothecin analogues               | ND    | Oncological disease   | Phase I        |
| BMS-275291                                                                                       | BMS-275291                       | Hydroxamic acids & derivatives       | S*/NM | Cancer                | Phase III      |
| BMS-310705 (21-aminoepothilone B)                                                                | Patupilone (epothilone B)        | Polyketide macrolactones             | ND    | Oncological disease   | Phase I        |
| BMS-582664                                                                                       | Zeatin (Cytokinins)              | Purine analogues adenine-type        | ND    | Anticancer            | Phase I        |
| BMS-599626                                                                                       | Zeatin (Cytokinins)              | Purine analogues adenine-type        | ND    | Anticancer            | Phase I        |
| BNP-1350                                                                                         | Camptothecin                     | Camptothecin analogues               | ND    | Oncological disease   | Phase III      |
| Bosutinib (SKI-606)                                                                              | Zeatin (Cytokinins)              | Purine analogues adenine-type        | ND    | Anticancer            | Phase I        |
| Bruceantin (NSC-165, 563)                                                                        | Bruceantin (NSC-165, 563)        | Quassinoid diterpenes                | N     | Oncological disease   | Phase II       |
| Bryostatin 1                                                                                     | Bryostatin 1                     | Tetracyclic heptadecane skeletons    | ND    | Oncological disease   | Phase II       |
| Bryostatin 1/AraC                                                                                | Bryostatin 1/AraC                | Tetracyclic heptadecane skeletons    | N     | Oncological disease   | Phase I        |
| Bryostatin 1/Fara                                                                                | Bryostatin 1/Fara                | Tetracyclic heptadecane skeletons    | N     | Oncological disease   | Phase I        |
| Bryostatin 1/paclitaxel                                                                          | Bryostatin 1/paclitaxel          | Tetracyclic heptadecane skeletons    | N     | Oncological disease   | Phase II       |
| Bryostatin 1/vincristine                                                                         | Bryostatin 1/vincristine         | Tetracyclic heptadecane skeletons    | N     | Oncological disease   | Phase I        |
| Cabazitaxel (XRP-6258, TXD-258, RPR-116258A)                                                     | Paclitaxel                       | Taxanes                              | ND    | Oncological disease   | Phase III      |
| Canertinib (CI-1033, PD183805)                                                                   | Zeatin (Cytokinins)              | Purine analogues adenine-type        | ND    | Anticancer            | Phase II       |
| Cannabidiol                                                                                      | Cannabidiol                      | Cannabinoids                         | N     | Anxiety and psychosis | Phase II       |
| Capsaicin (ALGRX 4975)                                                                           | Capsaicin (ALGRX 4975)           | Capsaicinoids                        | N     | Neurological disease  | Phase III      |
| Carfilzomib (CFZ)                                                                                | Epoxomicin (peptide epoxiketone) | Epoxyketone containing oligopeptides | S/NM  | Multiple myeloma      | Phase III      |
| Castor oil                                                                                       | Castor oil                       | Fatty acids                          | N     | Constipation          | Clinical Trial |
| Cediranib (AZD-2171)                                                                             | Zeatin (Cytokinins)              | Purine analogues adenine-type        | ND    | Anticancer            | Phase II       |
| Ceftaroline acetate (PPI-0903, TAK-599)                                                          | Cephalosporin nucleus,           | Glycopeptides; Cephalosporins        | ND    | Antibacterial         | Phase II       |

|                                                                                         |                                                                                          |                                      |       |                                                 |                |
|-----------------------------------------------------------------------------------------|------------------------------------------------------------------------------------------|--------------------------------------|-------|-------------------------------------------------|----------------|
|                                                                                         | 7-aminocephalosporanic acid (7-ACA), derived from cephalosporin C                        |                                      |       |                                                 |                |
| Ceftizoxime alapivoxil (AS-924)                                                         | Cephalosporin nucleus, 7-aminocephalosporanic acid (7-ACA), derived from cephalosporin C | Glycopeptides; Cephalosporins        | ND    | Antibacterial                                   | Clinical Trial |
| Ceftobiprole (ceftobriopole medocaril, BAL-5788, Ro-65-5788)                            | Cephalosporin nucleus, 7-aminocephalosporanic acid (7-ACA), derived from cephalosporin C | Glycopeptides; Cephalosporins        | ND    | Antibacterial                                   | Phase III      |
| Cematodin                                                                               | Dolastatin 15                                                                            | Depsipeptides                        | ND    | Oncological disease                             | Phase II       |
| CEP-1347 (KT-8138, KT7515)                                                              | K-252a (Staurosporine)                                                                   | Staurosporine alkaloids              | ND    | Neurological disease                            | Phase III      |
| CEP-7055                                                                                | Staurosporine                                                                            | Staurosporine alkaloids              | ND    | Oncological disease                             | Phase I        |
| Cethromycin (ABT-773)                                                                   | Erythromycin                                                                             | Macrolides                           | ND    | Antibacterial                                   | Phase III      |
| CGS-27023A                                                                              | CGS-27023A                                                                               | Hydroxamic acid derivatives          | S*/NM | Cancer                                          | Phase II       |
| Civamide (cis-capsaicin, zucapsaicin, WL-1001)                                          | Civamide (cis-capsaicin, zucapsaicin, WL-1001)                                           | Capsaicinoids                        | ND    | Neurological disease                            | Phase III      |
| CMB 401 (hCTMO1-calicheamicin, CDP671)                                                  | Calicheamicin                                                                            | Calicheamicins                       | ND    | Oncological disease                             | Phase II       |
| COL-3                                                                                   | Tetracycline                                                                             | Tetracyclines                        | S*/NM | Cancer                                          | Phase II       |
| Combretastatin A-4 phosphate (CA4P, CA4PO4, combretastin A4 phosphate, combretastin A4) | Combretastatin A-4                                                                       | Dihydrostilbenoids                   | ND    | Oncological disease                             | Phase III      |
| Conantokin-G (CGX-1007, conantokin G)                                                   | Conantokin-G (CGX-1007, conantokin G)                                                    | Conantokins                          | N     | Neurological disease                            | Phase II       |
| Contulakin-G (CGX-1160, contulakin G)                                                   | Contulakin-G (CGX-1160, contulakin G)                                                    | Large O-glycosylated linear peptides | N     | Neurological disease                            | Phase II       |
| CP 7075 (IP 751, ajulemic acid, CT-3)                                                   | CP 7075 (IP 751, ajulemic acid, CT-3)                                                    | Cannabinoids                         | ND    | Neurological disease                            | Phase II       |
| CP-724714                                                                               | Zeatin (Cytokinins)                                                                      | Purine analogues adenine-type        | ND    | Anticancer                                      | Phase I        |
| CP-751 (CP-751,871)                                                                     | Staurosporine                                                                            | Staurosporine alkaloids              | ND    | Oncological disease                             | Phase III      |
| Cryptophycin-52 (LY355703)                                                              | Taxol                                                                                    | Taxanes                              | ND    | Anticancer                                      | Phase II       |
| Curcumin                                                                                | Curcumin                                                                                 | Diarylheptanoids                     | ND    | Oncological disease                             | Phase II       |
| DA-5018                                                                                 | DA-5018                                                                                  | Vanilloids                           | ND    | Neurological disease                            | Phase II       |
| DA-6034                                                                                 | Eupatilin                                                                                | O-methylated flavones                | ND    | Immunological, inflammatory and related disease | Phase II       |
| Daidzein (4',7-dihydroxyisoflavone)                                                     | Daidzein (4',7-dihydroxyisoflavone)                                                      | Isoflavones                          | N     | Oncological disease                             | Phase I        |
| Dapagliflozin (BMS-512148)                                                              | Phlorizin                                                                                | Dihydrochalcones                     | ND    | Neurological disease                            | Phase III      |
| Datelliptium acetate (NSC 311152)                                                       | Ellipticine                                                                              | Ellipticine alkaloids                | ND    | Oncological disease                             | Phase II       |



|                                                          |                                          |                                                 |       |                      |           |
|----------------------------------------------------------|------------------------------------------|-------------------------------------------------|-------|----------------------|-----------|
| Debio 9902 (ZT-1)                                        | Huperzine                                | Sesquiterpene alkaloids                         | ND    | Neurological disease | Phase II  |
| Debio-025 (UNIL025, MeAla3EtVal4-cyclosporin)            | Ciclosporin                              | Nonribosomal peptide cyclic structure           | ND    | Antiviral            | Phase II  |
| Deforolimus (MK-8669, AP-23573)                          | Sirolimus (rapamycin)                    | Macrolides                                      | ND    | Oncological disease  | Phase III |
| Dehydalone (KOS-1584, 9,10-didehydroepothilone D)        | Epothilone D                             | Polyketide macrolactones                        | ND    | Oncological disease  | Phase I   |
| Dehydrodidemnin B (plitidepsin, aplidin)                 | Dehydrodidemnin B (plitidepsin, aplidin) | Cyclic depsipeptides                            | N     | Oncological disease  | Phase II  |
| Depsipeptide (NSC 630176)                                | Romidepsin                               | Depsipeptide cyclic structure                   | N     | Oncological disease  | Phase II  |
| DHA-paclitaxel                                           | Paclitaxel                               | Taxanes                                         | ND    | Oncological disease  | Phase III |
| Diflomotecan (BN-80915)                                  | Camptothecin                             | Camptothecin analogues                          | ND    | Oncological disease  | Phase II  |
| DMBX (GTS-21, DMXB-anabaseine, DMXB-A)                   | Anabaseine (worm toxin)                  | Nicotine alkaloids                              | ND    | Neurological disease | Phase II  |
| DRF-1042                                                 | Camptothecin                             | Camptothecin analogues                          | ND    | Oncological disease  | Phase II  |
| E7974                                                    | Hemiasterlin                             | Tryptophan derivatives                          | ND    | Oncological disease  | Phase I   |
| E7974                                                    | Hemiasterlin peptide                     | Tryptophan derivatives                          | ND    | Oncological disease  | Phase I   |
| EC145                                                    | Vinblastine                              | Vinca alkaloids                                 | ND    | Oncological disease  | Phase I   |
| ECO-4601 (diazepinomicin)                                | ECO-4601 (diazepinomicin)                | Dibenzodiazepine alkaloids                      | ND    | Oncological disease  | Phase II  |
| Edotecarin (J-107088)                                    | Rebeccamycin (staurosporine)             | Staurosporine alkaloids                         | ND    | Oncological disease  | Phase III |
| Elomotecan (BN-80927, LBQ707, R-1559)                    | Camptothecin                             | Camptothecin analogues                          | ND    | Oncological disease  | Phase I   |
| Elsamitrucin (elsamicin A)                               | Elsamicin A (chartreusin)                | Coumarin-related chartarin disaccharide complex | ND    | Oncological disease  | Phase II  |
| EndoTAG-1                                                | Paclitaxel                               | Taxanes                                         | ND    | Oncological disease  | Phase II  |
| Enzastaurin (LY317615)                                   | Staurosporine                            | Staurosporine alkaloids                         | ND    | Oncological disease  | Phase III |
| EP-420 (EP-013420)                                       | Erythromycin                             | Macrolides                                      | ND    | Antibacterial        | Phase II  |
| Epigallocatechin gallate                                 | Epigallocatechin gallate                 | Catechins                                       | N     | Oncological disease  | Phase II  |
| Epothilone D (KOS-862, Kosan-862, deoxyepothilone B)     | Patupilone (epothilone B)                | Polyketide macrolactones                        | ND    | Oncological disease  | Phase II  |
| Everolimus (RAD-001)                                     | Sirolimus (rapamycin)                    | Macrolides                                      | ND    | Oncological disease  | Phase III |
| Exatecan (DX-8951f, exetecan, exatecan mesilate, DE-310) | Camptothecin                             | Camptothecin analogues                          | ND    | Oncological disease  | Phase III |
| Faropenem daloxate (SUN-208, BAY-56-6824)                | Thienamycin                              | Carbapenam                                      | ND    | Antibacterial        | Phase III |
| Flavopiridol (alvocidib, HMR 1275)                       | Rohitukine                               | Chromane alkaloids                              | ND    | Oncological disease  | Phase III |
| Fostriecin                                               | Fostriecin                               | Phosphate esters with a long tail               | N     | Oncological disease  | Phase I   |
| Friulimicin B                                            | Friulimicin B                            | Lipo(depsi)peptides                             | N     | Antibacterial        | Phase I   |
| Genistein                                                | Genistein (isoflavone)                   | Isoflavones                                     | ND    | Oncological disease  | Phase II  |
| Gimatecan (ST-1481)                                      | Camptothecin                             | Camptothecin analogues                          | ND    | Oncological disease  | Phase II  |
| GL-331                                                   | Podophyllotoxin                          | Podophyllotoxin lignans                         | ND    | Oncological disease  | Phase II  |
| GSK-189075/KGT-1681                                      | Phlorizin                                | Dihydrochalcones                                | ND    | Neurological disease | Phase II  |
| GW640385                                                 | GW640385                                 | Tyrosyl-based arylsulfonamides                  | S/NM  | Antiviral            | Phase II  |
| GW823093C (823093,                                       | GW823093C                                | Fluorinated phenyl alanyl                       | S*/NM | Diabetes mellitus    | Phase II  |

|                                                                                 |                                       |                                                          |       |                                                 |           |
|---------------------------------------------------------------------------------|---------------------------------------|----------------------------------------------------------|-------|-------------------------------------------------|-----------|
| GW823093)                                                                       | (823093,<br>GW823093)                 | derivatives                                              |       |                                                 |           |
| HKI-272                                                                         | Zeatin (Cytokinins)                   | Purine analogues adenine-type                            | ND    | Anticancer                                      | Phase II  |
| Homocamptothecin                                                                | Camptothecin                          | Camptothecin analogues                                   | ND    | Oncological disease                             | Phase I   |
| Homoharringtonine (omacetaxine mepesuccinate, harringtonine, homoharringtonine) | Homoharringtonine (homoharrington)    | Cephalotaxine alkaloids                                  | ND    | Oncological disease                             | Phase III |
| HTI-286 (SPA-110)                                                               | Hemiasterlin                          | Tryptophan derivatives                                   | ND    | Oncological disease                             | Phase II  |
| IdB 1016 (silibin, silybin and phosphatidylcholine complex)                     | Silybin                               | Flavanones                                               | ND    | Oncological disease                             | Phase II  |
| IDN-6556                                                                        | IDN-6556                              | Oxamyl dipeptides & analogues                            | S*/NM | Hepatitis C                                     | Phase II  |
| Ilepatril (AVE7688)                                                             | Teprotide                             | Nonapeptides                                             | ND    | Cardiovascular and metabolic disease            | Phase III |
| IM862                                                                           | IM862                                 | Tryptophan derivatives                                   | N     | Anticancer                                      | Phase III |
| IMGN-242; HuC242-DM4; cantuzumab mertansine                                     | Ansamitocin P-3                       | Ansamycins                                               | ND    | Oncological disease                             | Phase II  |
| IMGN-901 (HuN901-DM1) (a conjugate of maytansinoid DM1 and huN901)              | Ansamitocin P-3                       | Ansamycins                                               | ND    | Oncological disease                             | Phase II  |
| Indirubin                                                                       | Indirubin                             | Bisindole alkaloids                                      | N     | Oncological disease                             | Phase II  |
| Indole-3-carbinol (I3C, I-3-C)                                                  | Indole-3-carbinol (I3C, I-3-C)        | Indole derivatives                                       | N     | Oncological disease                             | Phase I   |
| Ingenol 3-angelate (PEP005, Ingenol 3-O-angelate)                               | Ingenol                               | Diterpenes                                               | ND    | Oncological disease                             | Phase II  |
| Inotuzumab ozogamicin; CMC-544                                                  | Calicheamicin                         | Calicheamicins                                           | ND    | Oncological disease                             | Phase III |
| IPL512602                                                                       | Contignasterol                        | Oxygenated steroids with unnatural 14.beta configuration | ND    | Asthma                                          | Phase II  |
| IPL-576,092 (HMR-4011A, IPL576,092)                                             | Contignasterol                        | Oxygenated steroids with unnatural 14.beta configuration | ND    | Inflammatory disease                            | Phase II  |
| Irofulven (MGI-114, HMAF, 6-hydroxymethylacylfulvene)                           | Illudin S                             | Illudins sesquiterpenes                                  | ND    | Oncological disease                             | Phase III |
| ISA247                                                                          | Cyclosporine                          | Nonribosomal peptide cyclic structure                    | ND    | Immunological, inflammatory and related disease | Phase II  |
| Isofagomine (AT2101)                                                            | 1-deoxynojirimycin                    | Imino sugars                                             | ND    | Cardiovascular and metabolic disease            | Phase II  |
| JC-9 (ASC-9)                                                                    | Curcumin                              | Diarylheptanoids                                         | ND    | Anticancer                                      | Phase II  |
| Kahalalide F                                                                    | Kahalalide F                          | Depsipeptides                                            | ND    | Oncological disease                             | Phase II  |
| KRN-5500                                                                        | Spicamycin                            | Purine nucleoside analogues                              | ND    | Neurological disease                            | Phase II  |
| KRN633                                                                          | Zeatin (Cytokinins)                   | Purine analogues adenine-type                            | ND    | Anticancer                                      | Phase I   |
| KRX-0601 (UCN-01, KW-2401, 7-hydroxystaurosporine)                              | Staurosporine                         | Staurosporine alkaloids                                  | ND    | Oncological disease                             | Phase II  |
| KW-2189                                                                         | Duocarmycin B2                        | Duocarmycins                                             | ND    | Oncological disease                             | Phase II  |
| LAF-389 (NVP-LAF-389)                                                           | Bengamide B                           | Bengamides                                               | ND    | Oncological disease                             | Phase I   |
| L-annamycin                                                                     | Doxorubicin                           | Anthracyclines                                           | ND    | Oncological disease                             | Phase II  |
| Larotaxel dehydrate (XRP-9881, RPR-109881A)                                     | Paclitaxel (10-deacetyl baccatin III) | Taxanes                                                  | ND    | Oncological disease                             | Phase III |
| LBM415 (NVP-PDF-713)                                                            | Actinonin                             | Hydroxamic acids & derivatives                           | ND    | Antibacterial                                   | Phase III |
| Lestaurtinib (CEP-701, KT-5555)                                                 | K252a (staurosporine)                 | Staurosporine alkaloids                                  | ND    | Oncological disease                             | Phase III |

|                                                                                |                                                          |                                                        |       |                                                 |           |
|--------------------------------------------------------------------------------|----------------------------------------------------------|--------------------------------------------------------|-------|-------------------------------------------------|-----------|
| Lobeline (alpha-lobeline)                                                      | Lobeline (alpha-lobeline)                                | Piperidine alkaloids                                   | N     | Neurological disease                            | Phase II  |
| Lurtotecan (NX211, GI-147211)                                                  | Camptothecin                                             | Camptothecin analogues                                 | ND    | Oncological disease                             | Phase II  |
| MAG-CPT (PNU166148)                                                            | Camptothecin                                             | Camptothecin analogues                                 | ND    | Oncological disease                             | Phase I   |
| Manoalide                                                                      | Manoalide                                                | Nonsteroidal sesterterpenoid                           | N     | Inflammatory disease                            | Phase II  |
| Maytansine                                                                     | Maytansine                                               | Ansamycins                                             | N     | Oncological disease                             | Phase II  |
| MBI-3253 (celgosivir, 6-O-butanoylcastanospermine, MX-3253)                    | Castanospermine                                          | Indolizine alkaloids                                   | ND    | Antiviral                                       | Phase II  |
| MC-1                                                                           | Vitamin B6                                               | -                                                      | ND    | Cardiovascular and metabolic disease            | Phase III |
| ME-1036 (CP5609)                                                               | Carbapenem                                               | $\beta$ -lactams                                       | ND    | Antibacterial                                   | Phase I   |
| Metastat (COL-3)                                                               | Tetracycline                                             | Tetracyclines                                          | S/NM  | Anticancer                                      | Phase II  |
| Methylnaltrexone (MOA-728)                                                     | Naltrexone                                               | Opiate alkaloids                                       | ND    | Neurological disease                            | Phase III |
| Midostaurin (PKC-412, CGP 41251, 4'-N-Benzoyl-staurosporine, CGP41251, PKC412) | Staurosporine                                            | Staurosporine alkaloids                                | ND    | Oncological disease                             | Phase II  |
| Migalastat (AT1001, 1-deoxygalactonojirimycin, 1-deoxygalactostatin)           | Galactonojirimycin (galactostatin)                       | Imino sugars                                           | ND    | Cardiovascular and metabolic disease            | Phase II  |
| Milataxel (MAC-321, TL-00139)                                                  | Paclitaxel                                               | Taxanes                                                | ND    | Oncological disease                             | Phase II  |
| Mitemcinal (mitemcinal fumarate, GM-611)                                       | Erythromycin                                             | Macrolides                                             | ND    | Cardiovascular and metabolic disease            | Phase II  |
| MK-0431                                                                        | MK-0431                                                  | -                                                      | S*/NM | Diabetes mellitus                               | Phase II  |
| MK-944a (L-756,423)                                                            | Pepstatin                                                | Hexa-peptide with unusual amino acid                   | ND    | Anti-HIV                                        | Phase I   |
| MLN2704 (a conjugate of DM1 and the antibody T-MAV)                            | Ansamitocin P-3                                          | Ansamycins                                             | ND    | Oncological disease                             | Phase II  |
| Moli1901 (duramycin, 2262U90)                                                  | Moli1901 (duramycin, 2262U90)                            | Large polycyclic peptides                              | N     | Antibacterial                                   | Phase II  |
| Morphine-6-glucuronide (M6G)                                                   | Morphine                                                 | Opiate alkaloids                                       | ND    | Neurological disease                            | Phase III |
| NB-506                                                                         | BE-13793C                                                | Indolocarbazoles                                       | ND    | Oncological disease                             | Phase II  |
| Nemorubicin (MMDX, PNU-152243A)                                                | Doxorubicin                                              | Anthracyclines                                         | ND    | Oncological disease                             | Phase II  |
| NIM 811 (SDZ NIM 811, cyclosporin 29, Melle-cyclosporin)                       | NIM 811 (SDZ NIM 811, cyclosporin 29, Melle-cyclosporin) | Four-substituted cyclosporine analogues                | ND    | Antiviral                                       | Phase I   |
| NK-105                                                                         | Paclitaxel                                               | Taxanes                                                | ND    | Oncological disease                             | Phase II  |
| NK-611                                                                         | Podophyllotoxin                                          | Podophyllotoxin lignans                                | ND    | Oncological disease                             | Phase II  |
| Noscapine (CB3304)                                                             | Noscapine                                                | Phthalideisoquinoline alkaloids                        | ND    | Oncological disease                             | Phase I   |
| NPI-0052 (salinosporamide A)                                                   | Salinosporamide A                                        | Salinosporamides                                       | ND    | Oncological disease                             | Phase I   |
| NPI-2358                                                                       | halimide                                                 | Dioxopiperazines                                       | ND    | Oncological disease                             | Phase I   |
| NV-52                                                                          | Isoflavone                                               | Isoflavones                                            | N     | Immunological, inflammatory and related disease | Phase II  |
| NVP-AUY922 (VER-52296)                                                         | Geldanamycin                                             | Ansamycins                                             | ND    | Anticancer                                      | Phase I   |
| NVP-DPP728                                                                     | NVP-DPP728                                               | Cyanopyrrolidides                                      | S*/NM | Diabetes mellitus                               | Phase II  |
| NVP-LAF237                                                                     | NVP-LAF237                                               | Thienopyrimidines containing a substituted alkyl group | S*/NM | Diabetes mellitus                               | Phase II  |

|                                                                                          |                                  |                                     |       |                                      |                |
|------------------------------------------------------------------------------------------|----------------------------------|-------------------------------------|-------|--------------------------------------|----------------|
| NVP-LAQ824                                                                               | Trapoxin                         | Cyclotetrapeptide                   | ND    | Oncological disease                  | Phase I        |
| NVP-LAQ824                                                                               | Trichostatin                     | Aniline dicarboxylic acids          | ND    | Oncological disease                  | Phase I        |
| NVP-LAQ824                                                                               | Psammaplin                       | Disulfide bromotyrosine derivatives | ND    | Oncological disease                  | Phase I        |
| Obatoclox (GX15-070)                                                                     | Streptorubin B (prodiginosin)    | Prodiginines                        | ND    | Oncological disease                  | Phase II       |
| Omacetaxine mepesuccinate                                                                | Homoharringtonine                | Cephalotaxine alkaloids             | ND    | Anticancer                           | Phase III      |
| Omapatrilat                                                                              | Teprotide                        | Nonapeptides                        | S*/NM | Hypertension                         | Phase II       |
| Omega-conotoxin CVID (AM336)                                                             | Omega-conotoxin CVID (AM336)     | Cyclic cysteine knot peptides       | N     | Neurological disease                 | Phase II       |
| Ortataxel (IDN-5109, BAY-59-8862)                                                        | Paclitaxel                       | Taxanes                             | ND    | Oncological disease                  | Phase II       |
| OSI-930                                                                                  | Zeatin (Cytokinins)              | Purine analogues adenine-type       | ND    | Anticancer                           | Phase I        |
| OXi4503 (combretastatin A-1 diphosphate)                                                 | Combretastatin A-1               | Dihydrostilbenoids                  | ND    | Oncological disease                  | Phase I        |
| Oxocalanolide                                                                            | Calanolide                       | Dipyrano-coumarins                  | ND    | Antiviral                            | Phase I        |
| PA-1050040 (PA-040)                                                                      | Betulinic acid                   | Steroid derivatives (steroid acids) | ND    | Anti-HIV                             | Phase I        |
| Paclitaxel poliglumex (a conjugate of paclitaxel with a biodegradable polyglutamic acid) | Paclitaxel                       | Taxanes                             | ND    | Oncological disease                  | Phase III      |
| Panobinostat (LBH-589)                                                                   | Psammaplin A                     | Disulfide bromotyrosine derivatives | ND    | Oncological disease                  | Phase III      |
| Patupilone (epothilone B, EPO-906)                                                       | Epothilone B                     | Polyketide macrolactones            | ND    | Oncological disease                  | Phase III      |
| PD-332991                                                                                | Zeatin (Cytokinins)              | Purine analogues adenine-type       | ND    | Anticancer                           | Phase I        |
| PDX101                                                                                   | Trichostatin                     | Aniline dicarboxylic acids          | ND    | Oncological disease                  | Phase I        |
| PEG-CPT (PEG-camptothecin, Prothecan)                                                    | Camptothecin                     | Camptothecin analogues              | ND    | Oncological disease                  | Phase II       |
| Perillyl alcohol (POH)                                                                   | Perillyl alcohol (POH)           | Monoterpenes                        | N     | Oncological disease                  | Phase II       |
| PF-3709270                                                                               | Carbapenem                       | $\beta$ -lactams                    | N     | Antibacterial                        | Phase I        |
| PF4548043 (KOS-2187)                                                                     | Erythromycin                     | Macrolides                          | ND    | Cardiovascular and metabolic disease | Phase I        |
| Phenethyl isothiocyanate (PEITC)                                                         | Phenethyl isothiocyanate (PEITC) | Isothiocyanates                     | N     | Oncological disease                  | Phase I        |
| Phenoxodiol                                                                              | Daidzein (isoflavone)            | Isoflavones                         | ND    | Oncological disease                  | Phase III      |
| Plitidepsin                                                                              | Plitidepsin (aplidin)            | Cyclic depsipeptides                | ND    | Oncological disease                  | Phase II       |
| PM00104/50                                                                               | Jorumycin                        | Macrolides                          | ND    | Oncological disease                  | Phase I        |
| PM02734                                                                                  | Kahalalide F                     | Depsipeptides                       | ND    | Oncological disease                  | Phase I        |
| Podophyllotoxin                                                                          | Podophyllotoxin                  | Podophyllotoxin lignans             | N     | Anticancer                           | Phase I        |
| PPL-100                                                                                  | PPL-100                          | -                                   | S/NM  | Antiviral                            | Phase I        |
| Prostratin                                                                               | Prostratin                       | Tigliane diterpenes                 | N     | Antiviral                            | Phase I        |
| Protoveratine A                                                                          | Protoveratine A                  | Veratrum alkaloids                  | N     | Hypertension                         | Clinical Trial |
| Protoveratine B                                                                          | Protoveratine B                  | Veratrum alkaloids                  | N     | Hypertension                         | Clinical Trial |
| PS-519                                                                                   | Lactacystin                      | $\gamma$ -lactams                   | ND    | acute stroke                         | Phase I        |
| PTK-0796 (MK-2764)                                                                       | Tetracycline                     | Tetracyclines                       | ND    | Antibacterial                        | Phase II       |
| Pyridoxamine (K-163)                                                                     | Vitamin B6                       | -                                   | ND    | Cardiovascular and                   | Phase II       |

|                                                                       |                                                                                          |                                  |       |                                                 |                |
|-----------------------------------------------------------------------|------------------------------------------------------------------------------------------|----------------------------------|-------|-------------------------------------------------|----------------|
|                                                                       |                                                                                          |                                  |       | metabolic disease                               |                |
| PZ-601 (SMP-601, SM-216601)                                           | Carbapenem                                                                               | $\beta$ -lactams                 | N     | Antibacterial                                   | Phase II       |
| QS-21A                                                                | QS-21A                                                                                   | Saponins                         | N     | Immunological disease                           | Phase II       |
| QS-21B                                                                | QS-21B                                                                                   | Saponins                         | N     | Immunological disease                           | Phase III      |
| Ramoplanin (ramoplanin factor A2)                                     | Ramoplanin                                                                               | Glycolipodepsipeptides           | ND    | Antibacterial                                   | Phase III      |
| Retaspimycin (IPI-504, 17-AAG hydroquinone salt)                      | Geldanamycin                                                                             | Ansamycins                       | ND    | Oncological disease                             | Phase II       |
| Romidepsin (depsipeptide, FR-901228, FK-228)                          | Romidepsin                                                                               | Depsipeptide cyclic structure    | ND    | Oncological disease                             | Phase III      |
| Rostafuroxin (PST 2238)                                               | Ouabain                                                                                  | Cardiac glycosides               | ND    | Cardiovascular and metabolic disease            | Phase II       |
| Rubitecan (9-nitrocamptothecin, 9-NC, RFS2000, 9-Nitro-CPT)           | Camptothecin                                                                             | Camptothecin analogues           | ND    | Anticancer                                      | Phase III      |
| Ruboxistaurin (LY333531)                                              | Staurosporine                                                                            | Staurosporine alkaloids          | ND    | Cardiovascular and metabolic disease            | Phase III      |
| RWJ-442831                                                            | Cephalosporin nucleus, 7-aminocephalosporanic acid (7-ACA), derived from cephalosporin C | Glycopeptides; Cephalosporins    | ND    | Antibacterial                                   | Phase I        |
| S23906-1                                                              | Acronycine                                                                               | Acridone alkaloids               | ND    | Oncological disease                             | Phase I        |
| Sabarubicin (MEN-10755)                                               | Doxorubicin                                                                              | Anthracyclines                   | ND    | Oncological disease                             | Phase II       |
| Sagopilone (ZK-EPO, ZK-219477)                                        | Epothilone B                                                                             | Polyketide macrolactones         | ND    | Oncological disease                             | Phase II       |
| SCH 530348                                                            | Himbacine                                                                                | Tetracyclic piperidine alkaloids | ND    | Cardiovascular and metabolic disease            | Phase III      |
| Scillaren A                                                           | Scillaren A                                                                              | Scilla glycosides                | N     | Cancer                                          | Clinical Trial |
| Seliciclib (Rosco, R-roscovitine, CYC202)                             | Zeatin (Cytokinins)                                                                      | Purine analogues adenine-type    | ND    | Oncological disease                             | Phase II       |
| Silatecan (DB-67, 7-silylcamptothecin, AR-67)                         | Camptothecin                                                                             | Camptothecin analogues           | ND    | Oncological disease                             | Phase I        |
| SN2310                                                                | Camptothecin                                                                             | Camptothecin analogues           | ND    | Oncological disease                             | Phase I        |
| Soblidotin (YHI-501, TZT-1027, auristatin PE)                         | Dolastatin 10                                                                            | Peptide                          | ND    | Oncological disease                             | Phase II       |
| SPP100                                                                | SPP100                                                                                   | Azaindole scaffolds              | S*/NM | Hypertension                                    | Phase III      |
| Squalamine                                                            | Squalamine                                                                               | Aminosterols                     | ND    | Oncological disease                             | Phase III      |
| SU-14813                                                              | Zeatin (Cytokinins)                                                                      | Purine analogues adenine-type    | ND    | Anticancer                                      | Phase II       |
| SU-6668                                                               | Zeatin (Cytokinins)                                                                      | Purine analogues adenine-type    | ND    | Anticancer                                      | Phase II       |
| Sulopenem (CP-70429)                                                  | Carbapenem                                                                               | $\beta$ -lactams                 | N     | Antibacterial                                   | Phase I        |
| TAFA-93                                                               | Sirolimus (rapamycin)                                                                    | Macrolides                       | ND    | Immunological, inflammatory and related disease | Phase I        |
| Tafluposide                                                           | Epipodophyllotoxin                                                                       | Podophyllotoxin lignans          | ND    | Oncological disease                             | Phase I        |
| Tanespimycin (17-AAG, KOS-953, NSC-330507, 17-allylaminogeldanamycin) | Geldanamycin                                                                             | Ansamycins                       | ND    | Oncological disease                             | Phase III      |
| Taribavirin (ribamidine)                                              | Showdomycin                                                                              | Imidazole ribosides              | ND    | Antiviral                                       | Phase II       |
| Taribavirin (ribamidine)                                              | Pyrazomycin                                                                              | C-nucleosides                    | ND    | Antiviral                                       | Phase II       |
| Tasidotin (synthadotin, ILX-651)                                      | Dolastatin 15                                                                            | Depsipeptides                    | ND    | Oncological disease                             | Phase II       |
| TD-1792                                                               | Cephalosporin in                                                                         | Glycopeptides; Cephalosporins    | ND    | Antibacterial                                   | Phase II       |

|                                                                                                   |                                                                            |                                             |       |                                                 |           |
|---------------------------------------------------------------------------------------------------|----------------------------------------------------------------------------|---------------------------------------------|-------|-------------------------------------------------|-----------|
|                                                                                                   | vancomycin-cephalosporin                                                   |                                             |       |                                                 |           |
| Tebipenem pivoxil (ME-1211, L-084)                                                                | Carbapenem                                                                 | $\beta$ -lactams                            | ND    | Antibacterial                                   | Phase III |
| Tesetaxel (DJ-927)                                                                                | Paclitaxel                                                                 | Taxanes                                     | ND    | Oncological disease                             | Phase II  |
| Tetrodotoxin (anhydrotetrodotoxin 4-epitetrodotoxin, tetrodonic acid, TTX)                        | Tetrodotoxin (anhydrotetrodotoxin 4-epitetrodotoxin, tetrodonic acid, TTX) | Guanidinium-pyrimidine-cyclohexane scaffold | N     | Neurological disease                            | Phase III |
| TMC-114                                                                                           | TMC-114                                                                    | Tetrahydrofuranyl-urethane analogues        | S/NM  | Antiviral                                       | Phase III |
| TNP-470 (takeda neoplastic product 470)                                                           | Fumagillin                                                                 | Bisabolane sesquiterpenes                   | ND    | Oncological disease                             | Phase III |
| Tomopenem (CS-023, RO4908463, R1558)                                                              | Carbapenem                                                                 | $\beta$ -lactams                            | ND    | Antibacterial                                   | Phase II  |
| TPI-287 (NBT-287)                                                                                 | Paclitaxel                                                                 | Taxanes                                     | ND    | Oncological disease                             | Phase II  |
| Trastuzumab-DM1 (T-MCC-DM1) (a conjugate of a humanized monoclonal antibody trastuzumab with DM1) | Ansamitocin P-3                                                            | Ansamycins                                  | ND    | Oncological disease                             | Phase II  |
| Triphendiol (NV-196), analogue of phenoxodiol                                                     | Isoflavone                                                                 | Isoflavones                                 | ND    | Oncological disease                             | Phase I   |
| Trodusquemine (MSI-1436)                                                                          | Trodusquemine (MSI-1436)                                                   | Aminosterols                                | N     | Cardiovascular and metabolic disease            | Phase I   |
| TS-033                                                                                            | Phlorizin                                                                  | Dihydrochalcones                            | ND    | Neurological disease                            | Phase II  |
| Vandetanib (zactima, ZD-6474)                                                                     | Zeatin (Cytokinins)                                                        | Purine analogues adenine-type               | ND    | Anticancer                                      | Phase III |
| Vatalanib (PTK787, ZK222584)                                                                      | Zeatin (Cytokinins)                                                        | Purine analogues adenine-type               | ND    | Anticancer                                      | Phase III |
| Vinflunine (vinflunine ditartrate)                                                                | Vinblastine                                                                | Vinca alkaloids                             | ND    | Oncological disease                             | Phase III |
| Voclosporin (ISA-247, R1524)                                                                      | Cyclosporin A (cyclosporine A)                                             | Nonribosomal peptide cyclic structure       | ND    | Immunological, inflammatory and related disease | Phase II  |
| Vorinostat                                                                                        | Trichostatin                                                               | Aniline dicarboxylic acids                  | ND    | Anticancer                                      | Phase II  |
| VX-950                                                                                            | VX-950                                                                     | Tri-peptides                                | S*/NM | Hepatitis C                                     | Phase II  |
| XR-9051                                                                                           | XR-334                                                                     | Diketopiperazines                           | ND    | Oncological disease                             | Phase I   |
| YM-543                                                                                            | Phlorizin                                                                  | Dihydrochalcones                            | ND    | Neurological disease                            | Phase II  |
| Ziconotide                                                                                        | Ziconotide                                                                 | Conotoxins                                  | N     | Chronic pain                                    | Phase III |

**Supplementary Table S4** Statistics of the 62 drug lead productive scaffolds in the scaffold hunter derived molecular scaffold trees of 134,097 natural products and 411 natural product leads. These drug lead productive scaffolds are labeled as DS1 to DS62.

| Drug Lead Productive Scaffold or Scaffold Parent-Child Sub-branch (Branch) | Drug-Productive Scaffold(s) in DS                                                    | No of Scaffolds | No of Drug Leads (Approved/Clinical Trial) | No of Derived Drugs (Approved/Clinical Trial) |
|----------------------------------------------------------------------------|--------------------------------------------------------------------------------------|-----------------|--------------------------------------------|-----------------------------------------------|
| DS1 (1)                                                                    | 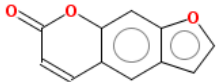    | 1               | 2 (2/0)                                    | 3 (3/0)                                       |
| DS2 (2)                                                                    |   | 1               | 2 (1/2)                                    | 5 (2/3)                                       |
| DS3 (2)                                                                    |   | 2               | 3 (3/0)                                    | 5 (5/0)                                       |
| DS4 (2)                                                                    |   | 2               | 3 (3/0)                                    | 6 (6/0)                                       |
| DS5 (2)                                                                    |  | 3               | 4 (4/2)                                    | 18 (16/2)                                     |

|          |                                                                                      |    |           |            |
|----------|--------------------------------------------------------------------------------------|----|-----------|------------|
| DS6 (3)  |     | 1  | 3 (3/0)   | 3 (3/0)    |
| DS7 (3)  |     | 2  | 2 (1/1)   | 2 (1/1)    |
| DS8 (3)  |     | 2  | 2 (2/0)   | 2 (2/0)    |
| DS9 (3)  |    | 1  | 2 (2/0)   | 3 (3/0)    |
| DS10 (3) |  | 17 | 39 (32/8) | 84 (72/12) |



|             |                                                                                     |   |         |           |
|-------------|-------------------------------------------------------------------------------------|---|---------|-----------|
|             | 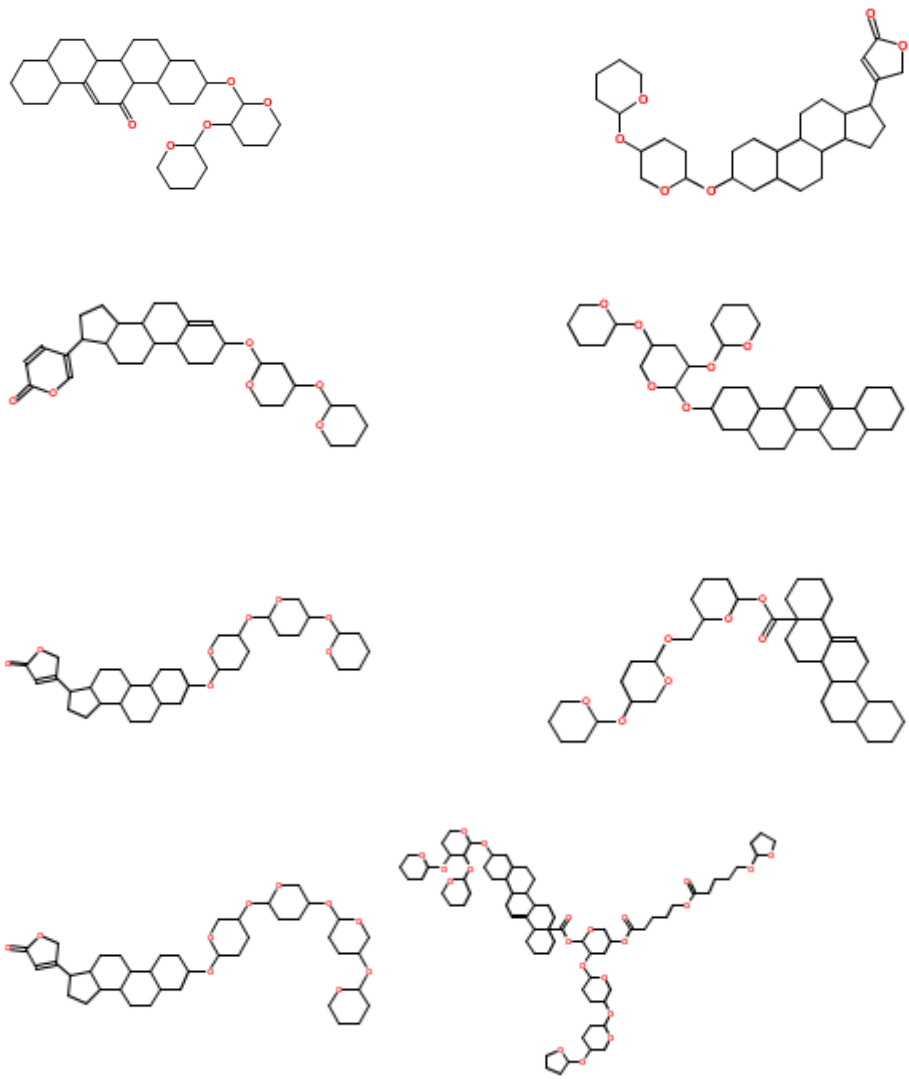 |   |         |           |
| DS11<br>(4) |  | 1 | 2 (1/1) | 4 (3/1)   |
| DS12<br>(4) |  | 3 | 3 (3/0) | 21 (21/0) |
| DS13<br>(4) |  | 3 | 5 (5/0) | 11 (11/0) |

|             |                                                                                      |   |         |           |
|-------------|--------------------------------------------------------------------------------------|---|---------|-----------|
| DS14<br>(4) | 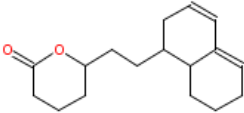    | 1 | 2 (2/0) | 7 (7/0)   |
| DS15<br>(5) |     | 1 | 3 (3/0) | 5 (5/0)   |
| DS16<br>(5) |   | 4 | 4 (4/0) | 5 (5/0)   |
| DS17<br>(5) |  | 3 | 7 (7/0) | 11 (11/0) |
| DS18<br>(5) |  | 4 | 4 (4/0) | 14 (14/0) |

|             |                                                                                      |   |         |           |
|-------------|--------------------------------------------------------------------------------------|---|---------|-----------|
| DS19<br>(5) | 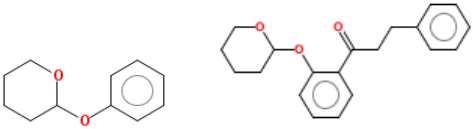    | 2 | 2 (1/1) | 5 (1/4)   |
| DS20<br>(6) |     | 1 | 2 (1/2) | 6 (1/5)   |
| DS21<br>(7) |     | 2 | 2 (2/1) | 3 (2/1)   |
| DS22<br>(8) |   | 4 | 5 (5/0) | 5 (5/0)   |
| DS23<br>(9) |  | 3 | 3 (3/0) | 8 (8/0)   |
| DS24<br>(9) |   | 1 | 7 (4/3) | 15 (10/5) |

|              |                                                                                     |   |         |          |
|--------------|-------------------------------------------------------------------------------------|---|---------|----------|
| DS25<br>(9)  | 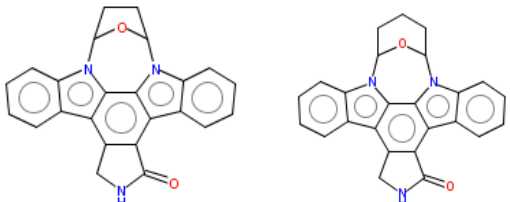   | 2 | 2 (1/2) | 11 (3/8) |
| DS26<br>(10) |    | 1 | 2 (2/1) | 3 (2/1)  |
| DS27<br>(11) |    | 2 | 2 (1/1) | 3 (1/2)  |
| DS28<br>(12) |   | 1 | 4 (4/1) | 7 (5/2)  |
| DS29<br>(12) |  | 2 | 2 (2/1) | 3 (2/1)  |
| DS30<br>(13) |  | 1 | 2 (2/0) | 3 (3/0)  |
| DS31<br>(13) |  | 2 | 5 (5/0) | 9 (9/0)  |
| DS32<br>(13) |  | 1 | 4 (4/0) | 7 (7/0)  |

|              |                                                                                      |   |         |               |
|--------------|--------------------------------------------------------------------------------------|---|---------|---------------|
| DS33<br>(14) | 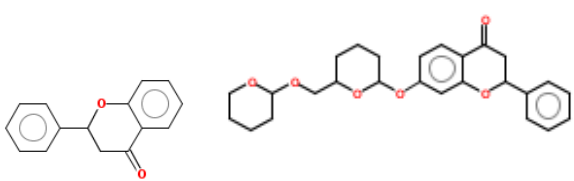    | 2 | 2 (2/0) | 3 (3/0)       |
| DS34<br>(15) |     | 2 | 3 (3/1) | 13 (9/4)      |
| DS35<br>(16) |     | 1 | 3 (3/0) | 9 (9/0)       |
| DS36<br>(16) |   | 2 | 2 (2/0) | 2 (2/0)       |
| DS37<br>(17) |   | 1 | 3 (3/0) | 5 (5/0)       |
| DS38<br>(17) |  | 3 | 4 (3/2) | 33<br>(11/22) |
| DS39<br>(18) |   | 2 | 2 (2/0) | 2 (2/0)       |

|              |                                                                                     |   |         |           |
|--------------|-------------------------------------------------------------------------------------|---|---------|-----------|
| DS40<br>(19) | 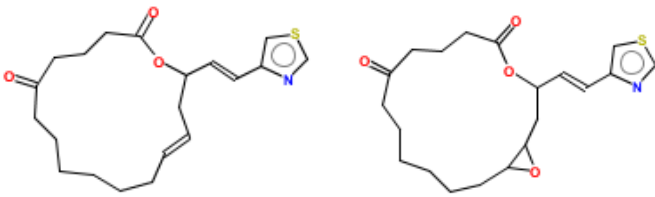   | 2 | 2 (1/2) | 8 (1/7)   |
| DS41<br>(20) |    | 1 | 2 (2/1) | 56 (51/5) |
| DS42<br>(20) |    | 1 | 2 (1/2) | 15 (8/7)  |
| DS43<br>(20) |    | 1 | 3 (3/0) | 31 (31/0) |
| DS44<br>(21) |  | 1 | 4 (4/1) | 13 (10/3) |
| DS45<br>(21) |  | 1 | 2 (2/0) | 3 (3/0)   |
| DS46<br>(22) |  | 1 | 2 (2/0) | 2 (2/0)   |

|              |                                                                                     |   |         |         |
|--------------|-------------------------------------------------------------------------------------|---|---------|---------|
| DS47<br>(23) | 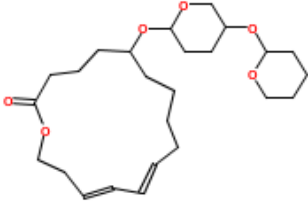   | 1 | 2 (2/1) | 5 (4/1) |
| DS48<br>(24) |    | 1 | 4 (4/0) | 7 (7/0) |
| DS49<br>(25) |    | 1 | 2 (2/0) | 2 (2/0) |
| DS50<br>(26) |   | 1 | 2 (1/1) | 2 (1/1) |
| DS51<br>(27) |  | 1 | 3 (3/0) | 7 (7/0) |
| DS52<br>(28) |  | 1 | 2 (2/0) | 2 (2/0) |
| DS53<br>(29) |  | 1 | 2 (2/1) | 6 (4/2) |

|              |                                                                                     |   |           |           |
|--------------|-------------------------------------------------------------------------------------|---|-----------|-----------|
| DS54<br>(30) | 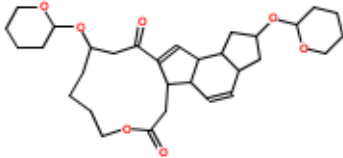   | 1 | 2 (2/0)   | 1 (1/0)   |
| DS55<br>(31) |    | 1 | 3 (2/1)   | 4 (3/1)   |
| DS56<br>(32) |    | 1 | 2 (2/0)   | 2 (2/0)   |
| DS57<br>(33) |  | 1 | 2 (2/0)   | 7 (7/0)   |
| DS58<br>(34) |  | 1 | 2 (1/2)   | 6 (2/4)   |
| DS59<br>(35) |  | 1 | 21 (18/5) | 51 (43/8) |
| DS60<br>(36) |  | 1 | 2 (1/1)   | 2 (1/1)   |
| DS61<br>(37) |  | 1 | 2 (2/0)   | 12 (12/0) |



|              |                                                                                   |   |         |         |
|--------------|-----------------------------------------------------------------------------------|---|---------|---------|
| DS62<br>(38) |  | 1 | 2 (2/1) | 4 (3/1) |
|--------------|-----------------------------------------------------------------------------------|---|---------|---------|

**Supplementary Table S5** Statistics of the 33 main branches of the molecular-fingerprint Tanimoto-coefficient similarity clustering tree of the natural product chemical space represented by 137,836 natural products and 442 natural product leads. These branches are labeled as Branch1 to Branch33.

| Main Branch | No of Natural Products | No of Drug Leads (Approved/Clinical Trial) | No of Derived Drugs (Approved/Clinical Trial) |
|-------------|------------------------|--------------------------------------------|-----------------------------------------------|
| Branch1     | 801                    | 13 (12/2)                                  | 17 (15/2)                                     |
| Branch2     | 329                    | 1 (1/0)                                    | 1 (1/0)                                       |
| Branch3     | 3937                   | 72 (59/18)                                 | 214 (186/28)                                  |
| Branch4     | 848                    | 29 (25/6)                                  | 84 (53/31)                                    |
| Branch5     | 809                    | 0 (0/0)                                    | 0 (0/0)                                       |
| Branch6     | 1813                   | 2 (1/1)                                    | 3 (2/1)                                       |
| Branch7     | 9553                   | 9 (9/1)                                    | 36 (20/16)                                    |
| Branch8     | 1617                   | 3 (2/1)                                    | 5 (4/1)                                       |
| Branch9     | 4594                   | 65 (55/17)                                 | 161 (124/37)                                  |
| Branch10    | 3224                   | 22 (18/5)                                  | 43 (38/5)                                     |
| Branch11    | 1408                   | 5 (5/0)                                    | 5 (5/0)                                       |
| Branch12    | 7837                   | 29 (24/7)                                  | 51 (39/12)                                    |
| Branch13    | 2286                   | 5 (5/1)                                    | 14 (12/2)                                     |
| Branch14    | 5966                   | 27 (17/11)                                 | 42 (28/14)                                    |
| Branch15    | 9746                   | 16 (6/11)                                  | 19 (7/12)                                     |
| Branch16    | 3763                   | 14 (12/4)                                  | 48 (42/6)                                     |
| Branch17    | 7323                   | 25 (17/10)                                 | 50 (30/20)                                    |
| Branch18    | 3868                   | 3 (2/1)                                    | 3 (2/1)                                       |
| Branch19    | 1136                   | 0 (0/0)                                    | 0 (0/0)                                       |
| Branch20    | 9754                   | 23 (19/7)                                  | 72 (50/22)                                    |
| Branch21    | 2858                   | 7 (7/1)                                    | 11 (9/2)                                      |
| Branch22    | 8360                   | 7 (2/5)                                    | 11 (2/9)                                      |
| Branch23    | 164                    | 0 (0/0)                                    | 0 (0/0)                                       |
| Branch24    | 6264                   | 16 (14/6)                                  | 33 (26/7)                                     |
| Branch25    | 8973                   | 1 (0/1)                                    | 1 (0/1)                                       |
| Branch26    | 1262                   | 8 (7/3)                                    | 21 (14/7)                                     |
| Branch27    | 2027                   | 3 (2/1)                                    | 3 (2/1)                                       |
| Branch28    | 6496                   | 12 (8/4)                                   | 21 (13/8)                                     |
| Branch29    | 643                    | 0 (0/0)                                    | 0 (0/0)                                       |
| Branch30    | 3457                   | 4 (2/3)                                    | 8 (3/5)                                       |
| Branch31    | 3879                   | 1 (1/0)                                    | 1 (1/0)                                       |
| Branch32    | 8696                   | 16 (13/6)                                  | 37 (24/13)                                    |
| Branch33    | 4145                   | 4 (3/2)                                    | 5 (3/2)                                       |

**Supplementary Table S6** Statistics of the 60 drug lead productive clusters in the molecular-fingerprint Tanimoto-coefficient similarity clustering tree of the natural product chemical space represented by 137,836 natural products and 442 natural product leads. These clusters are labeled as DC1 to DC60.

| Drug Lead Productive Cluster (Main Branch) | No of NPs | No of Drug Leads (Approved/Clinical Trial) | No of Derived Drugs (Approved/Clinical Trial) | Drug Lead Molecular Scaffold Groups                                           | Target Site SuperClass (TS)                                 | TS Id | Target Site Class (TC)                                      | TC Id |
|--------------------------------------------|-----------|--------------------------------------------|-----------------------------------------------|-------------------------------------------------------------------------------|-------------------------------------------------------------|-------|-------------------------------------------------------------|-------|
| DC1 (1)                                    | 11        | 2 (2/0)                                    | 3 (3/0)                                       | Uracil analogs                                                                | nucleobase binding sites                                    | TS2   | Pyrimidine metabolism enzymes substrate binding sites       | TC3   |
| DC2 (1)                                    | 4         | 2 (2/0)                                    | 2 (2/0)                                       | Tuberactinomycin family peptides                                              | aminoacyl-tRNA binding sites                                | TS6   | ribosome 30s subunit aminoacyl-tRNA binding sites           | TC18  |
| DC3 (1)                                    | 28        | 2 (2/0)                                    | 3 (3/0)                                       | Sulfur-containing amino acids                                                 | fatty acid, cannabinoid, eicosanoid, retinoid binding sites | TS15  | fatty acid metabolism enzyme substrate sites                | TC36  |
| DC4 (3)                                    | 225       | 4 (4/2)                                    | 14 (12/2)                                     | linear derivatives of amino acids with very short acyclic hydroxyl side chain | oligopeptide binding sites                                  | TS9   | serine endopeptidase substrate binding sites                | TC28  |
|                                            |           |                                            |                                               |                                                                               |                                                             |       | proteasome substrate binding sites                          | TC27  |
| DC5 (3)                                    | 225       | 19 (19/0)                                  | 32 (32/0)                                     | Pyrimidine nucleoside analogs, Aminoglycosides, Peptidoglycans                | nucleoside phosphate binding sites                          | TS4   | DNA metabolism enzymes nucleoside phosphate binding sites   | TC7   |
|                                            |           |                                            |                                               |                                                                               | aminoacyl-tRNA binding sites                                | TS6   | ribosome 30s subunit aminoacyl-tRNA binding sites           | TC18  |
| DC6 (3)                                    | 197       | 5 (3/3)                                    | 8 (4/4)                                       | Imino sugars                                                                  | aminoacyl-tRNA binding sites                                | TS6   | ribosome 30s subunit aminoacyl-tRNA binding sites           | TC18  |
|                                            |           |                                            |                                               |                                                                               | saccharide binding sites                                    | TS12  | monosaccharide metabolism enzyme binding sites              | TC31  |
| DC7 (3)                                    | 217       | 15 (15/0)                                  | 23 (23/0)                                     | Amino acids with acyclic hydroxyl side chain & derivatives                    | amino acid binding sites                                    | TS8   | amino acid receptors ligand binding sites                   | TC20  |
|                                            |           |                                            |                                               |                                                                               |                                                             |       | amino acid metabolism enzymes substrates binding sites      | TC21  |
| DC8 (3)                                    | 92        | 6 (6/2)                                    | 96 (90/6)                                     | Beta-lactams                                                                  | peptidoglycan binding sites                                 | TS10  | $\beta$ -lactam binding protein peptidoglycan binding sites | TC29  |
| DC9 (3)                                    | 258       | 7 (3/4)                                    | 8 (4/4)                                       | Larger oligopeptides                                                          | amino acid binding sites                                    | TS8   | amino acid receptors ligand binding sites                   | TC20  |
|                                            |           |                                            |                                               |                                                                               | oligopeptide binding sites                                  | TS9   | proteasome substrate binding sites                          | TC27  |
| DC10 (3)                                   | 237       | 5 (5/0)                                    | 17 (17/0)                                     | Glycosaminoglycans, glucosamines, Lincosamides & derivatives                  | oligopeptide binding sites                                  | TS9   | serine endopeptidase substrate binding sites                | TC28  |
| DC11 (4)                                   | 67        | 4 (1/4)                                    | 10 (1/9)                                      | Polyketide macrolactones, Carbapenems, Sulfonamides                           | microtubule sites                                           | TS17  | microtubule laulimalide/peloruside site                     | TC41  |
| DC12 (4)                                   | 180       | 5 (5/0)                                    | 9 (9/0)                                       | Purine base analogs, modified purine base analogs                             | nucleoside binding sites                                    | TS3   | purine nucleoside receptor ligand binding sites             | TC5   |
|                                            |           |                                            |                                               |                                                                               | nucleoside phosphate                                        | TS4   | DNA metabolism enzymes                                      | TC7   |

|              |          |              |               |                                                                              | binding sites                                               |      | nucleoside phosphate binding sites                                   |      |
|--------------|----------|--------------|---------------|------------------------------------------------------------------------------|-------------------------------------------------------------|------|----------------------------------------------------------------------|------|
| DC13<br>(4)  | 264      | 18<br>(17/2) | 61<br>(39/22) | Purine nucleoside analogs, Imidazole analogs, Imidazole oligopeptide hybrids | nucleoside binding sites                                    | TS3  | purine nucleoside receptor ligand binding sites                      | TC5  |
|              |          |              |               |                                                                              |                                                             |      | purine nucleoside metabolism enzyme substrate binding sites          | TC6  |
|              |          |              |               |                                                                              | nucleoside phosphate binding sites                          | TS4  | nucleoside phosphate receptor ligand binding sites                   | TC9  |
|              |          |              |               |                                                                              |                                                             |      | DNA metabolism enzymes nucleoside phosphate binding sites            | TC7  |
| DC14<br>(7)  | 410<br>4 | 5 (5/1)      | 31<br>(15/16) | Larger indole alkaloids                                                      | amine binding sites                                         | TS1  | amine receptors ligand binding sites                                 | TC1  |
|              |          |              |               |                                                                              | amine transporters substrate binding sites                  |      | TC2                                                                  |      |
|              |          |              |               |                                                                              | oligopeptide binding sites                                  | TS9  | exopeptidase substrate binding sites                                 | TC23 |
| DC15<br>(12) | 71       | 3 (2/1)      | 5 (4/1)       | Mono-, Sesqui-, Di-terpenes with simple ring scaffolds                       | fatty acid, cannabinoid, eicosanoid, retinoid binding sites | TS15 | retinoid receptor ligand binding sites                               | TC37 |
| DC16<br>(13) | 11       | 3 (2/3)      | 9 (3/6)       | Small cyclic peptides                                                        | amino acid phosphate binding sites                          | TS7  | phosphatase substrate binding sites                                  | TC19 |
|              |          |              |               |                                                                              | oligopeptide binding sites                                  | TS9  | oligopeptide histone tail metabolism enzymes substrate binding sites | TC24 |
| DC17<br>(14) | 117      | 16<br>(15/4) | 43<br>(29/14) | Macrolides, Polyenes, Spinosyns, Acarviosins                                 | amino acid phosphate binding sites                          | TS7  | phosphatase substrate binding sites                                  | TC19 |
|              |          |              |               |                                                                              | oligopeptide binding sites                                  | TS9  | ribosome 23S rRNA peptidyl transferase sites                         | TC25 |
|              |          |              |               |                                                                              | lipopolysaccharide sites                                    | TS14 | outer membrane lipopolysaccharide sites                              | TC35 |
| DC18<br>(14) | 217      | 2 (2/0)      | 2 (2/0)       | Steroidal alkaloids, Steroidal glycoalkaloids                                | steroid binding sites                                       | TS19 | Nuclear receptor ligand binding sites                                | TC44 |
| DC19<br>(14) | 546      | 37<br>(32/5) | 93<br>(85/8)  | Steroids & derivatives                                                       | steroid binding sites                                       | TS19 | Nuclear receptor ligand binding sites                                | TC44 |
| DC20<br>(14) | 34       | 2 (2/0)      | 2 (2/0)       | Leukotrienes                                                                 |                                                             |      |                                                                      |      |
| DC21<br>(14) | 423      | 9 (8/1)      | 27<br>(26/1)  | Fatty acids & derivatives, Prostanoids                                       | fatty acid, cannabinoid, eicosanoid, retinoid binding sites | TS15 | retinoid receptor ligand binding sites                               | TC37 |
|              |          |              |               |                                                                              | coenzyme A & analog binding sites                           | TS16 | coenzyme A & analog metabolism enzymes substrate binding sites       | TC40 |
| DC22<br>(15) | 185      | 3 (2/1)      | 3 (2/1)       | Sesquiterpene lactones. Meroterpenoids                                       | oligopeptide binding sites                                  | TS9  | exopeptidase substrate binding sites                                 | TC23 |
| DC23<br>(16) | 782      | 2 (1/1)      | 2 (1/1)       | Lone-tailed phosphate esters, Long tailed polyketide-derived acids           | nucleoside phosphate binding sites                          | TS4  | DNA metabolism enzymes nucleoside phosphate binding sites            | TC7  |
|              |          |              |               |                                                                              |                                                             |      | RNA metabolism enzymes nucleoside phosphate binding sites            | TC8  |
| DC24<br>(16) | 259      | 5 (5/0)      | 5 (5/0)       | Oligo-, Poly-, Cyclic-saccharides                                            | cyclic oligosaccharide drug delivery systems                | TS13 | cyclodextrin drug delivery systems                                   | TC34 |
| DC25<br>(17) | 3        | 2 (2/0)      | 7 (7/0)       | Secosteroids                                                                 | steroid binding site                                        | TS19 | Nuclear receptor ligand binding sites                                | TC44 |
| DC26<br>(17) | 9        | 2 (2/0)      | 7 (7/0)       | Statins                                                                      | coenzyme A & analog binding sites                           | TS16 | coenzyme A & analog metabolism enzymes substrate binding sites       | TC40 |

|              |          |          |           |                                                                                                            |                                    |      |                                                                      |      |
|--------------|----------|----------|-----------|------------------------------------------------------------------------------------------------------------|------------------------------------|------|----------------------------------------------------------------------|------|
| DC27<br>(17) | 139<br>4 | 8 (4/5)  | 13 (4/9)  | Sesqui-, Di-terpenes with steroid-like multi-ring scaffolds                                                | nucleoside phosphate binding sites | TS4  | heat shock protein nucleoside phosphate binding sites                | TC16 |
|              |          |          |           |                                                                                                            | oligopeptide binding sites         | TS9  | ribosome 23S rRNA peptidyl transferase sites                         | TC25 |
| DC28<br>(17) | 176      | 8 (8/1)  | 13 (12/1) | Cardiac glycosides                                                                                         | nucleoside phosphate binding sites | TS4  | nucleoside phosphate metabolism enzymes substrate binding sites      | TC10 |
| DC29<br>(20) | 169<br>6 | 7 (6/1)  | 9 (7/2)   | Saponins, Triterpenoid glycosides, Macrocytic lactones                                                     | nucleoside phosphate binding sites | TS4  | steroid metabolism enzyme nucleoside phosphates binding sites        | TC12 |
|              |          |          |           |                                                                                                            |                                    |      | calcium channel DHP binding site                                     | TC14 |
|              |          |          |           |                                                                                                            |                                    |      | chloride channel CBS domain                                          | TC15 |
| DC30<br>(20) | 30       | 2 (2/0)  | 2 (2/0)   | $\beta$ -triketones , Cyclic ketones of the hydroaromatic terpene group                                    |                                    |      |                                                                      |      |
| DC31<br>(8)  | 399      | 5 (4/1)  | 9 (8/1)   | Phenethylamines & Benzylamines with a shorter side-chain, Chalconoids                                      | amine binding sites                | TS1  | amine receptors ligand binding sites                                 | TC1  |
|              |          |          |           |                                                                                                            |                                    |      | amine transporters substrate binding sites                           | TC2  |
| DC32<br>(9)  | 334      | 5 (3/2)  | 6 (4/2)   | Pyridine alkaloids                                                                                         | nucleoside phosphate binding sites | TS4  | ATP-gated channel ligand binding sites                               | TC13 |
| DC33<br>(9)  | 393      | 4 (4/1)  | 16 (13/3) | Nitrobenzene analogs, benzene-1,4-dicarboxylic acids & $\beta$ -triketones with an intermediate side-chain | nucleoside phosphate binding sites | TS4  | ATP-gated channel ligand binding sites                               | TC13 |
|              |          |          |           |                                                                                                            | oligopeptide binding sites         | TS9  | ribosome 23S rRNA peptidyl transferase sites                         | TC25 |
| DC34<br>(9)  | 331      | 3 (2/1)  | 3 (2/1)   | Phenethylamines with a longer side-chain                                                                   | oligopeptide binding sites         | TS9  | exopeptidase substrate binding sites                                 | TC23 |
| DC35<br>(9)  | 67       | 6 (2/4)  | 8 (2/6)   | Depsipeptides, Cyclotetrapeptides, Nonapeptides & analogs                                                  | oligopeptide binding sites         | TS9  | oligopeptide histone tail metabolism enzymes substrate binding sites | TC24 |
|              |          |          |           |                                                                                                            |                                    |      | vasoactive peptide receptor binding sites                            | TC26 |
|              |          |          |           |                                                                                                            | Sites within peptidoglycans        | TS11 | cell wall peptidoglycan sites                                        | TC30 |
| DC36<br>(20) | 265      | 10 (5/6) | 13 (6/7)  | Large cyclic peptides                                                                                      | nucleoside phosphate binding sites | TS4  | calcium channel DHP binding site                                     | TC14 |
|              |          |          |           |                                                                                                            | Sites within peptidoglycans        | TS11 | cell wall peptidoglycan sites                                        | TC30 |
|              |          |          |           |                                                                                                            | saccharide binding sites           | TS12 | polysaccharide metabolism enzyme substrates binding sites            | TC33 |
|              |          |          |           |                                                                                                            | lipopolysaccharide sites           | TS14 | outer membrane lipopolysaccharide sites                              | TC35 |
| DC37<br>(21) | 135      | 3 (3/1)  | 5 (3/2)   | Streptogramins                                                                                             | oligopeptide binding sites         | TS9  | ribosome 23S rRNA peptidyl transferase sites                         | TC25 |
| DC38<br>(21) | 33       | 7 (7/1)  | 34 (32/2) | Intermediate-sized linear and cyclic peptides                                                              | oligopeptide binding sites         | TS9  | exopeptidase substrate binding sites                                 | TC23 |
|              |          |          |           |                                                                                                            |                                    |      | Neuropeptide receptor ligand binding sites                           | TC22 |
|              |          |          |           |                                                                                                            | lipopolysaccharide sites           | TS14 | outer membrane lipopolysaccharide sites                              | TC35 |
| DC39<br>(24) | 7        | 3 (1/3)  | 13 (3/10) | Staurosporine alkaloids                                                                                    | nucleoside phosphate binding sites | TS4  | kinase ATP binding sites                                             | TC11 |
|              |          |          |           |                                                                                                            |                                    |      | DNA metabolism enzymes nucleoside phosphate binding sites            | TC7  |
| DC40         | 519      | 7 (5/3)  | 12 (8/4)  | Porphyrins, Reduced                                                                                        | amine binding sites                | TS1  | amine receptors ligand binding                                       | TC1  |

|              |          |         |              |                                                                                                                     |                                                                                                                     |                   |                                                                                                                                                                                   |                      |
|--------------|----------|---------|--------------|---------------------------------------------------------------------------------------------------------------------|---------------------------------------------------------------------------------------------------------------------|-------------------|-----------------------------------------------------------------------------------------------------------------------------------------------------------------------------------|----------------------|
| (24)         |          |         |              | porphyrins,<br>Prodiginines,<br>Ergoline-, Ellipticine-,<br>Epibatidine- alkaloids                                  | nucleobase binding sites                                                                                            | TS2               | sites<br>DNA intercalation sites                                                                                                                                                  | TC4                  |
| DC41<br>(26) | 78       | 2 (1/1) | 3 (2/1)      | Smaller indole<br>alkaloids                                                                                         | amine binding sites                                                                                                 | TS1               | amine receptors ligand binding<br>sites                                                                                                                                           | TC1                  |
| DC42<br>(26) | 512      | 7 (5/2) | 10 (6/4)     | Indole-containing<br>amino acid tryptophan<br>analogs,<br>Monoterpenoid indole<br>alkaloids, Yohimbine<br>alkaloids | amine binding sites                                                                                                 | TS1               | amine receptors ligand binding<br>sites                                                                                                                                           | TC1                  |
| DC43<br>(28) | 29       | 5 (5/0) | 10<br>(10/0) | Tropane alkaloids                                                                                                   | amine binding sites                                                                                                 | TS1               | amine receptors ligand binding<br>sites<br>amine transporters substrate<br>binding sites                                                                                          | TC1<br>TC2           |
| DC44<br>(28) | 358      | 5 (5/0) | 21<br>(21/0) | Catecholamines,<br>Small alkaloids with<br>an amine group                                                           | amine binding sites<br>opiate binding sites                                                                         | TS1<br>TS18       | amine receptors ligand binding<br>sites<br>opiate receptor ligand binding<br>sites                                                                                                | TC1<br>TC43          |
| DC45<br>(30) | 447      | 7 (6/3) | 20<br>(13/7) | Tetracyclines,<br>Capsaicinoids,<br>Disulfide<br>bromotyrosine<br>derivatives                                       | aminoacyl-tRNA binding<br>sites                                                                                     | TS6               | ribosome 30s subunit<br>aminoacyl-tRNA binding sites                                                                                                                              | TC18                 |
| DC46<br>(32) | 20       | 3 (3/1) | 7 (5/2)      | Vinca alkaloids                                                                                                     | microtubule sites                                                                                                   | TS17              | microtubule taxoid site                                                                                                                                                           | TC42                 |
| DC47<br>(33) | 173      | 4 (4/0) | 4 (4/0)      | Protoberberine<br>alkaloids,<br>Benzylisoquinoline<br>alkaloids                                                     | nucleoside phosphate<br>binding sites<br>cyclic nucleotide binding<br>site<br>amino acid phosphate<br>binding sites | TS4<br>TS5<br>TS7 | nucleoside phosphate metabolism<br>enzymes substrate binding sites<br>cyclic nucleotide<br>phosphodiesterase substrate<br>binding sites<br>phosphatase substrate binding<br>sites | TC10<br>TC17<br>TC19 |
| DC48<br>(32) | 943      | 4 (4/1) | 5 (4/1)      | Colchicine alkaloids,<br>Phthalideisoquinoline<br>alkaloids                                                         | microtubule sites                                                                                                   | TS17              | microtubule taxoid site                                                                                                                                                           | TC42                 |
| DC49<br>(32) | 457      | 6 (6/1) | 19<br>(18/1) | Opiate alkaloids,<br>Phenanthrene<br>alkaloids                                                                      | amine binding sites<br>opiate binding sites                                                                         | TS1<br>TS18       | amine receptors ligand binding<br>sites<br>opiate receptor ligand binding<br>sites                                                                                                | TC1<br>TC43          |
| DC50<br>(32) | 97       | 5 (4/2) | 15<br>(10/5) | Anthracyclines,<br>Aminocoumarins,<br>Coumarin-related<br>chartarin<br>chromophore analogs                          | nucleobase binding sites<br>nucleoside phosphate<br>binding sites                                                   | TS2<br>TS4        | DNA intercalation sites<br>DNA metabolism enzymes<br>nucleoside phosphate binding<br>sites                                                                                        | TC4<br>TC7           |
| DC51<br>(32) | 27       | 2 (2/1) | 5 (3/2)      | Calicheamicins,<br>Eneidyne                                                                                         |                                                                                                                     |                   |                                                                                                                                                                                   |                      |
| DC52<br>(10) | 663      | 3 (3/0) | 4 (4/0)      | Small phenolic<br>molecules                                                                                         | fatty acid, cannabinoid,<br>eicosanoid, retinoid<br>binding sites                                                   | TS15              | retinoid receptor ligand binding<br>sites<br>eicosanoid metabolism enzyme<br>substrate sites                                                                                      | TC37<br>TC38         |
| DC53<br>(10) | 253<br>1 | 9 (5/4) | 17 (9/8)     | Cannabinoids, Small<br>phenolic molecules<br>with a long tail                                                       | fatty acid, cannabinoid,<br>eicosanoid, retinoid<br>binding sites                                                   | TS15              | fatty acid metabolism enzyme<br>substrate sites<br>retinoid receptor ligand binding<br>sites<br>cannabinoid receptor ligand<br>binding sites                                      | TC36<br>TC37<br>TC39 |

|              |     |         |         |                                            |                                                                   |      |                                                                |      |
|--------------|-----|---------|---------|--------------------------------------------|-------------------------------------------------------------------|------|----------------------------------------------------------------|------|
| DC54<br>(10) | 349 | 2 (2/1) | 6 (3/3) | Chromone derivatives                       | naphthoquinone binding sites                                      | TS20 | naphthoquinone binding protein<br>naphthoquinone binding sites | TC45 |
| DC55<br>(10) | 472 | 3 (3/0) | 5 (5/0) | Anthraquinones &<br>derivatives            | nucleobase binding sites                                          | TS2  | DNA intercalation sites                                        | TC4  |
| DC56<br>(11) | 222 | 2 (1/1) | 3 (2/1) | Cannabinoids,<br>Benzofuran<br>derivatives | fatty acid, cannabinoid,<br>eicosanoid, retinoid<br>binding sites | TS15 | cannabinoid receptor ligand<br>binding sites                   | TC39 |
| DC57<br>(12) | 174 | 2 (2/0) | 3 (3/0) | Flavanone glycosides,<br>Flavonol rutinose |                                                                   |      |                                                                |      |
| DC58<br>(12) | 105 | 2 (2/0) | 5 (5/0) | Furanochromones                            |                                                                   |      |                                                                |      |
| DC59<br>(12) | 500 | 3 (3/2) | 5 (3/2) | Flavanones                                 | fatty acid, cannabinoid,<br>eicosanoid, retinoid<br>binding sites | TS15 | fatty acid metabolism enzyme<br>substrate sites                | TC36 |
| DC60<br>(12) | 32  | 2 (1/1) | 2 (1/1) | Phenylpropanoids &<br>derivatives          | saccharide binding sites                                          | TS12 | monosaccharide receptor binding<br>sites                       | TC32 |

**Supplementary Table S7** List of 20 target site superclasses and their corresponding target site classes with examples. The target site superclasses are labeled as TS1-TS20 and the target site classes are labeled as TC1-TC45.

| Target Site Superclass |                                    | Target Site Class |                                                                      | Example of Targets                                                                                     |
|------------------------|------------------------------------|-------------------|----------------------------------------------------------------------|--------------------------------------------------------------------------------------------------------|
| TS1                    | amine binding sites                | TC1               | amine receptors ligand binding sites                                 | Dopamine receptors, Histamine receptors, 5HT-receptors                                                 |
|                        |                                    | TC2               | amine transporters substrate binding sites                           | Serotonin reuptakes, Dopamine reuptakes, Norepinephrine reuptakes                                      |
| TS2                    | nucleobase binding sites           | TC3               | Pyrimidine metabolism enzymes substrate binding sites                | Thymidylate synthase                                                                                   |
|                        |                                    | TC4               | DNA intercalation sites                                              | DNA                                                                                                    |
| TS3                    | nucleoside binding sites           | TC5               | purine nucleoside receptor ligand binding sites                      | Adenosine receptor                                                                                     |
|                        |                                    | TC6               | purine nucleoside metabolism enzyme substrate binding sites          | Adenosine deaminase                                                                                    |
| TS4                    | nucleoside phosphate binding sites | TC7               | DNA metabolism enzymes nucleoside phosphate binding sites            | DNA topoisomerases, DNA polymerases                                                                    |
|                        |                                    | TC8               | RNA metabolism enzymes nucleoside phosphate binding sites            | t-RNA synthetases                                                                                      |
|                        |                                    | TC9               | nucleoside phosphate receptor ligand binding sites                   | Adenosine diphosphate receptors                                                                        |
|                        |                                    | TC10              | nucleoside phosphate metabolism enzymes substrate binding sites      | Na <sup>+</sup> /K <sup>+</sup> -ATPase, Na <sup>+</sup> -K <sup>+</sup> -atpase transmembrane protein |
|                        |                                    | TC11              | kinase ATP binding sites                                             | Kinases                                                                                                |
|                        |                                    | TC12              | steroid metabolism enzyme nucleoside phosphates binding sites        | 11 $\beta$ -hydroxysteroid dehydrogenase                                                               |
|                        |                                    | TC13              | ATP-gated channel ligand binding sites                               | ATP-sensitive K <sup>+</sup> channel, ATP-sensitive inward rectifier potassium channel                 |
|                        |                                    | TC14              | calcium channel DHP binding site                                     | Ca(2 <sup>+</sup> ) channels, N-type voltage-dependent calcium channels                                |
|                        |                                    | TC15              | chloride channel CBS domain                                          | Glutamate-gated chloride channel                                                                       |
|                        |                                    | TC16              | heat shock protein nucleoside phosphate binding sites                | HSP70                                                                                                  |
| TS5                    | cyclic nucleotide binding sites    | TC17              | cyclic nucleotide phosphodiesterase substrate binding sites          | cGMP-specific 3',5'-cyclic phosphodiesterase                                                           |
| TS6                    | aminoacyl-tRNA binding sites       | TC18              | ribosome 30s subunit aminoacyl-tRNA binding sites                    | 30s ribosomal subunit                                                                                  |
| TS7                    | amino acid phosphate binding sites | TC19              | phosphatase substrate binding sites                                  | Calcineurin, protein tyrosine phosphatase 1B                                                           |
| TS8                    | amino acid binding sites           | TC20              | amino acid receptors ligand binding sites                            | Glutamine receptors, NMDA receptor                                                                     |
|                        |                                    | TC21              | amino acid metabolism enzymes substrates binding sites               | GABA-transaminase                                                                                      |
| TS9                    | oligopeptide binding sites         | TC22              | Neuropeptide receptor ligand binding sites                           | Gonadotropin-releasing hormone receptor, Somatostatin receptor                                         |
|                        |                                    | TC23              | exopeptidase substrate binding sites                                 | Aminopeptidase, dipeptidyl peptidase-4, Angiotensin-converting enzyme                                  |
|                        |                                    | TC24              | oligopeptide histone tail metabolism enzymes substrate binding sites | HDAC                                                                                                   |



|      |                                                             |      |                                                                |                                                                              |
|------|-------------------------------------------------------------|------|----------------------------------------------------------------|------------------------------------------------------------------------------|
|      |                                                             | TC25 | ribosome 23S rRNA peptidyl transferase sites                   | 23s rRNA                                                                     |
|      |                                                             | TC26 | vasoactive peptide receptor binding sites                      | Bradykinin b2 receptor                                                       |
|      |                                                             | TC27 | proteasome substrate binding sites                             | 20s proteasome                                                               |
|      |                                                             | TC28 | serine endopeptidase substrate binding sites                   | HIV-1 protease, Factor Xa                                                    |
| TS10 | peptidoglycan binding sites                                 | TC29 | $\beta$ -lactam binding protein peptidoglycan binding sites    | Penicillin binding proteins                                                  |
| TS11 | Sites within peptidoglycans                                 | TC30 | cell wall peptidoglycan sites                                  | Bacterial outer membrane                                                     |
|      |                                                             | TC31 | monosaccharide metabolism enzyme binding sites                 | Ceramide glucosyltransferase                                                 |
|      |                                                             | TC32 | monosaccharide receptor binding sites                          | sweet taste receptor                                                         |
| TS12 | saccharide binding sites                                    | TC33 | polysaccharide metabolism enzyme substrates binding sites      | 1,3- $\beta$ -D-glucan synthase                                              |
| TS13 | cyclic oligosaccharide drug delivery systems                | TC34 | cyclodextrin drug delivery systems                             | cyclodextrin drug delivery systems                                           |
| TS14 | lipopolysaccharide sites                                    | TC35 | outer membrane lipopolysaccharide sites                        | Bacterial and fungal outer membrane                                          |
|      |                                                             | TC36 | fatty acid metabolism enzyme substrate sites                   | Carnitine o-palmitoyltransferase, Diglyceride acyltransferase, lipoxygenases |
|      |                                                             | TC37 | retinoid receptor ligand binding sites                         | Retinoic acid receptors, Retinoid X receptor,                                |
|      |                                                             | TC38 | eicosanoid metabolism enzyme substrate sites                   | Cox2                                                                         |
| TS15 | fatty acid, cannabinoid, eicosanoid, retinoid binding sites | TC39 | cannabinoid receptor ligand binding sites                      | Cannabinoid receptors                                                        |
| TS16 | coenzyme A & analog binding sites                           | TC40 | coenzyme A & analog metabolism enzymes substrate binding sites | Serine palmitoyltransferase                                                  |
|      |                                                             | TC41 | microtubule laulimalide/peloruside site                        | Microtubule                                                                  |
| TS17 | microtubule sites                                           | TC42 | microtubule taxoid site                                        | Microtubule                                                                  |
| TS18 | opiate binding sites                                        | TC43 | opiate receptor ligand binding sites                           | Opioid receptors                                                             |
| TS19 | steroid binding sites                                       | TC44 | Nuclear receptor ligand binding sites                          | Estrogen receptor, Progesterone receptor                                     |
| TS20 | naphthoquinone binding sites                                | TC45 | naphthoquinone binding protein naphthoquinone binding sites    | Vitamin k epoxide reductase                                                  |

**Supplementary Table S8** List of drugs targeting 27 “new” targets first successfully explored since 1990.

| Target (Year of First Successful Exploration) | Drug (Year of Approval)         |
|-----------------------------------------------|---------------------------------|
| Thrombin (1990)                               | Argatroban (1990)               |
|                                               | Lepirudin (1997)                |
|                                               | Hirulog (2000)                  |
|                                               | Bivalirudin (2000)              |
|                                               | Desirudin (2003)                |
|                                               | Ximelagatran (2004)             |
|                                               | Dabigatran (2010)               |
| Maltase-glucoamylase (1990)                   | Acarbose (1990)                 |
|                                               | Voglibose (1994)                |
|                                               | Miglitol (1998)                 |
| Ornithine decarboxylase (1990)                | Eflornithine hcl (1990)         |
| 4-hydroxyphenylpyruvate dioxygenase (1991)    | Nitisinone (1991)               |
| 5-alpha reductase (1992)                      | Finasteride (1992)              |
|                                               | Azelaic acid (1995)             |
|                                               | Dutasteride (2001)              |
|                                               | Dutasteride (2001)              |
| Angiotensin receptor (1994)                   | Losartan potassium (1994)       |
|                                               | Valsartan (1996)                |
|                                               | Eprosartan (1997)               |
|                                               | Irbesartan (1997)               |
|                                               | Candesartan cilexetil (1997)    |
|                                               | Telmisartan (1999)              |
|                                               | Olmesartan medoxil (2002)       |
| DNA topoisomerase I (1994)                    | Camptothecin (1994)             |
|                                               | Irinotecan hydrochloride (1994) |
|                                               | Topotecan hcl (1996)            |
|                                               | Sphingosomal topotecan (2007)   |
| HIV-1 protease (1995)                         | Saquinavir mesylate (1995)      |
|                                               | Ritonavir (1996)                |
|                                               | Indinavir sulfate (1996)        |
|                                               | Neflavinir mesylate (1997)      |
|                                               | Amprenavir (1999)               |
|                                               | Lopinavir (2000)                |
|                                               | Atazanavir (2003)               |
|                                               | Fosamprenavir (2003)            |
|                                               | Tipranavir (2005)               |
|                                               | Darunavir (2006)                |
| mTOR (1996)                                   | Zotarolimus (1996)              |
|                                               | Sirolimus (1999)                |
|                                               | Temsirolimus (2007)             |

|                                                            |                                |
|------------------------------------------------------------|--------------------------------|
|                                                            | Everolimus (2009)              |
| Histamine N-methyltransferase (1996)                       | Amodiaquine (1996)             |
|                                                            | Latanoprost (1996)             |
|                                                            | Travoprost (2001)              |
| Prostaglandin f2-alpha receptor (1996)                     | Bimatoprost (2001)             |
|                                                            | Oseltamivir phosphate (1999)   |
| Neuraminidase (1999)                                       | Zanamivir (1999)               |
| Myeloid cell surface antigen cd33 (2000)                   | Gemtuzumab ozogamicin (2000)   |
| Ferrochelataze (2001)                                      | methyl aminolevulinate (2001)  |
| Gamma-hydroxybutyrate receptor (2002)                      | Sodium oxybate (2002)          |
| Ceramide glucosyltransferase (2003)                        | Miglustat (2003)               |
|                                                            | Azacytidine (2004)             |
| DNA (cytosine-5)-methyltransferase (2004)                  | Decitabine (2006)              |
| Glutamine receptor (2005)                                  | L-alanyl-l-glutamine (2005)    |
| Methionine Aminopeptidase-2 (2005)                         | Fumagillin (2005)              |
|                                                            | Vorinostat (2006)              |
| Histone deacetylase (2006)                                 | Romidepsin (2009)              |
| Chloride channel protein 2 (2006)                          | Lubiprostone (2006)            |
| Bradykinin B2 receptor (2008)                              | Icatibant (2008)               |
| CYP17A1 (2009)                                             | Abiraterone (2009)             |
| Sphingosine 1-phosphate receptor (2010)                    | Fingolimod (2010)              |
|                                                            | Crofelemer (2012)              |
| Cystic fibrosis transmembrane conductance regulator (2012) | Ivacaftor (2012)               |
| Somatostatin receptor 5 (2012)                             | Pasireotide diaspartate (2012) |
| Smoothened receptor (2012)                                 | Vismodegib (2012)              |

**Supplementary Figure S1** Distribution of the natural product leads of approved and clinical trial drugs in branches 1-4 of the molecular scaffold trees of the 134,097 natural products and 411 natural product leads. The drug-productive scaffolds or scaffold parent-child sub-branches (DSs) are indicated by red dots or red dots connected by red lines, which are marked by the respective label DS1, DS2, etc. The green triangles indicate the natural product leads which are outside the drug-productive scaffolds or scaffold parent-child sub-branches.

Branch1

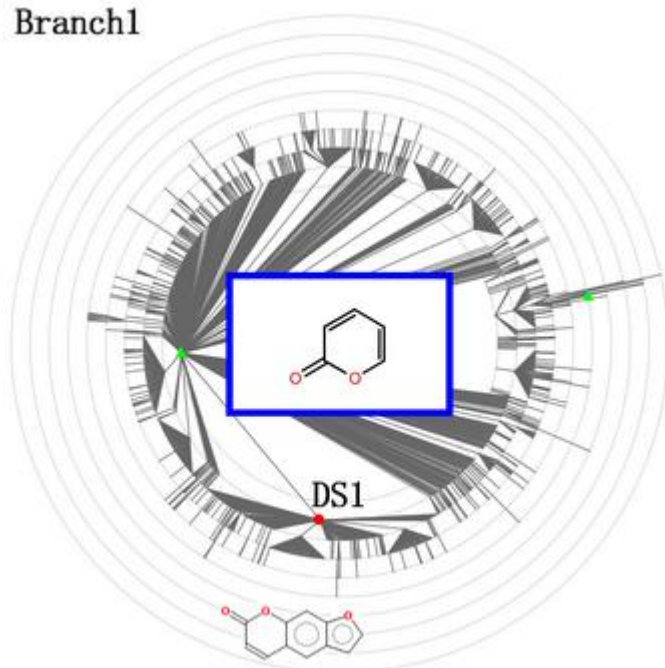

Branch2

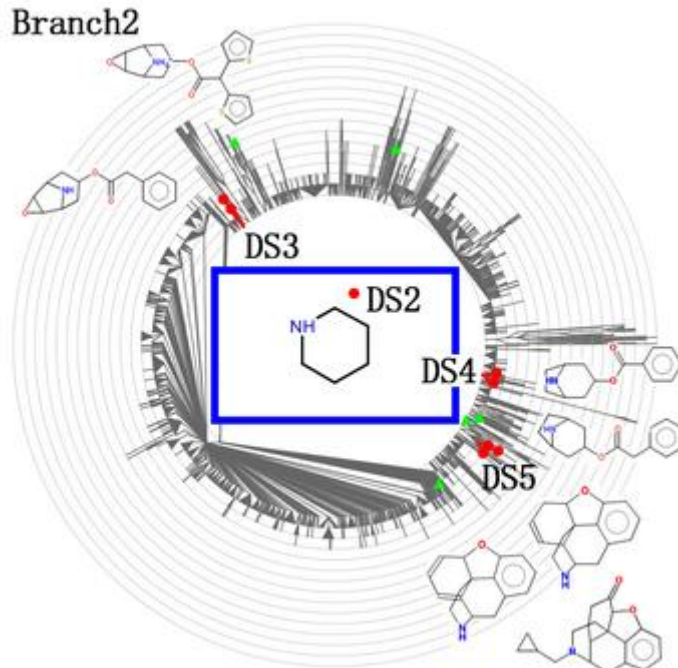

Branch3

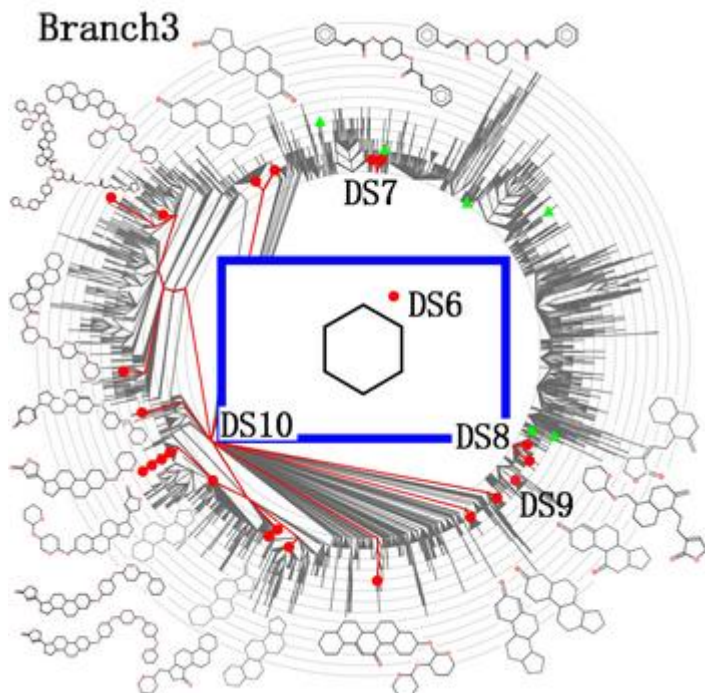

Branch4

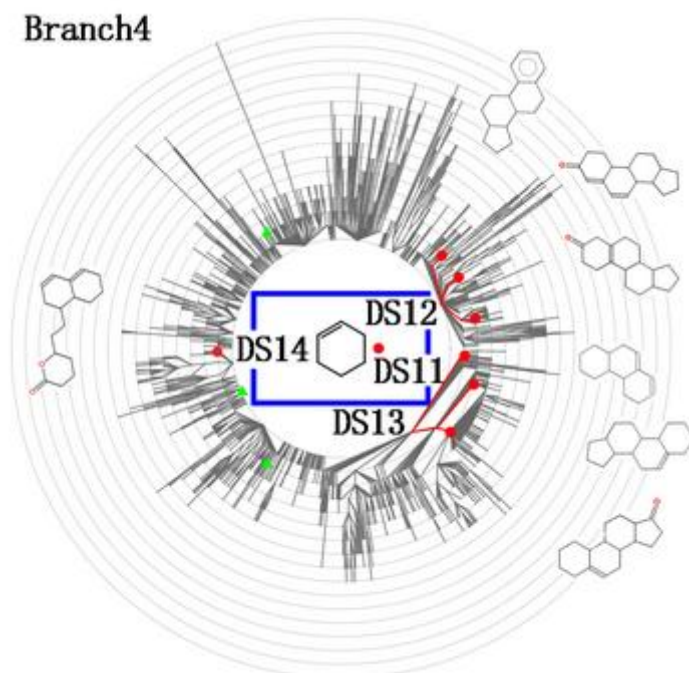

**Supplementary Figure S2** Distribution of the natural product leads of approved and clinical trial drugs in branches 5-8 of the molecular scaffold trees of the 134,097 natural products and 411 natural product leads. The coloring and labeling schemes are the same as Supplementary Figure S1.

**Branch5**

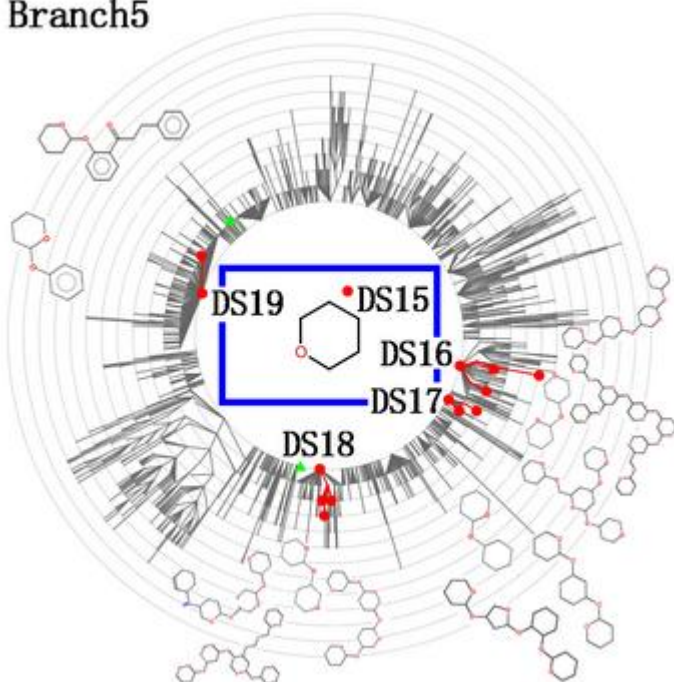

**Branch6**

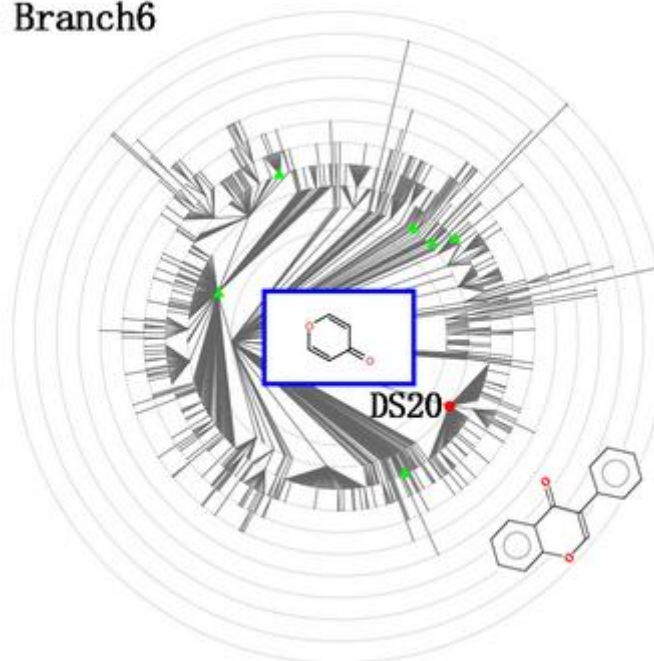

**Branch7**

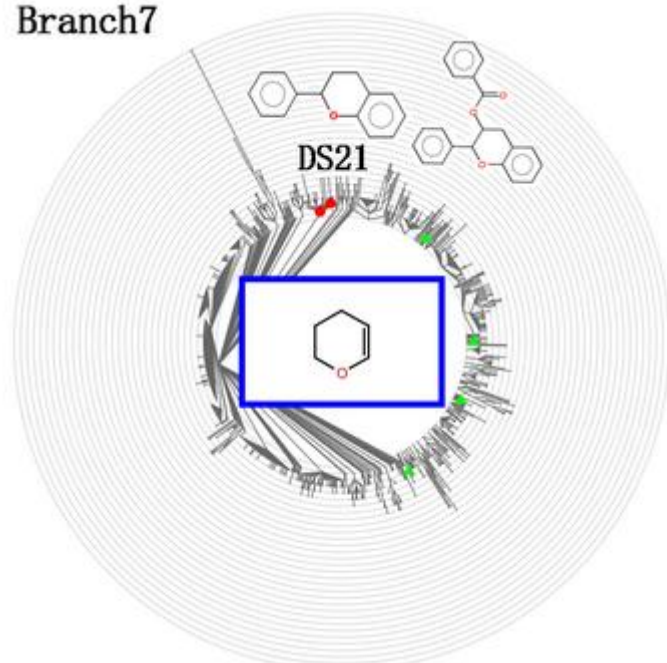

**Branch8**

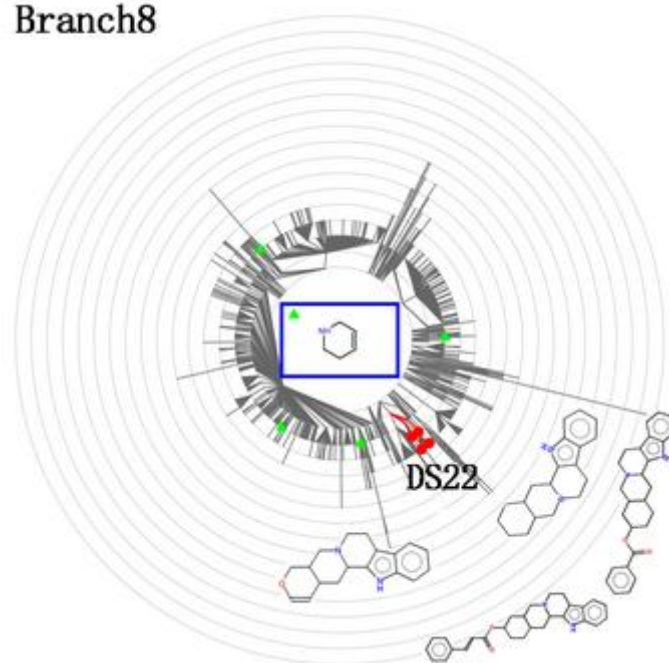

**Supplementary Figure S3** Distribution of the natural product leads of approved and clinical trial drugs in branches 9-12 of the molecular scaffold trees of the 134,097 natural products and 411 natural product leads. The coloring and labeling schemes are the same as Supplementary Figure S1.

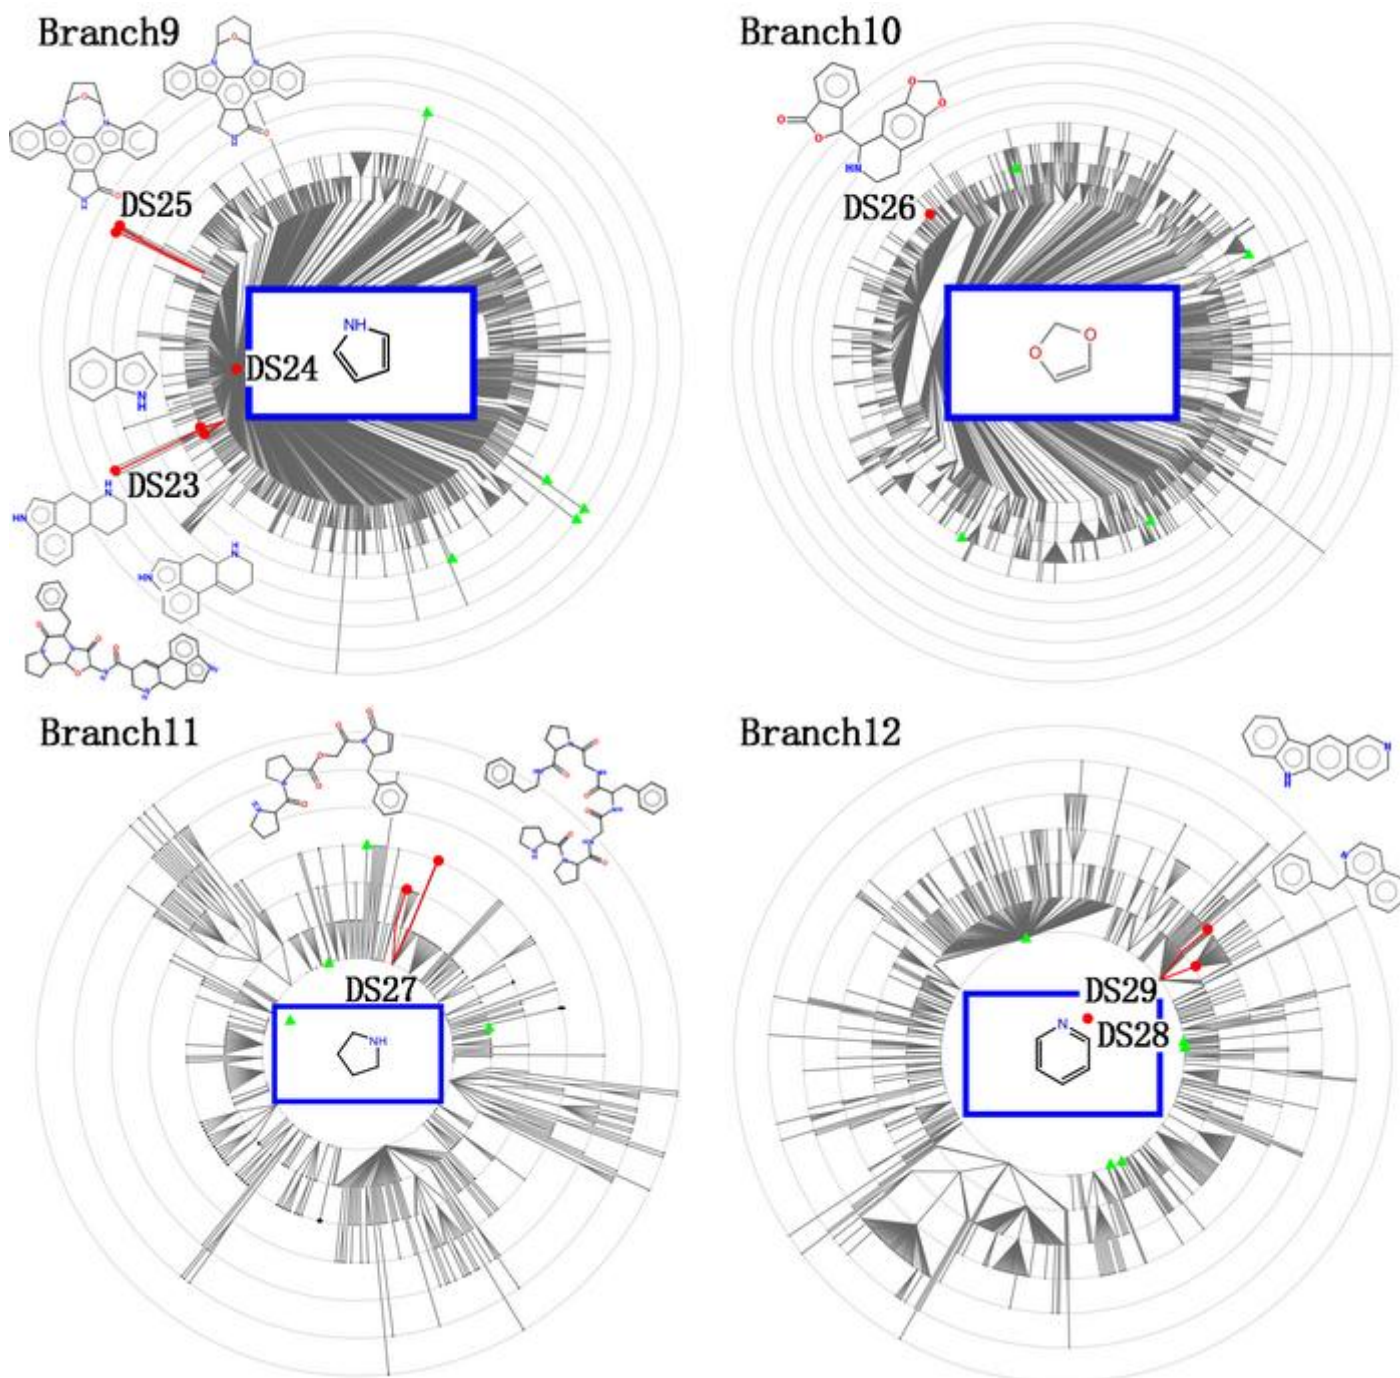

**Supplementary Figure S4** Distribution of the natural product leads of approved and clinical trial drugs in branches 13-16 of the molecular scaffold trees of the 134,097 natural products and 411 natural product leads. The coloring and labeling schemes are the same as Supplementary Figure S1.

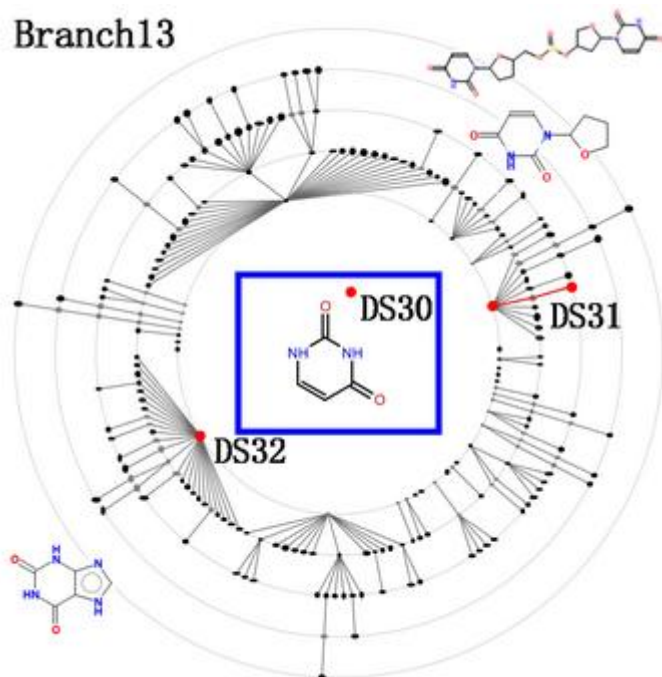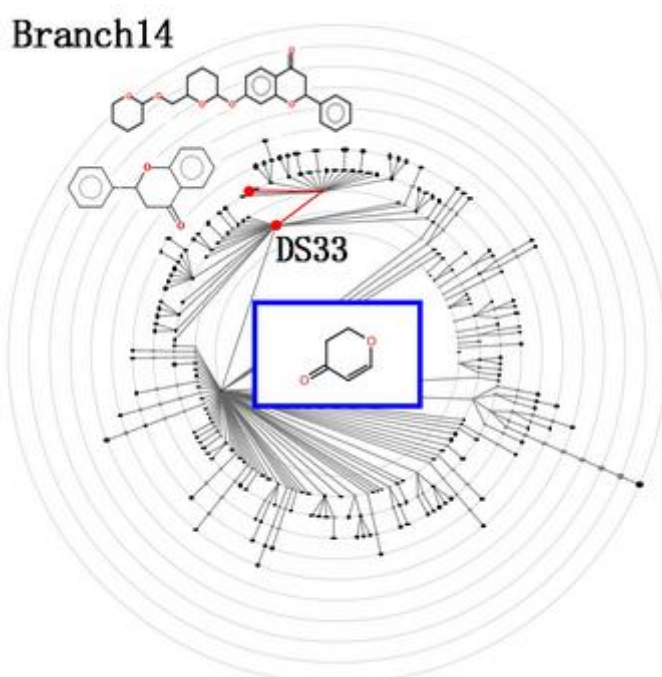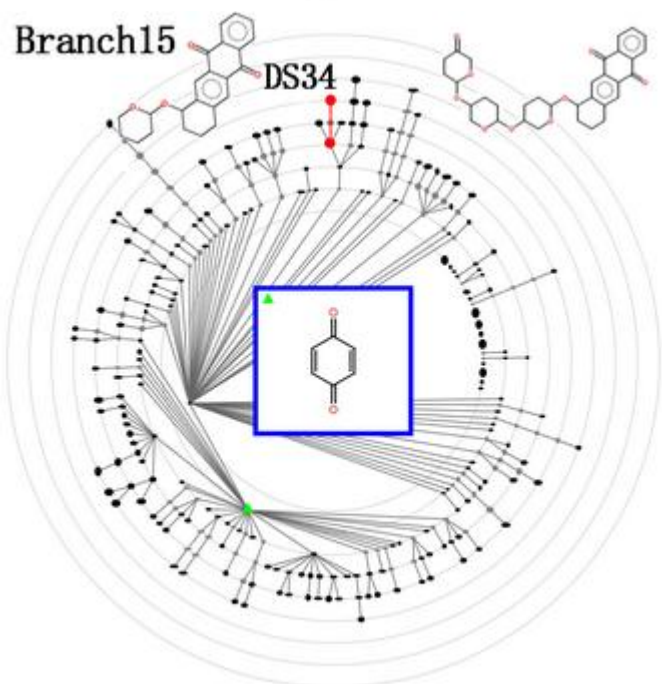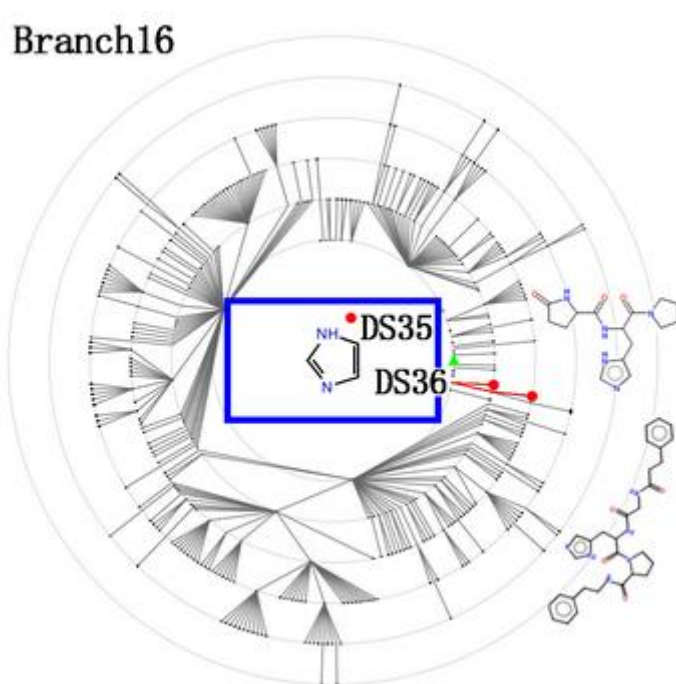

**Supplementary Figure S5** Distribution of the natural product leads of approved and clinical trial drugs in branches 17-20 of the molecular scaffold trees of the 134,097 natural products and 411 natural product leads. The coloring and labeling schemes are the same as Supplementary Figure S1.

**Branch17**

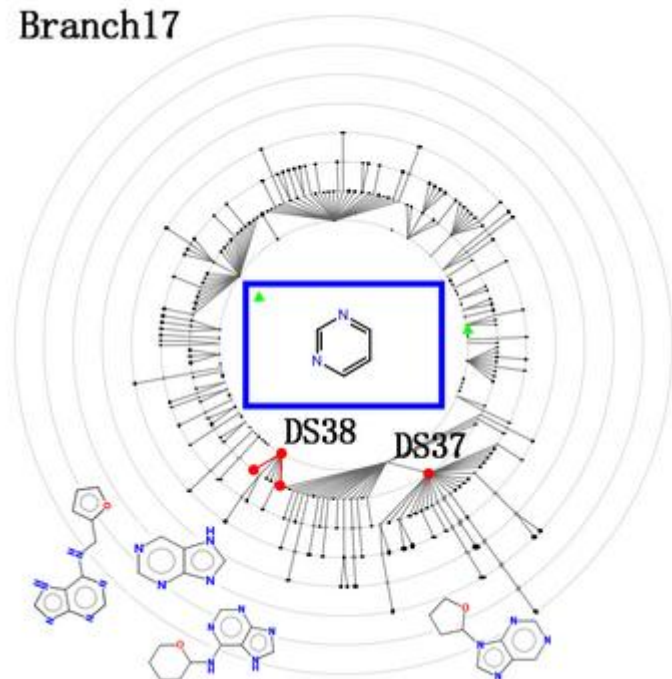

**Branch18**

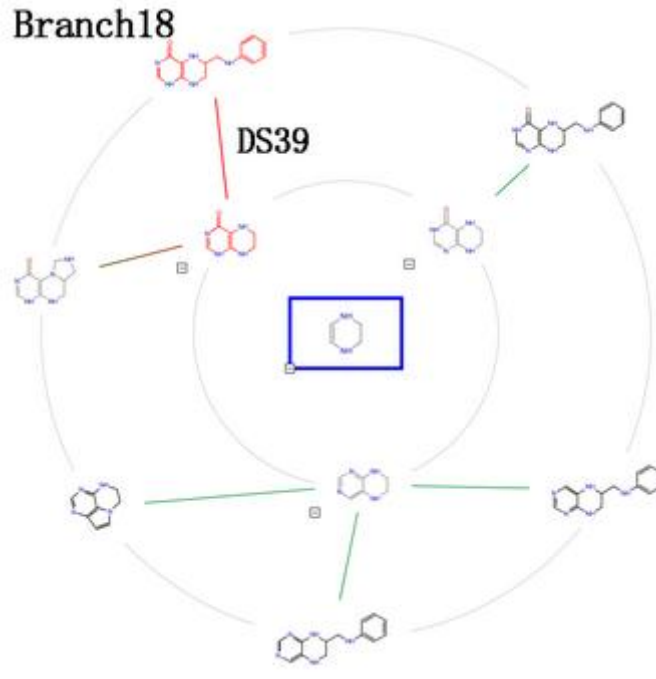

**Branch19**

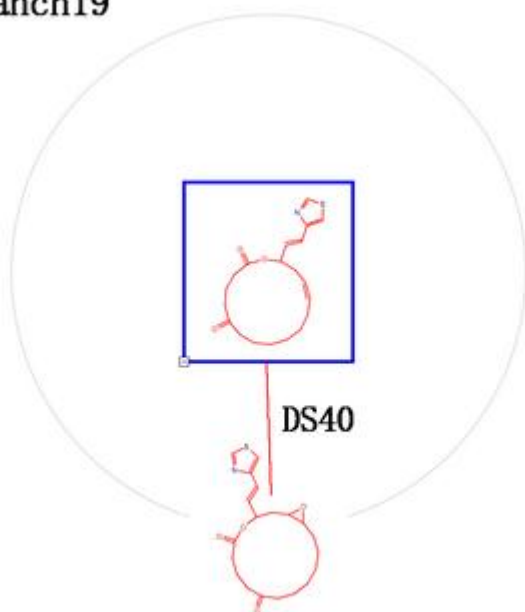

**Branch20**

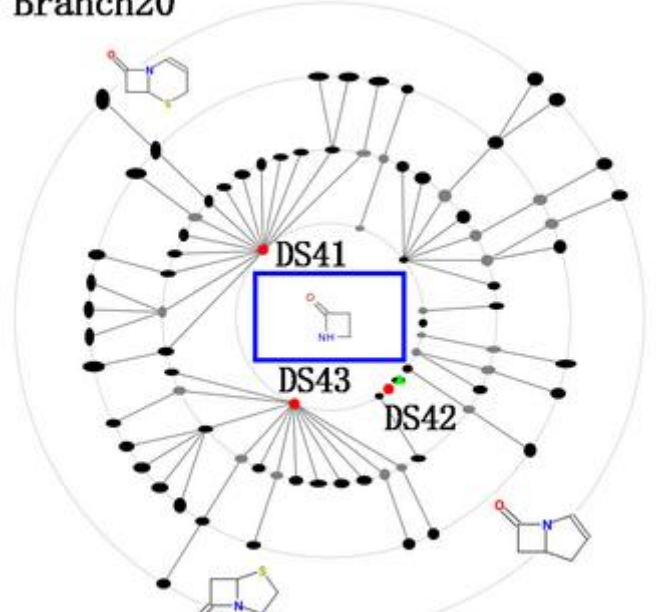



**Supplementary Figure S6** The main branches of the MFTCS clustering tree of the 137,836 natural products and 442 natural product leads. The green digit near each branch-end is the number of natural products in that branch. The two red digits near the fruit beside each branch label box are the numbers of approved (proceed the + sign) and clinical trial leads in that branch. The fruit size roughly correlates with the number of leads. The representative molecular scaffold groups of each branch are given in the box beside each branch.

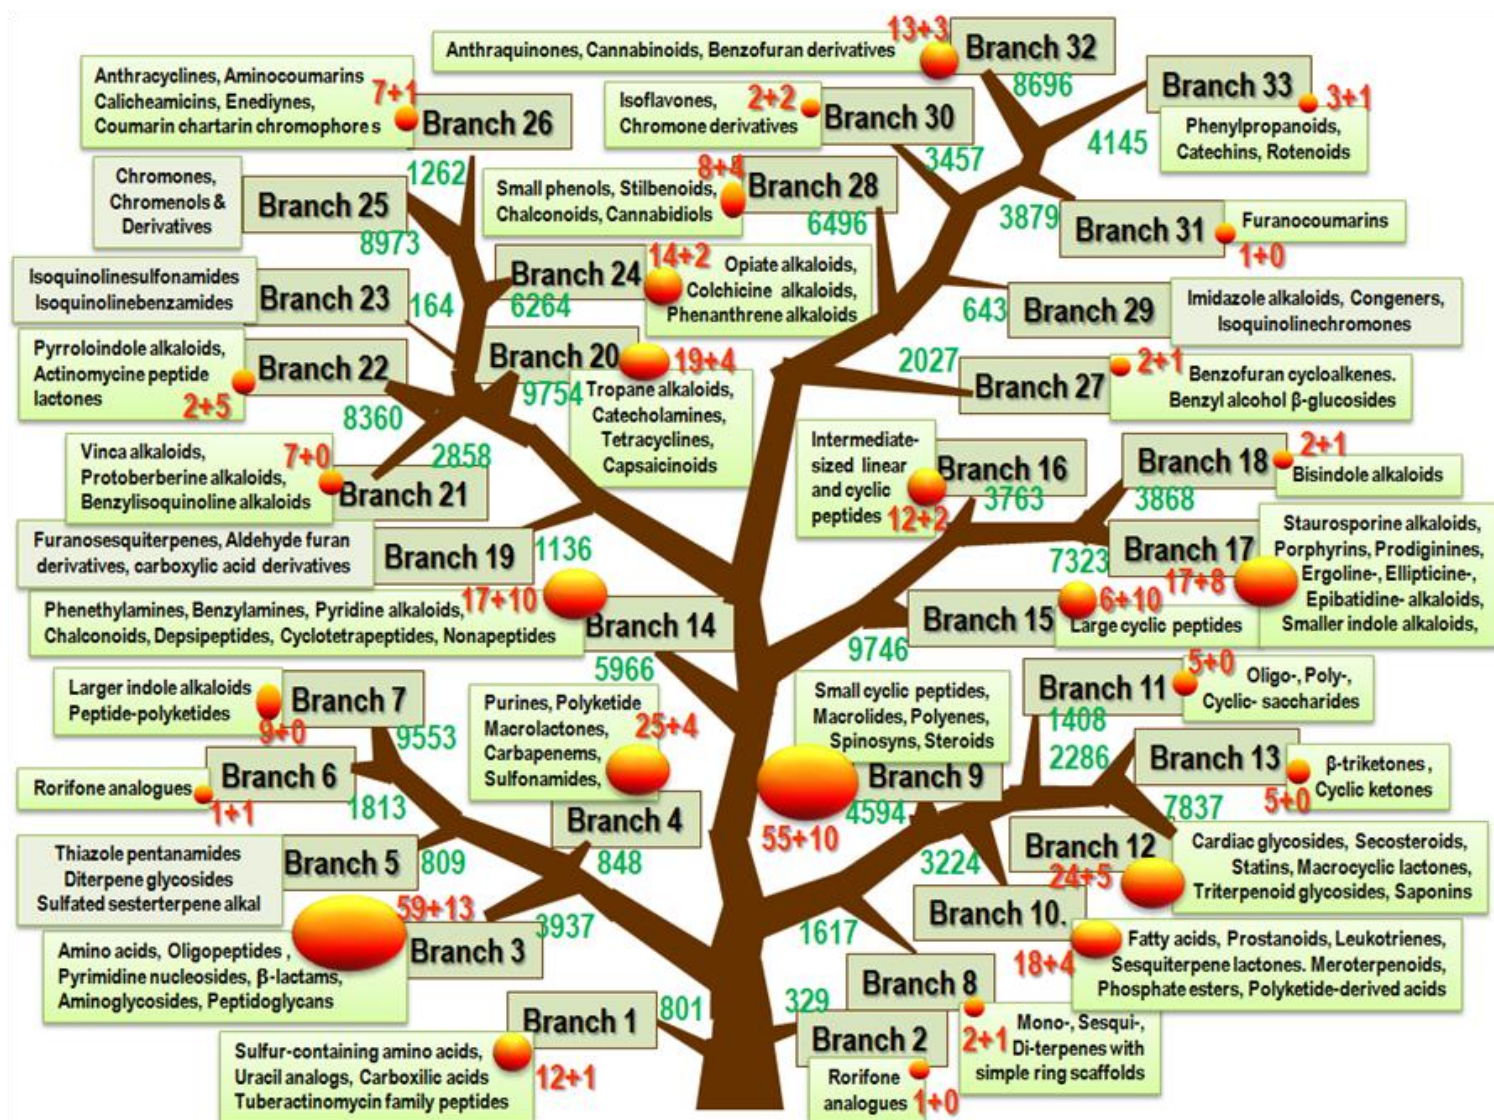

**Supplementary Figure S7** Distribution of the natural product leads of approved and clinical trial drugs in branches 1-8 of the molecular-fingerprint Tanimoto-coefficient similarity clustering tree of the 137,836 natural products and 442 natural product leads. The drug-lead productive clusters are red-orange colored and marked by the respective cluster label. The red, purple and blue lines on top of the clustering tree indicate the locations of the approved, approved + clinical trial, and clinical trial drug-leads with the height correlating with the number of approved + clinical trial drugs.

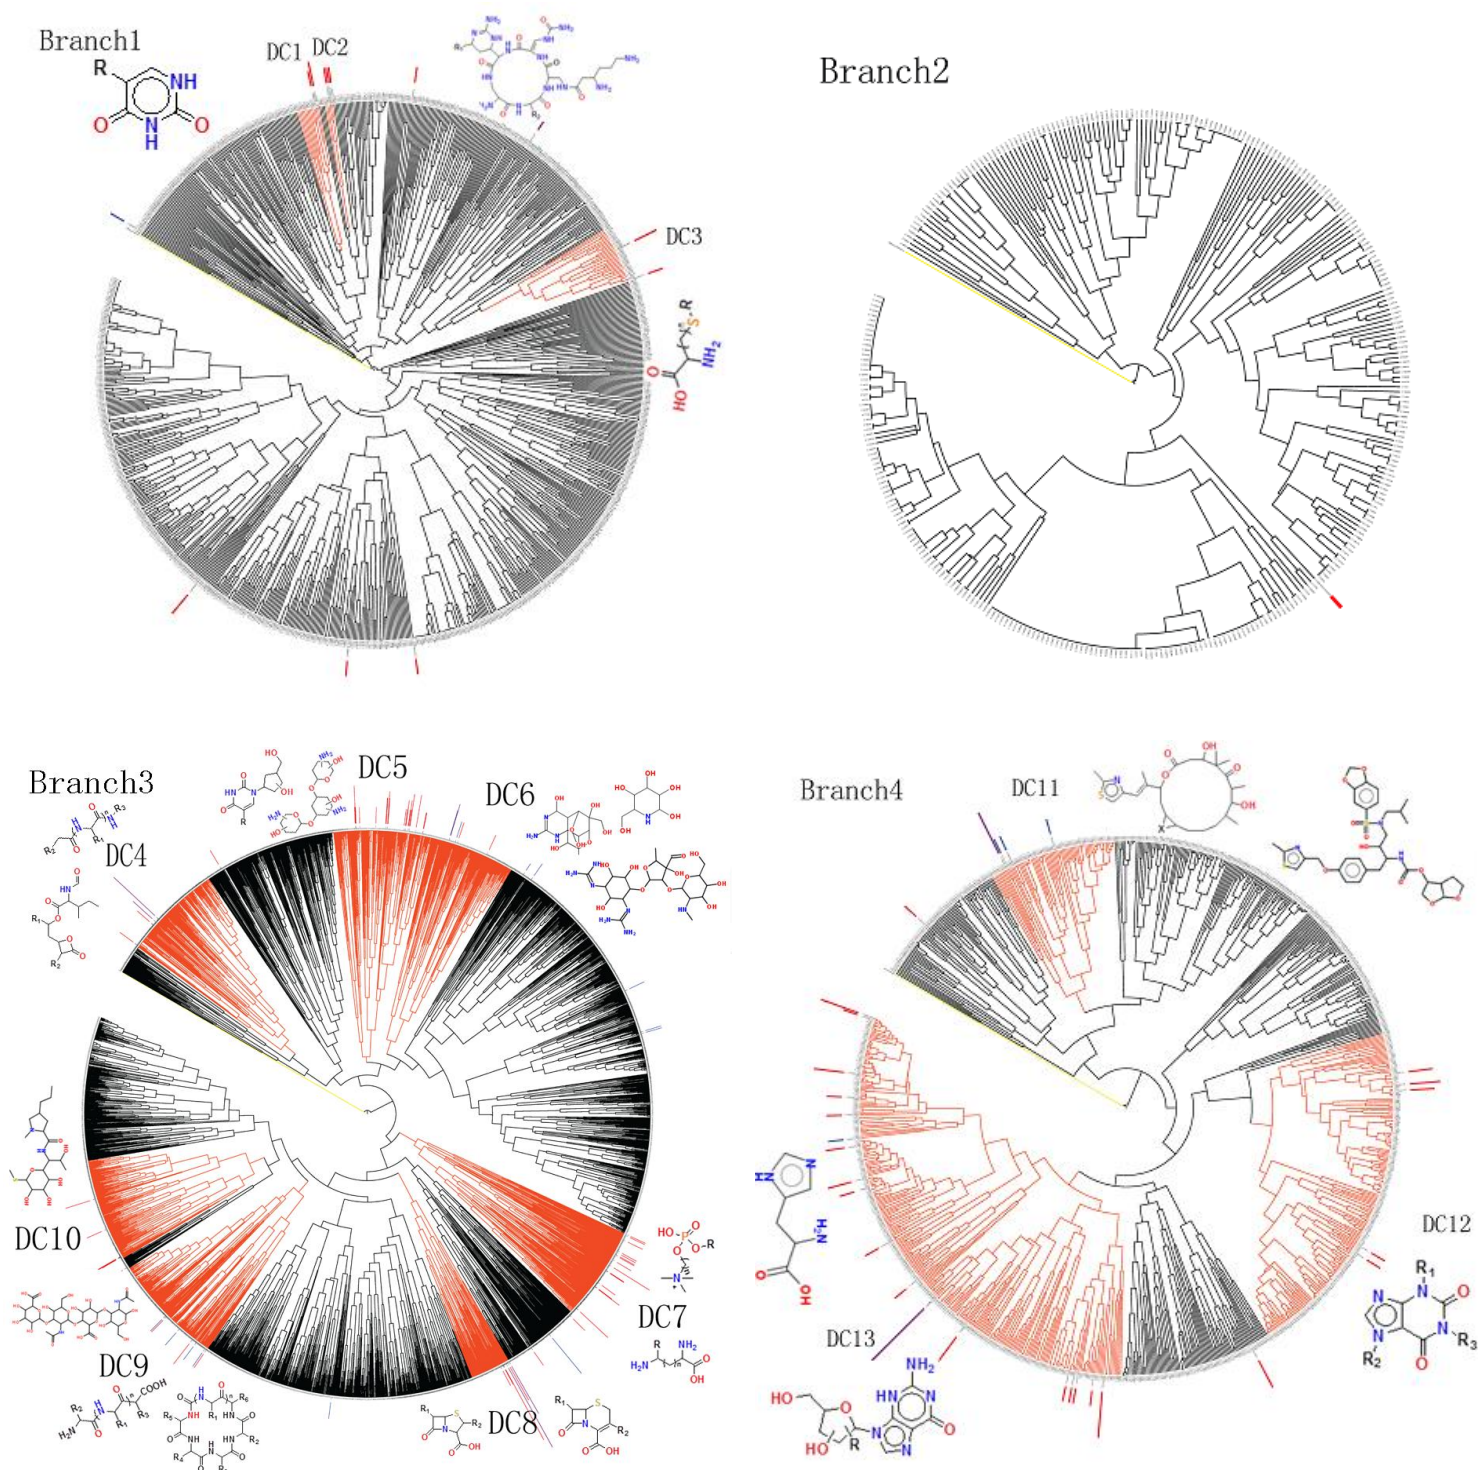

Branch5

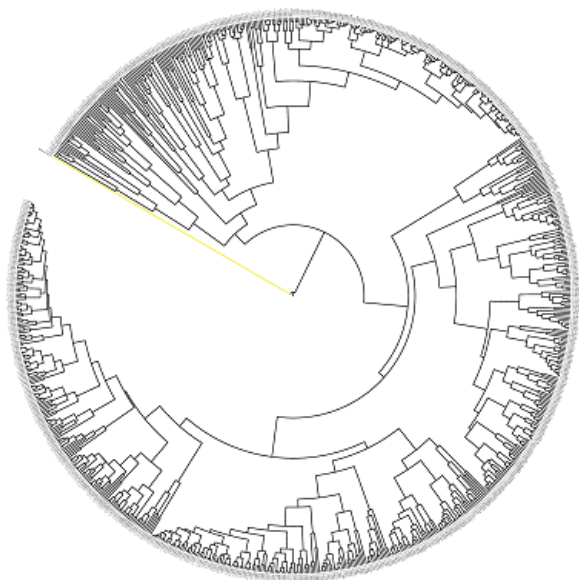

Branch6

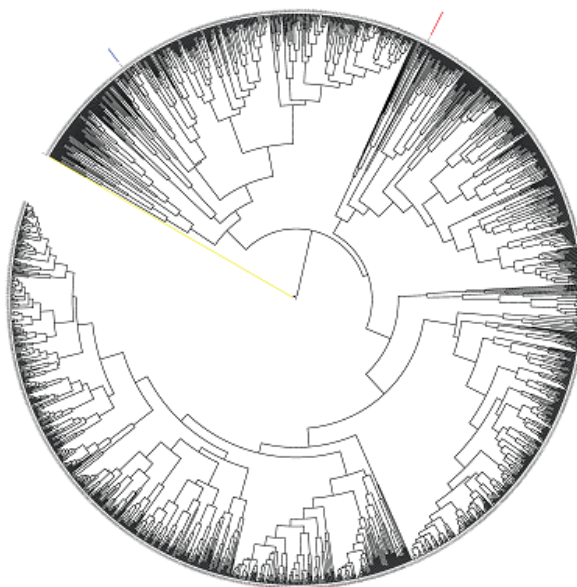

Branch7

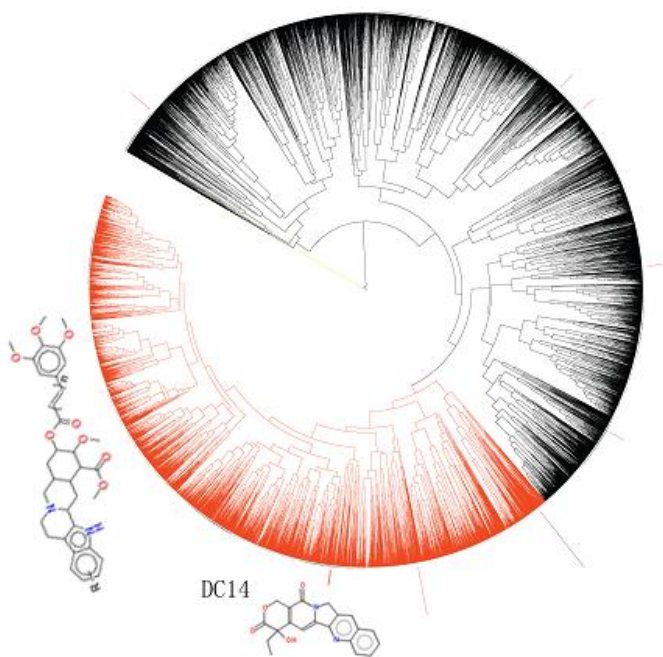

Branch8

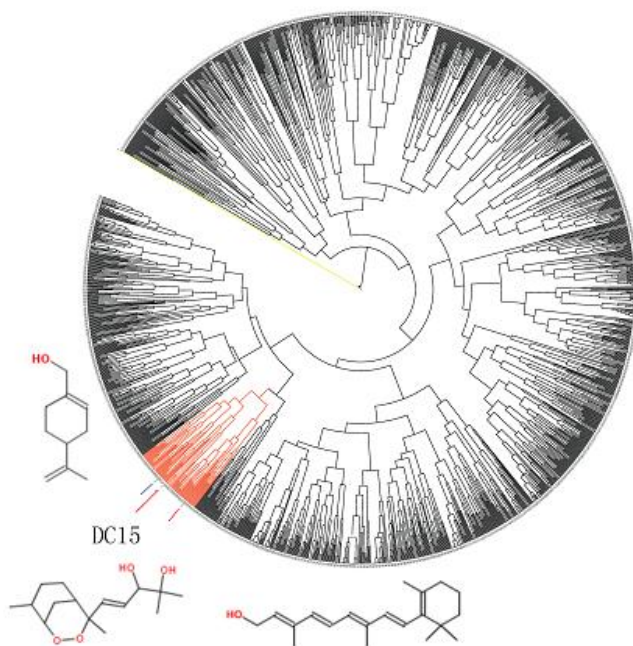

**Supplementary Figure S8** Distribution of the natural product leads of approved and clinical trial drugs in branches 9-16 of the molecular-fingerprint Tanimoto-coefficient similarity clustering tree of the 137,836 natural products and 442 natural product leads. The coloring and labeling schemes are the same as Supplementary Figure S7.

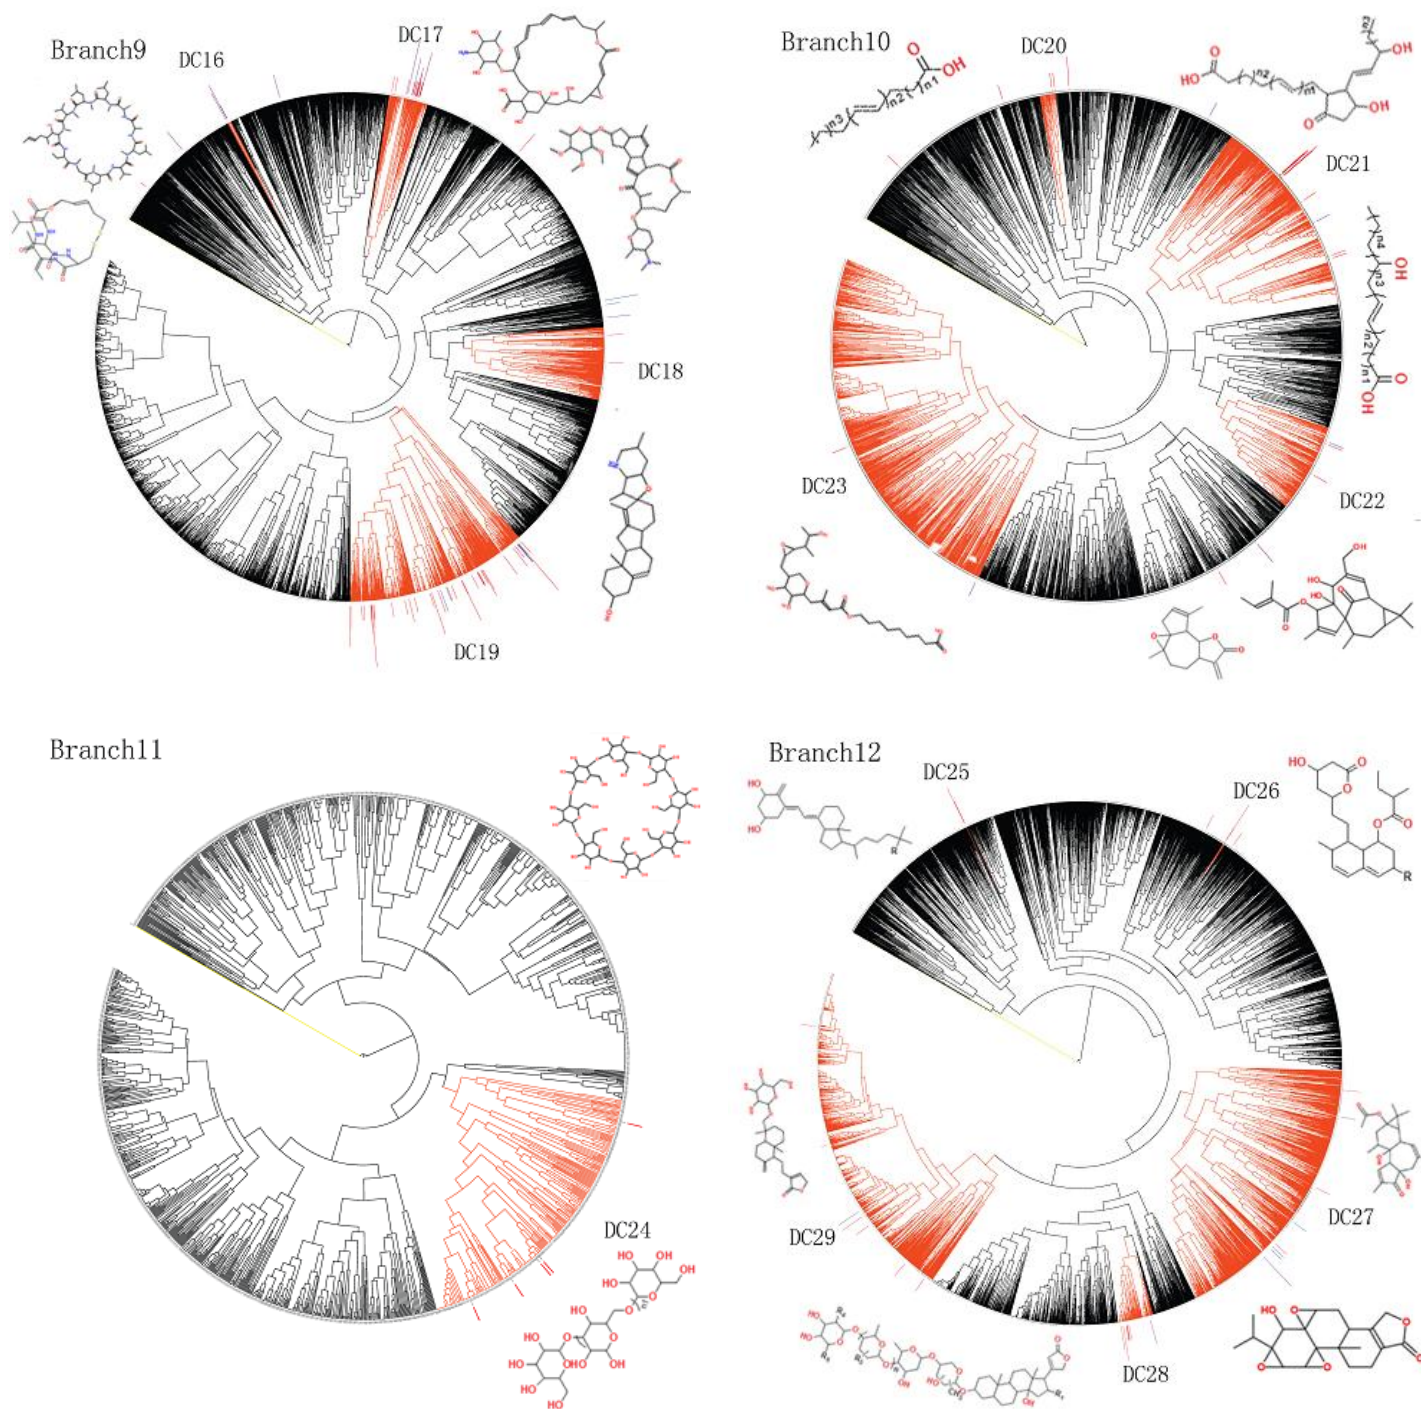

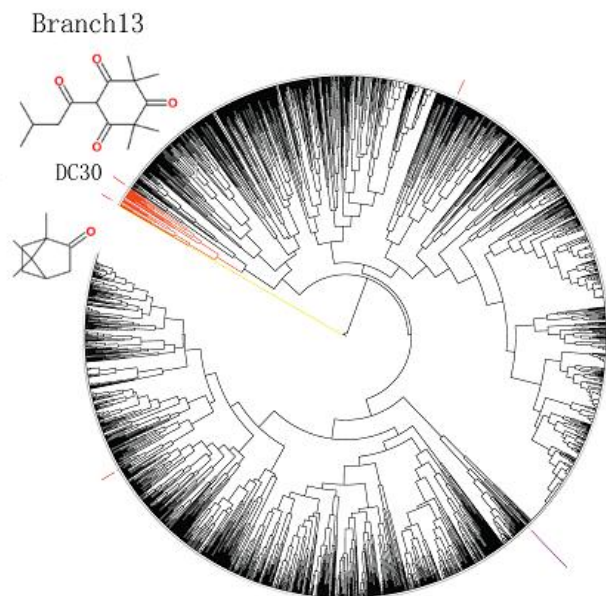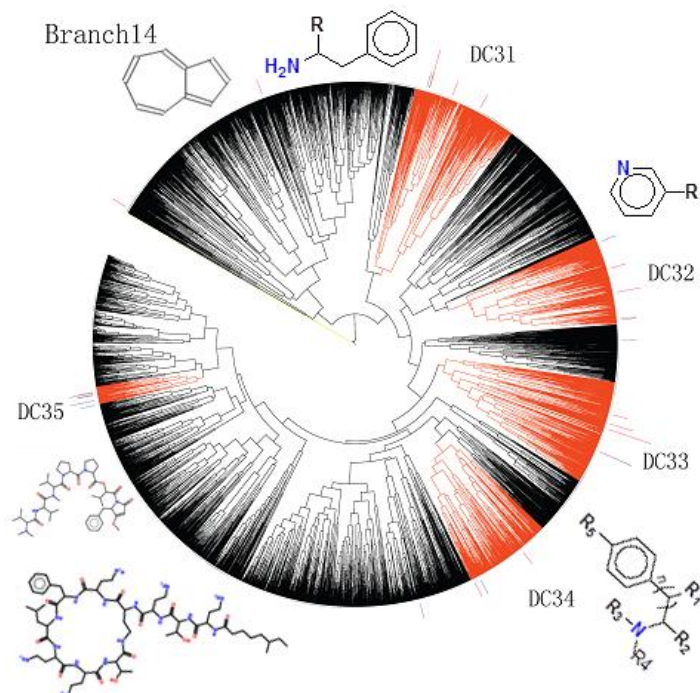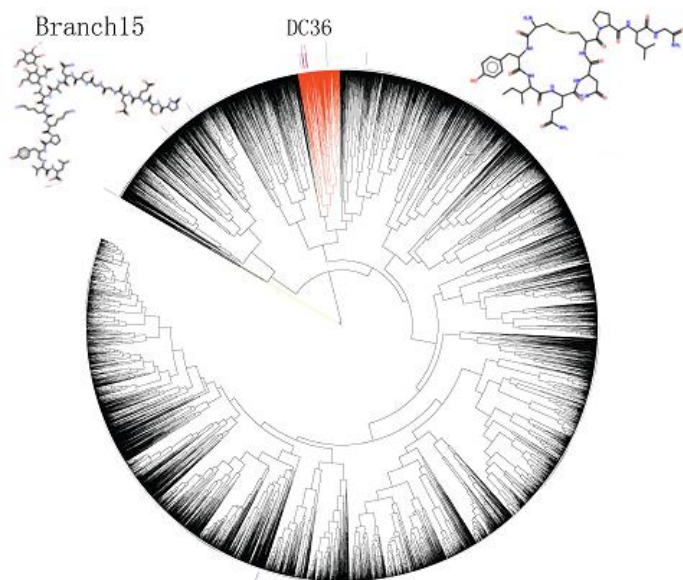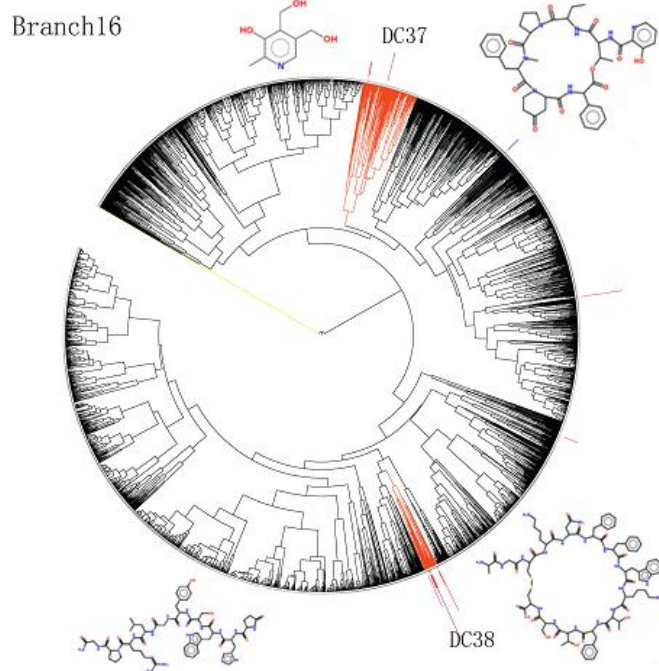

**Supplementary Figure S9** Distribution of the natural product leads of approved and clinical trial drugs in branches 17-24 of the molecular-fingerprint Tanimoto-coefficient similarity clustering tree of the 137,836 natural products and 442 natural product leads. The coloring and labeling schemes are the same as Supplementary Figure S7.

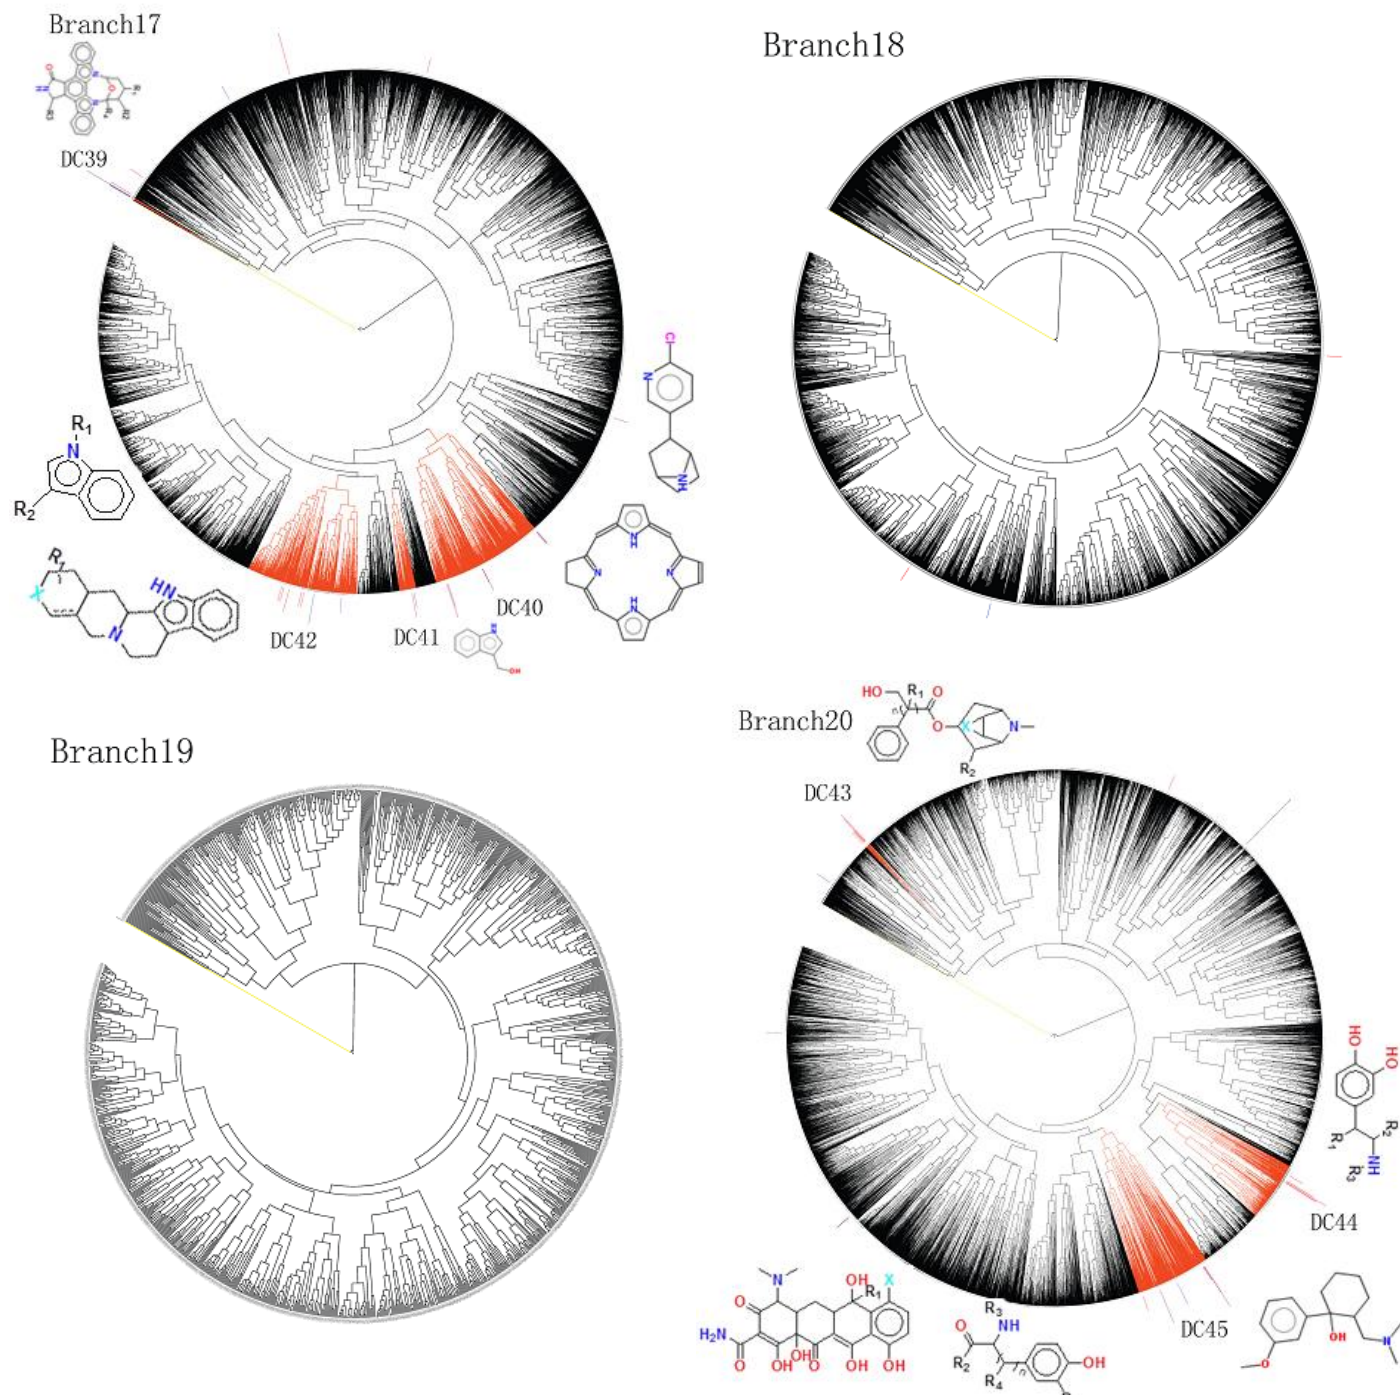

Branch21

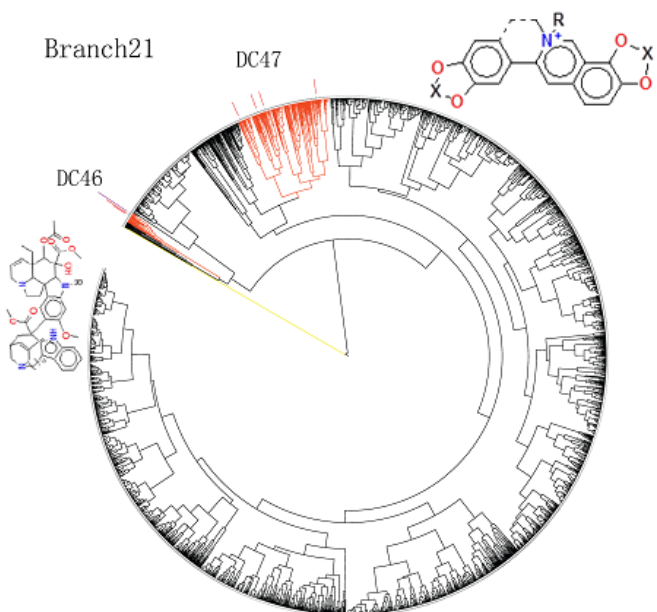

Branch22

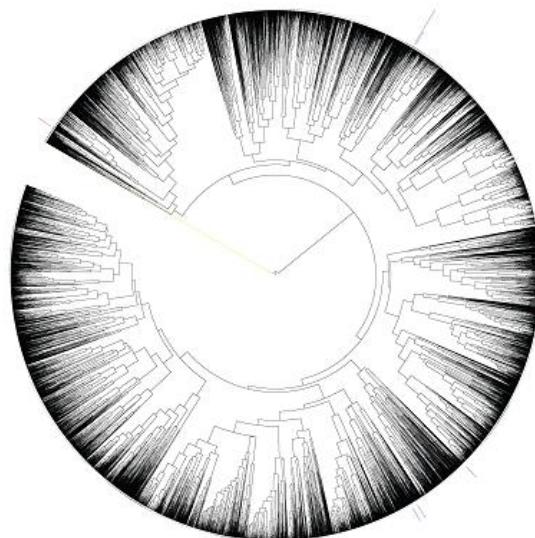

Branch23

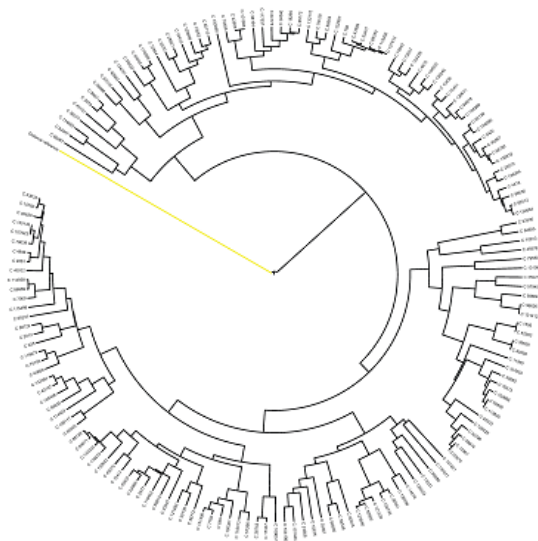

Branch24

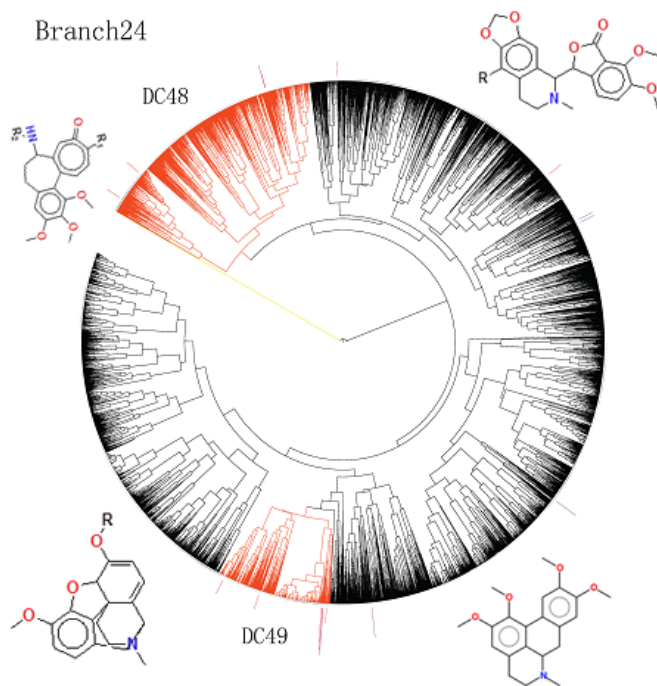

**Supplementary Figure S10** Distribution of the natural product leads of approved and clinical trial drugs in branches 25-33 of the molecular-fingerprint Tanimoto-coefficient similarity clustering tree of the 137,836 natural products and 442 natural product leads. The coloring and labeling schemes are the same as Supplementary Figure S7.

Branch25

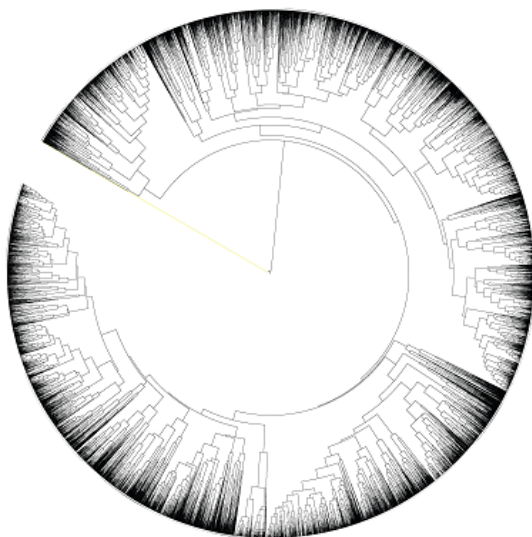

Branch26

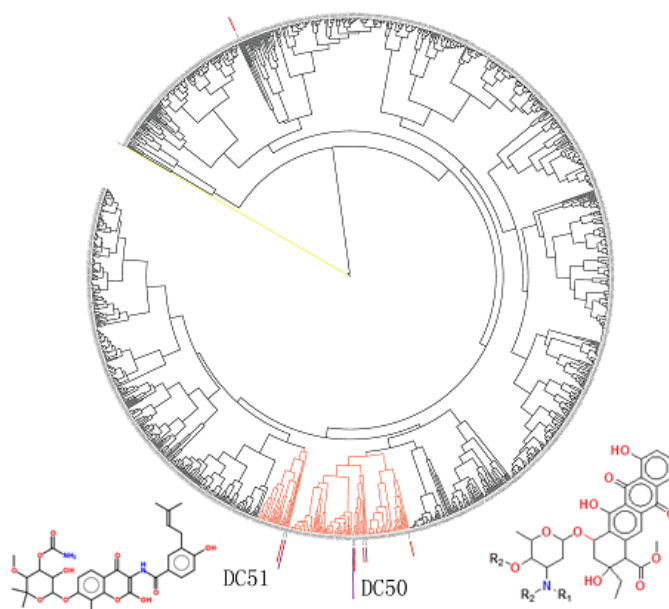

Branch27

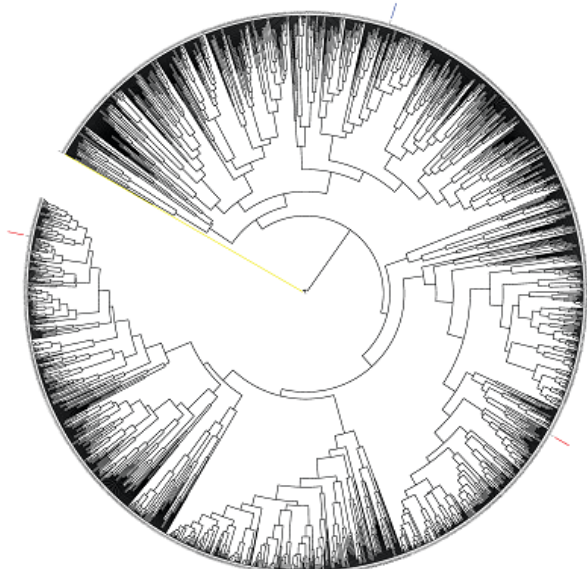

Branch28

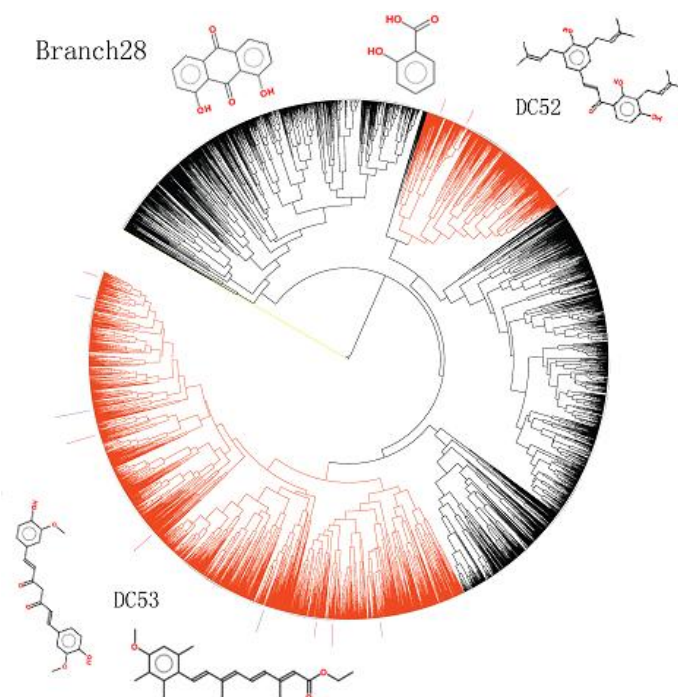



Branch29

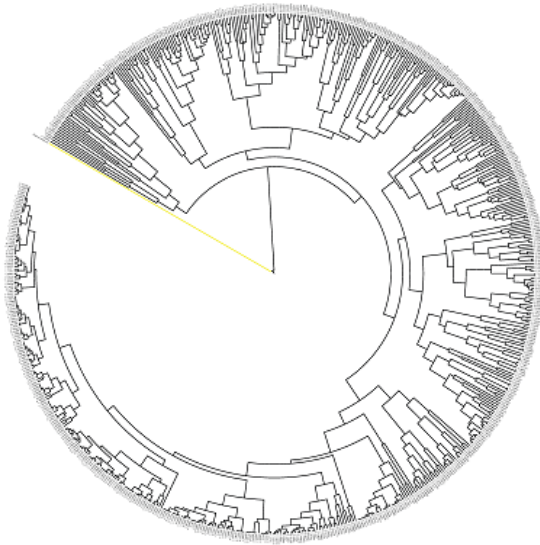

Branch30

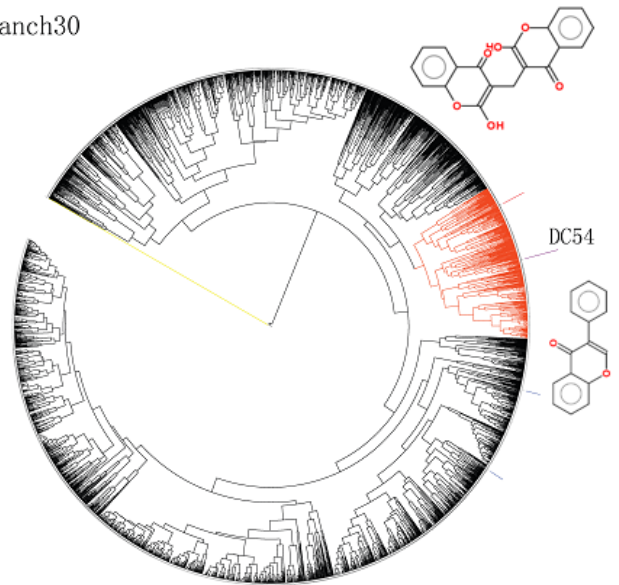

Branch31

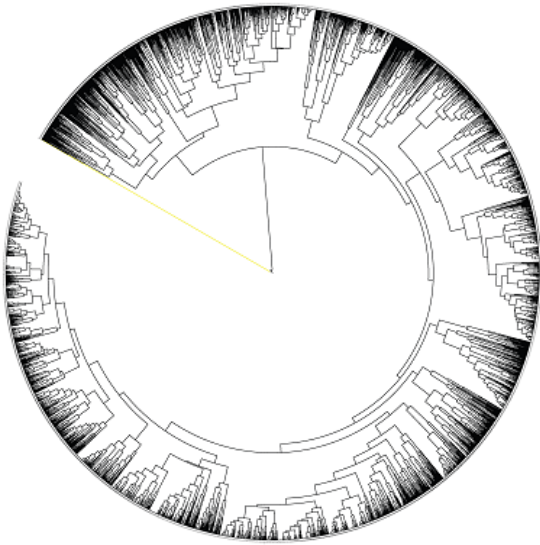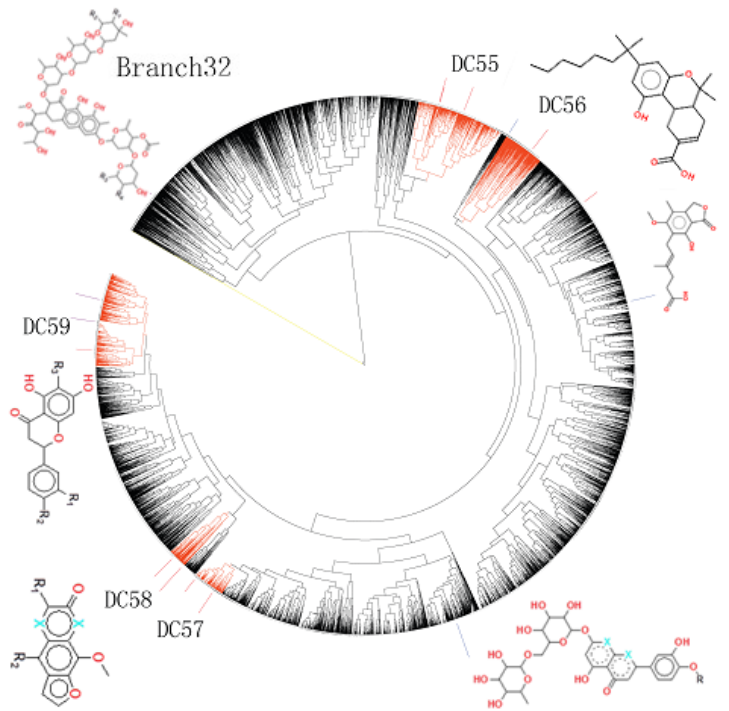

Branch33

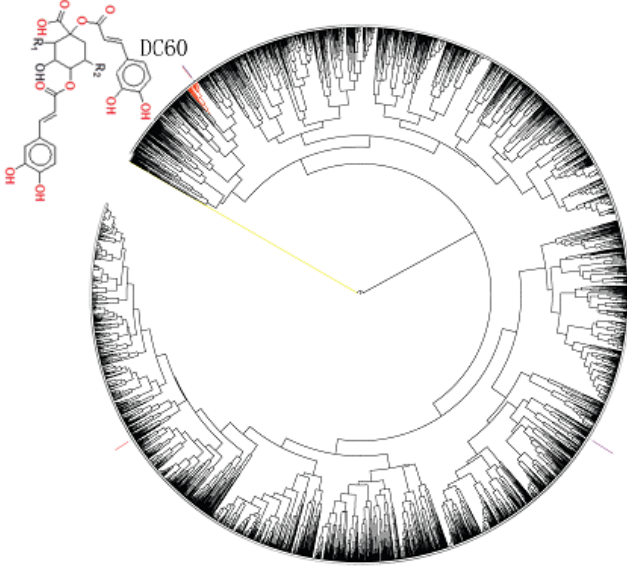

**Supplementary Figure S11** The heat map of the proximity matrix of the 442 NPLDs against the NPs in Branch 4. The row and column positions represents the NPLDs and NPs in the same order as their respective positions in the hierarchical clustering tree of the NPLDs and NPs. The column positions of the DCs DC11 (blue), DC12 (green), and DC13 (brown) in this branch are marked on the left side, and the row positions of the NPLDs in DC11 (red), DC12 (green) and DC13 (brown) are marked on the top side of the heat map.

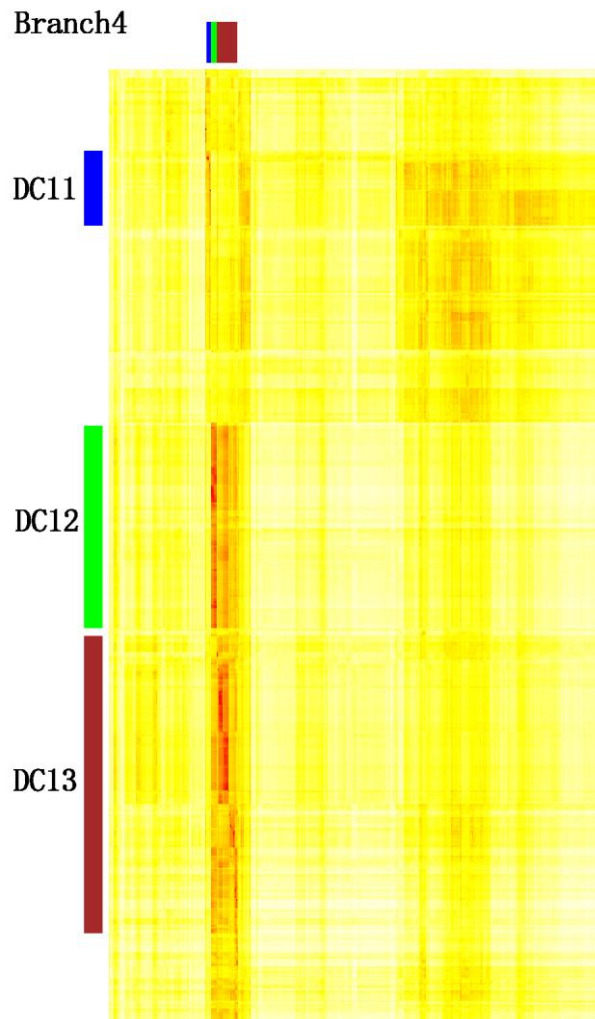

**Supplementary Figure S12** The heat map of the proximity matrix of the 442 NPLDs against the NPs in Branch 9. The row and column positions represents the NPLDs and NPs in the same order as their respective positions in the hierarchical clustering tree of the NPLDs and NPs. The column positions of the DCs DC16 (red), DC17 (brown), DC18 (green) and DC19 (blue) in this branch are marked on the left side, and the row positions of the NPLDs in DC16 (red), DC17 (brown), DC18 (green) and DC19 (blue) are marked on the top side of the heat map.

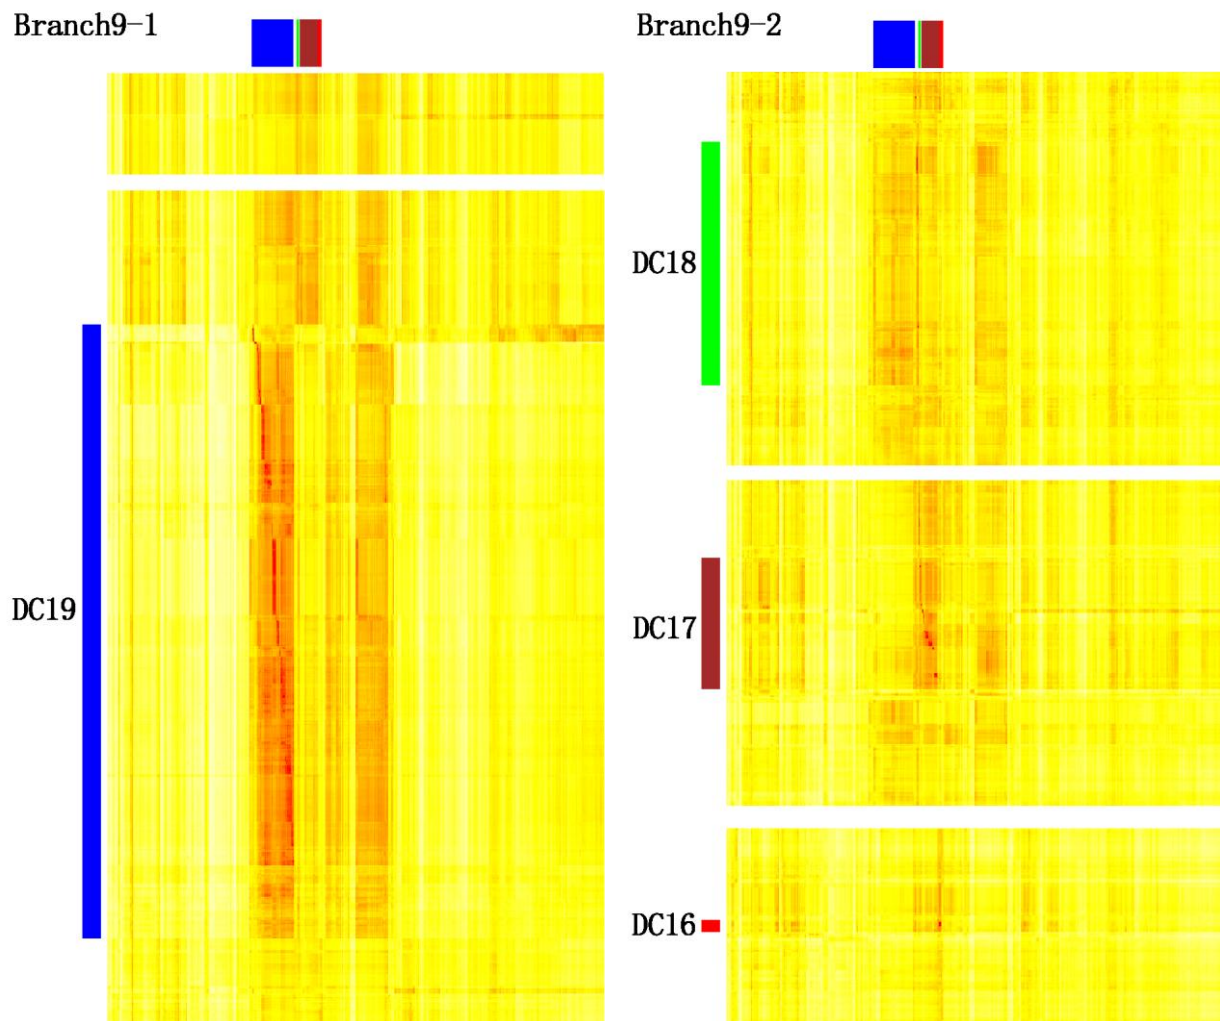

**Supplementary Figure S13** The physicochemical landscape of the NPLDs and NPs in branch 9 characterized by the eight physicochemical properties molecular weight, lipophilicity AlogP and logD, polarizability, and the number of O+N, hydrogen bond donor, hydrogen bond acceptor, rotatable bonds, and rings. The inner black and red lines represent the NPs outside and inside the DCs in this branch. The lengths of the outer green and non-green (red, purple, blue) lines correspond to the values of the specific physicochemical properties of the NPs and the NPLDs (approved, approved + clinical trial, and clinical trial). The DCs in this branch are marked by their DC ID.

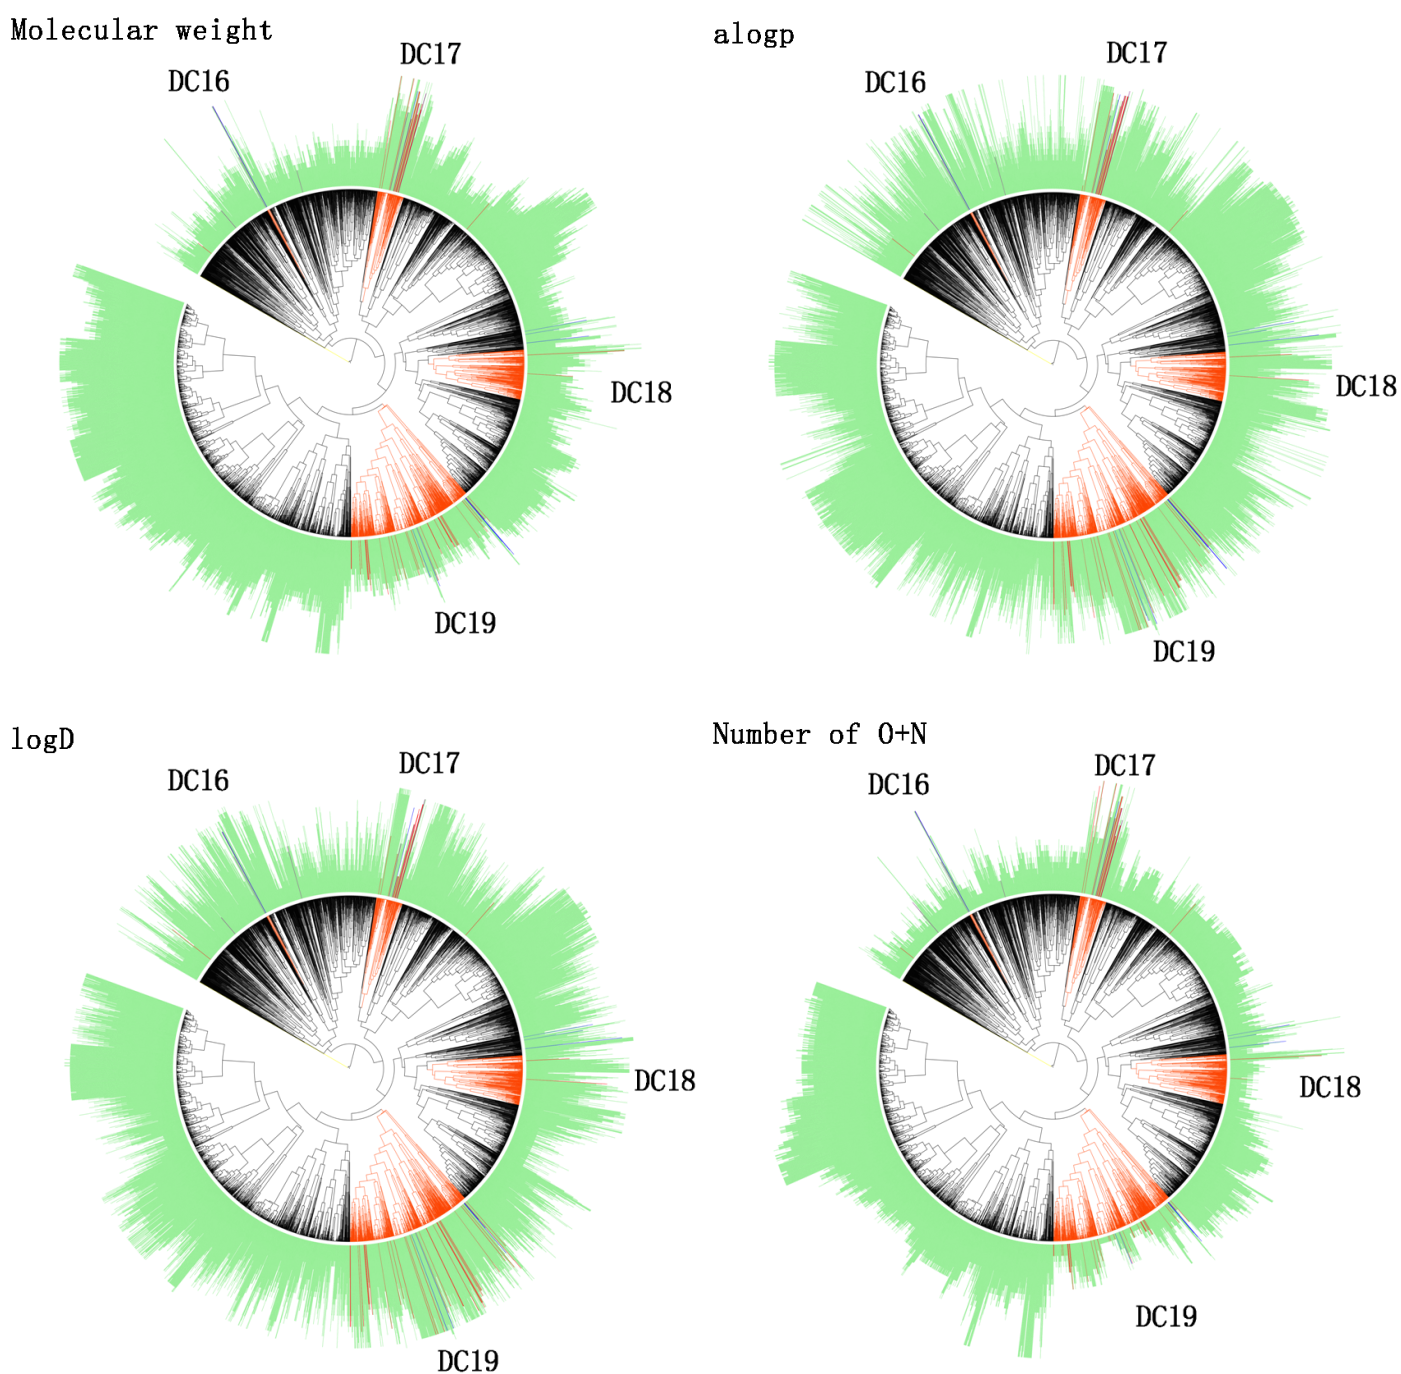

Number of H-bond donor

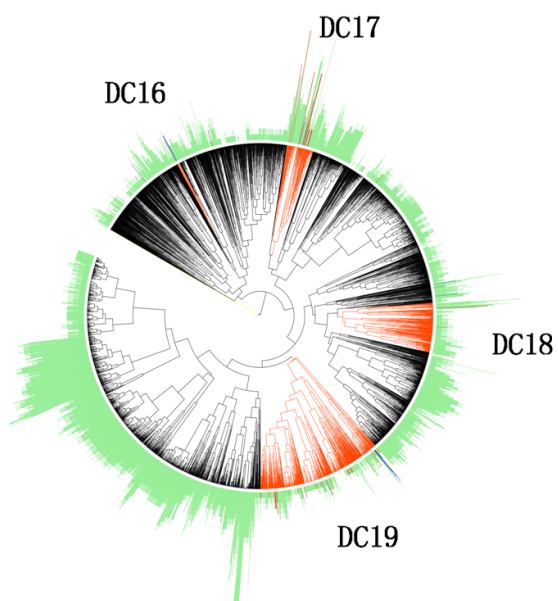

Number of H-bond acceptor

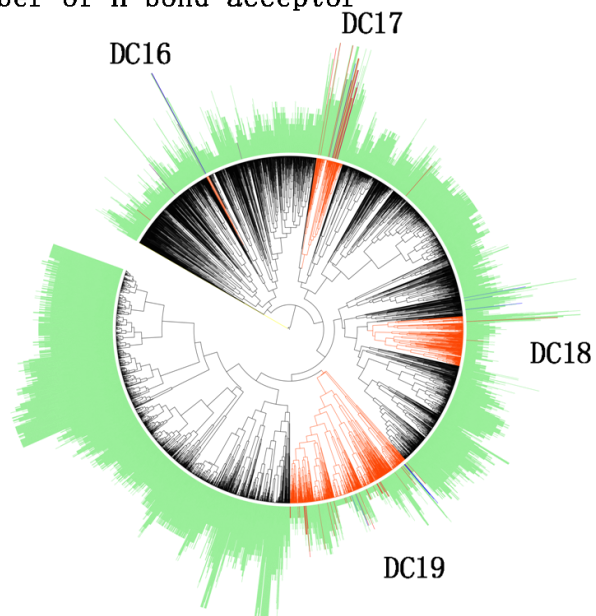

Number of rotatable bonds

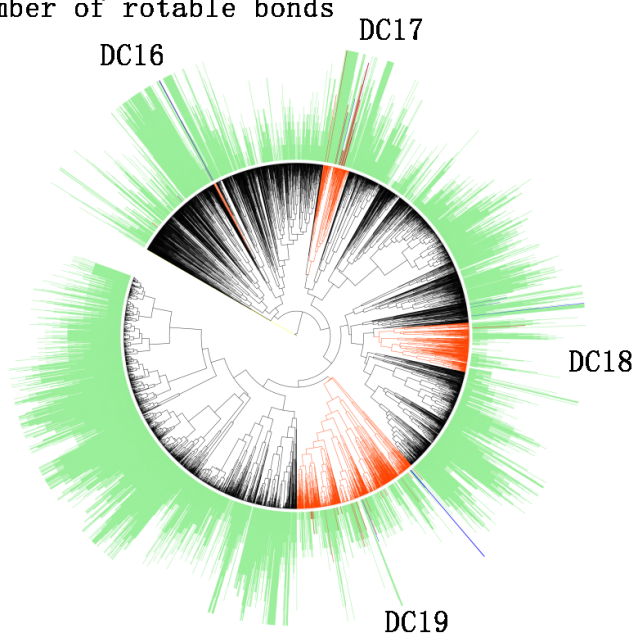

Number of rings

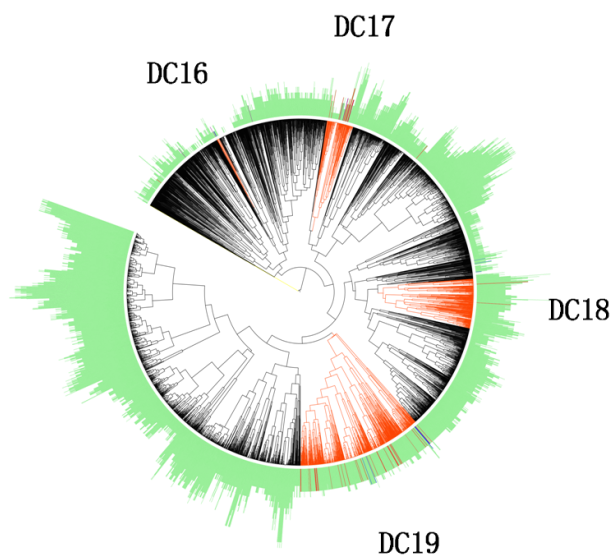

Molecular polarizability

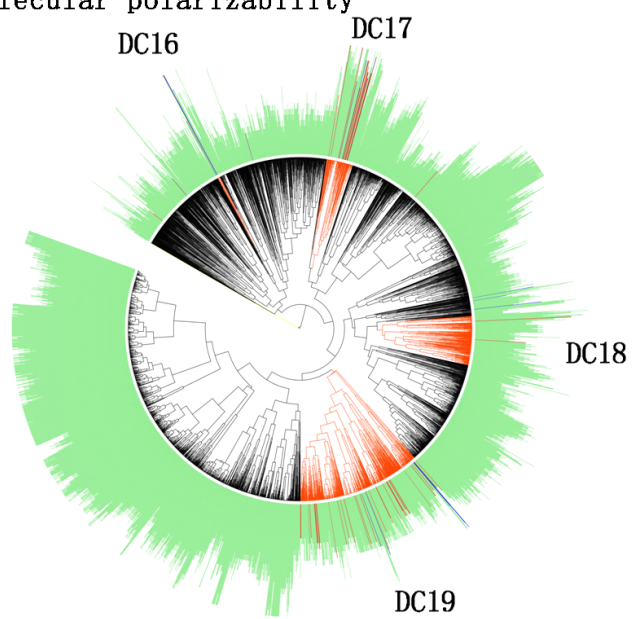

**Supplementary Figure S14** Distribution of the bioactive natural products (green colored lines) with respect to the leads of approved and clinical trial drugs (the red, purple and blue lines on top of the clustering tree) in branches 1-9 of the molecular-fingerprint Tanimoto-coefficient similarity clustering tree of the 137,836 natural products and 442 natural product leads.

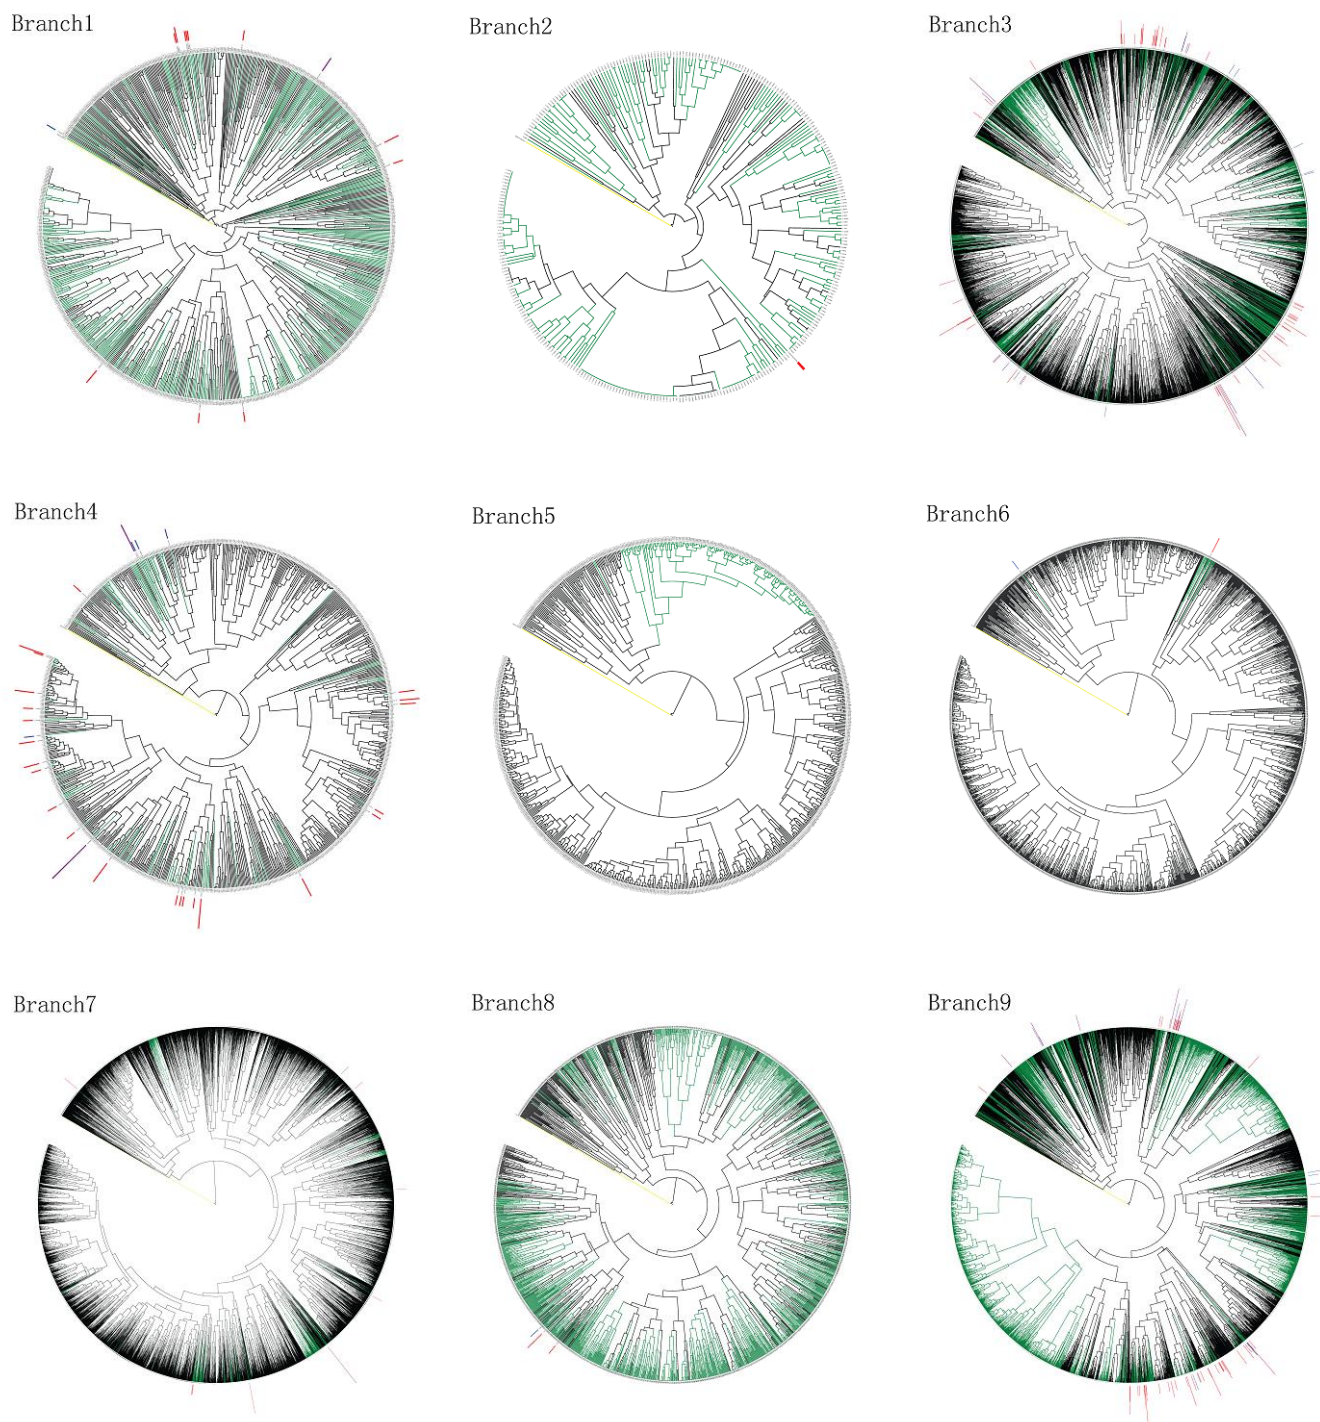



**Supplementary Figure S15** Distribution of the bioactive natural products with respect to the leads of approved and clinical trial drugs in branches 10-18 of the molecular-fingerprint Tanimoto-coefficient similarity clustering tree of the 137,836 natural products and 442 natural product leads. The line coloring scheme is the same as Figure S11.

Branch10

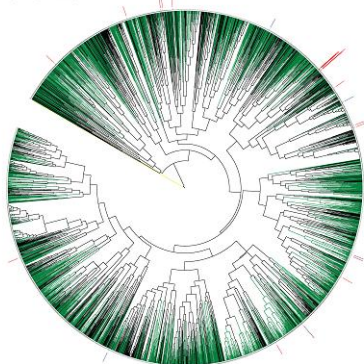

Branch11

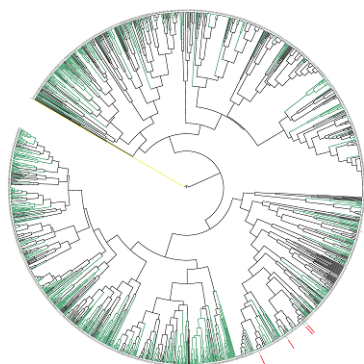

Branch12

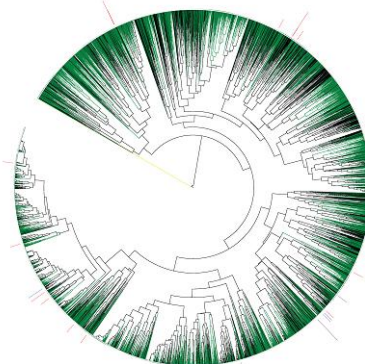

Branch13

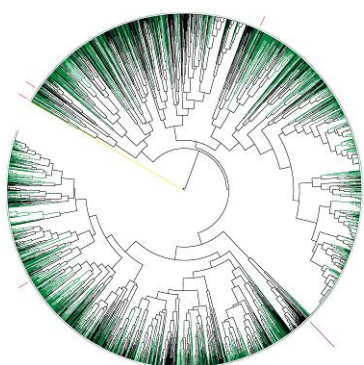

Branch14

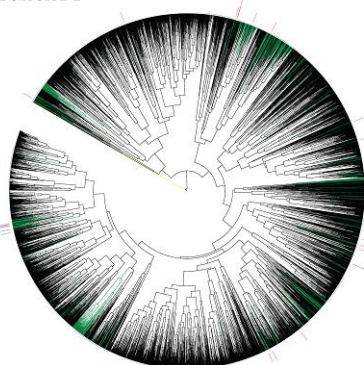

Branch15

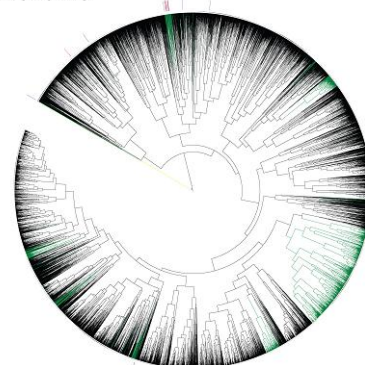

Branch16

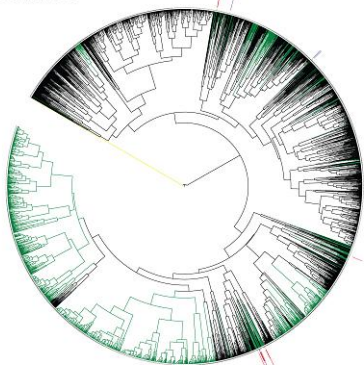

Branch17

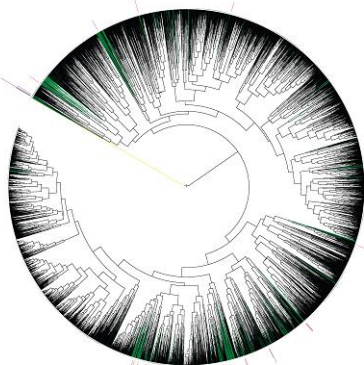

Branch18

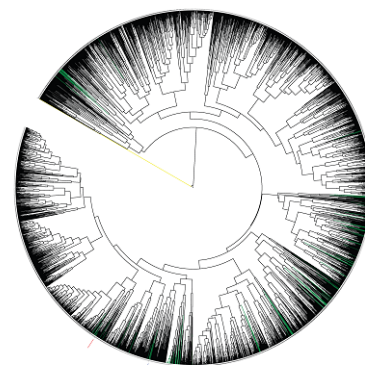

**Supplementary Figure S16** Distribution of the bioactive natural products with respect to the leads of approved and clinical trial drugs in branches 19-27 of the molecular-fingerprint Tanimoto-coefficient similarity clustering tree of the 137,836 natural products and 442 natural product leads. The line coloring scheme is the same as Figure S11.

Branch19

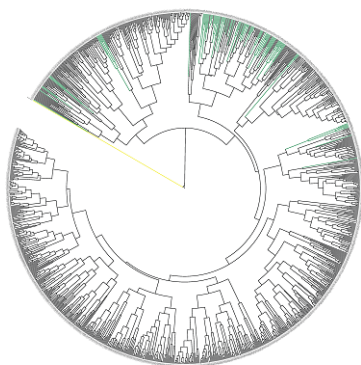

Branch20

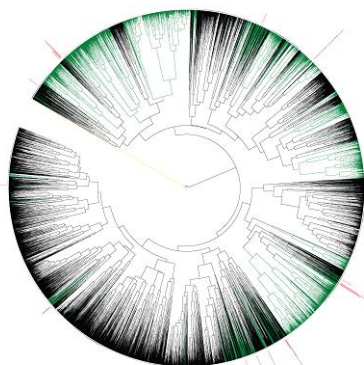

Branch21

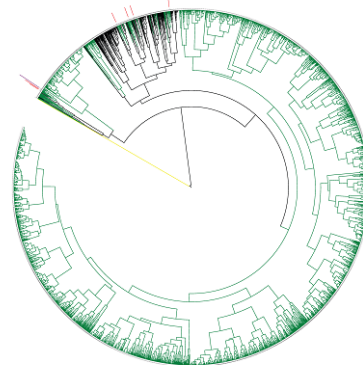

Branch22

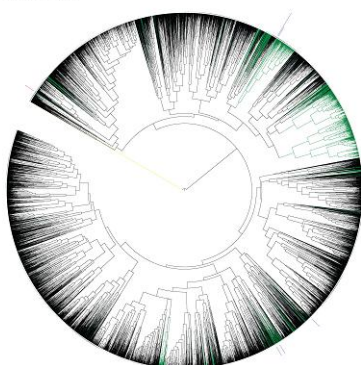

Branch23

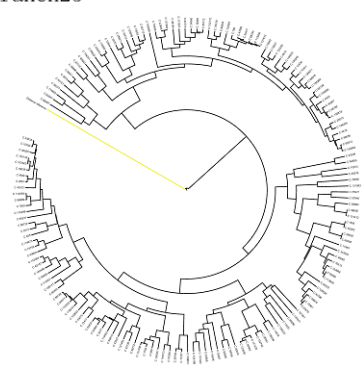

Branch24

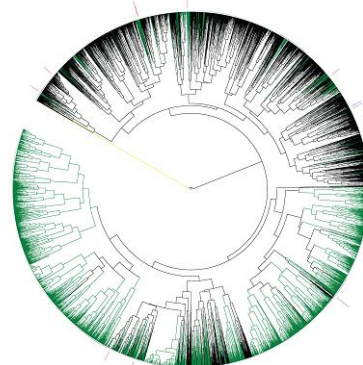

Branch25

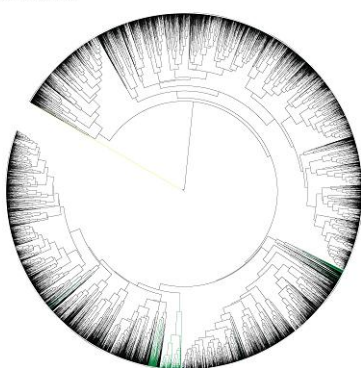

Branch26

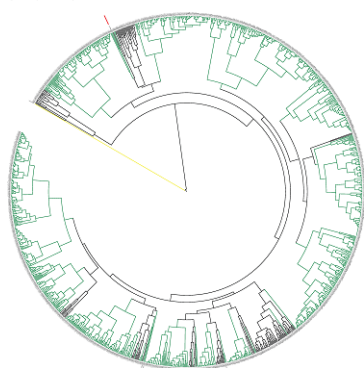

Branch27

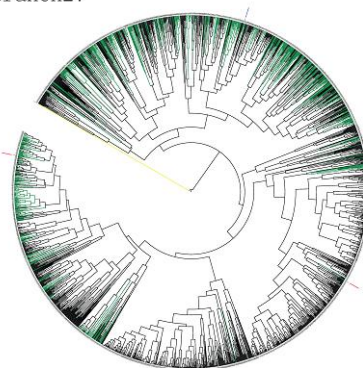

**Supplementary Figure S17** Distribution of the bioactive natural products with respect to the leads of approved and clinical trial drugs in branches 28-33 of the molecular-fingerprint Tanimoto-coefficient similarity clustering tree of the 137,836 natural products and 442 natural product leads. The line coloring scheme is the same as Figure S11.

Branch28

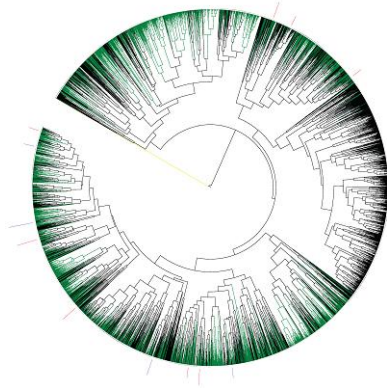

Branch29

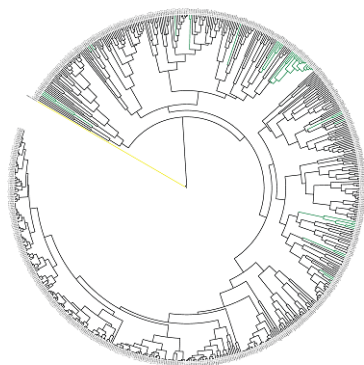

Branch30

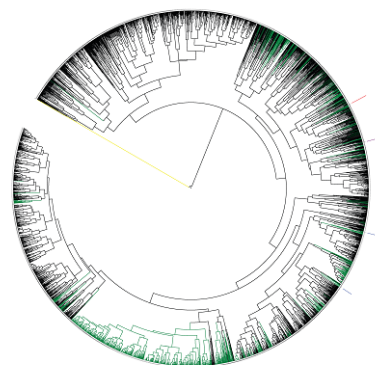

Branch31

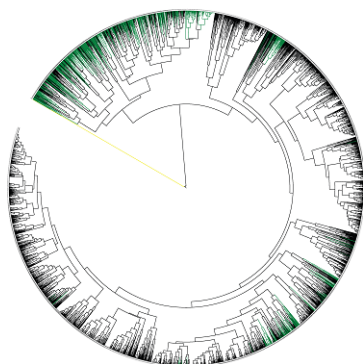

Branch32

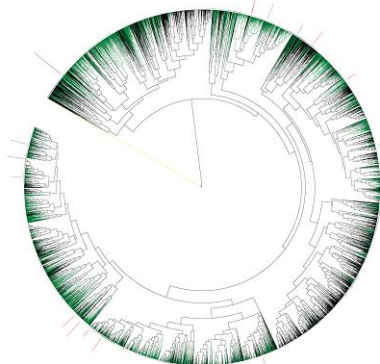

Branch33

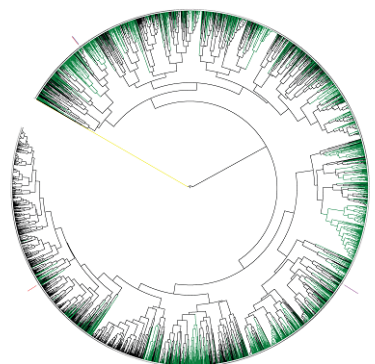

**Supplementary Figure S18** The exploration times of the bioactive natural products (green colored lines on top of the clustering tree) and the leads of approved and clinical trial drugs (the red, purple and blue lines on top of the clustering tree) in branches 1-9 of the molecular-fingerprint Tanimoto-coefficient similarity clustering tree. The length of each line on top of the tree correlates to the exploration time of a natural product or a drug lead with a scale of 1 to 11 corresponding to  $\leq 5$ , 5-10, ..., 45-50, and  $\geq 50$  years from 2012. The drug-lead productive clusters are in red-orange color.

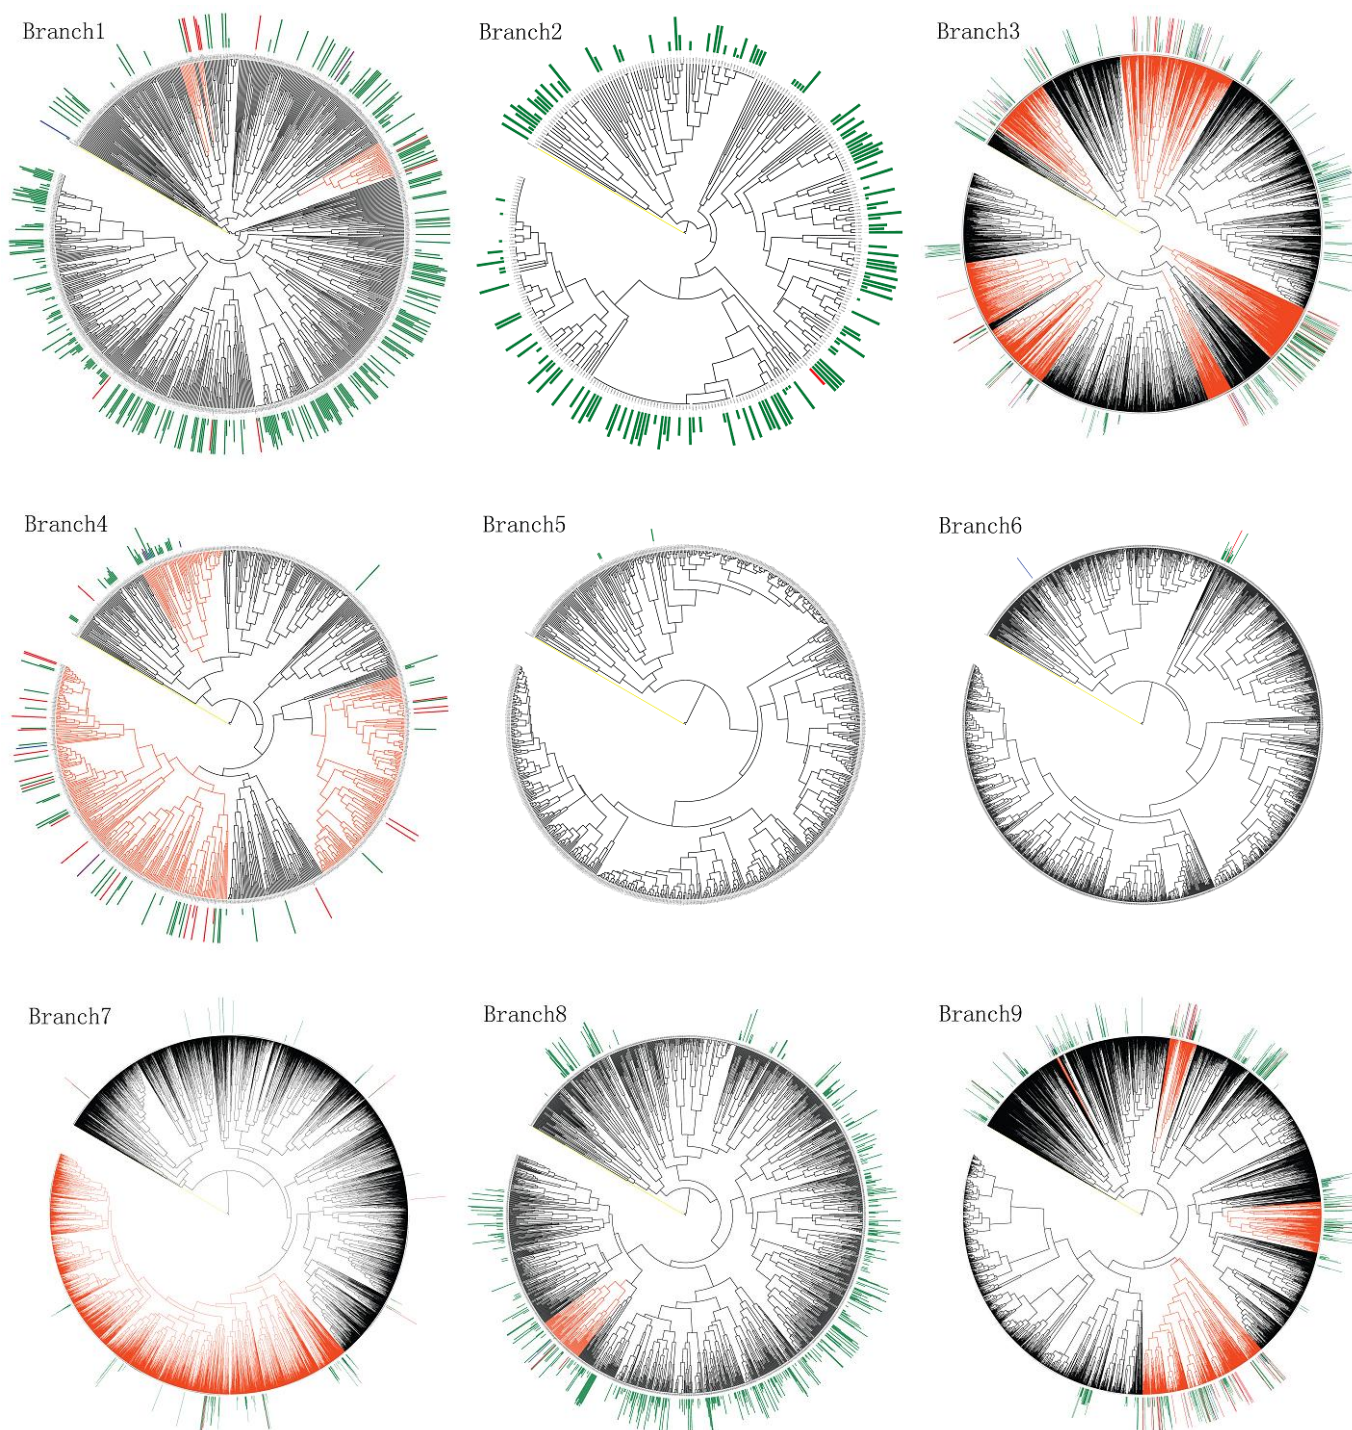

**Supplementary Figure S19** The exploration times of the bioactive natural products and the leads of approved and clinical trial drugs in branches 10-18 of the molecular-fingerprint Tanimoto-coefficient similarity clustering tree. The line coloring scheme is the same as in Supplementary Figure S15.

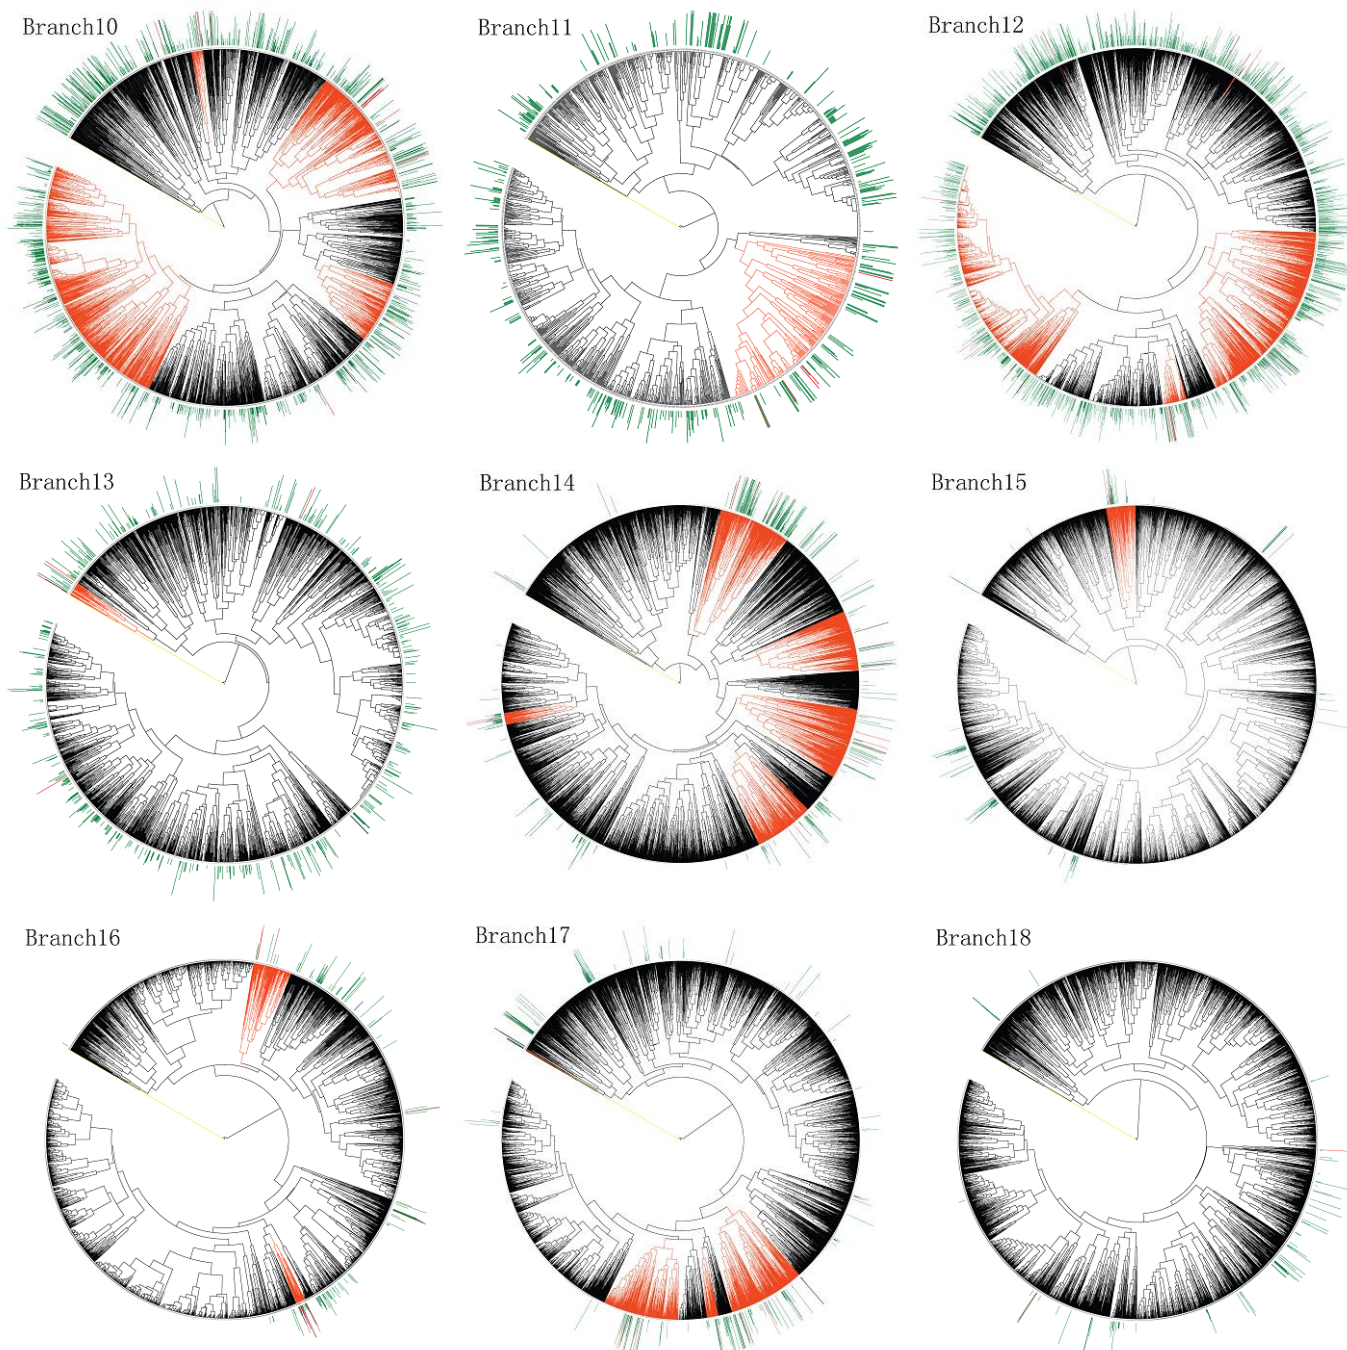

**Supplementary Figure S20** The exploration times of the bioactive natural products and the leads of approved and clinical trial drugs in branches 19-27 of the molecular-fingerprint Tanimoto-coefficient similarity clustering tree. The line coloring scheme is the same as in Supplementary Figure S15.

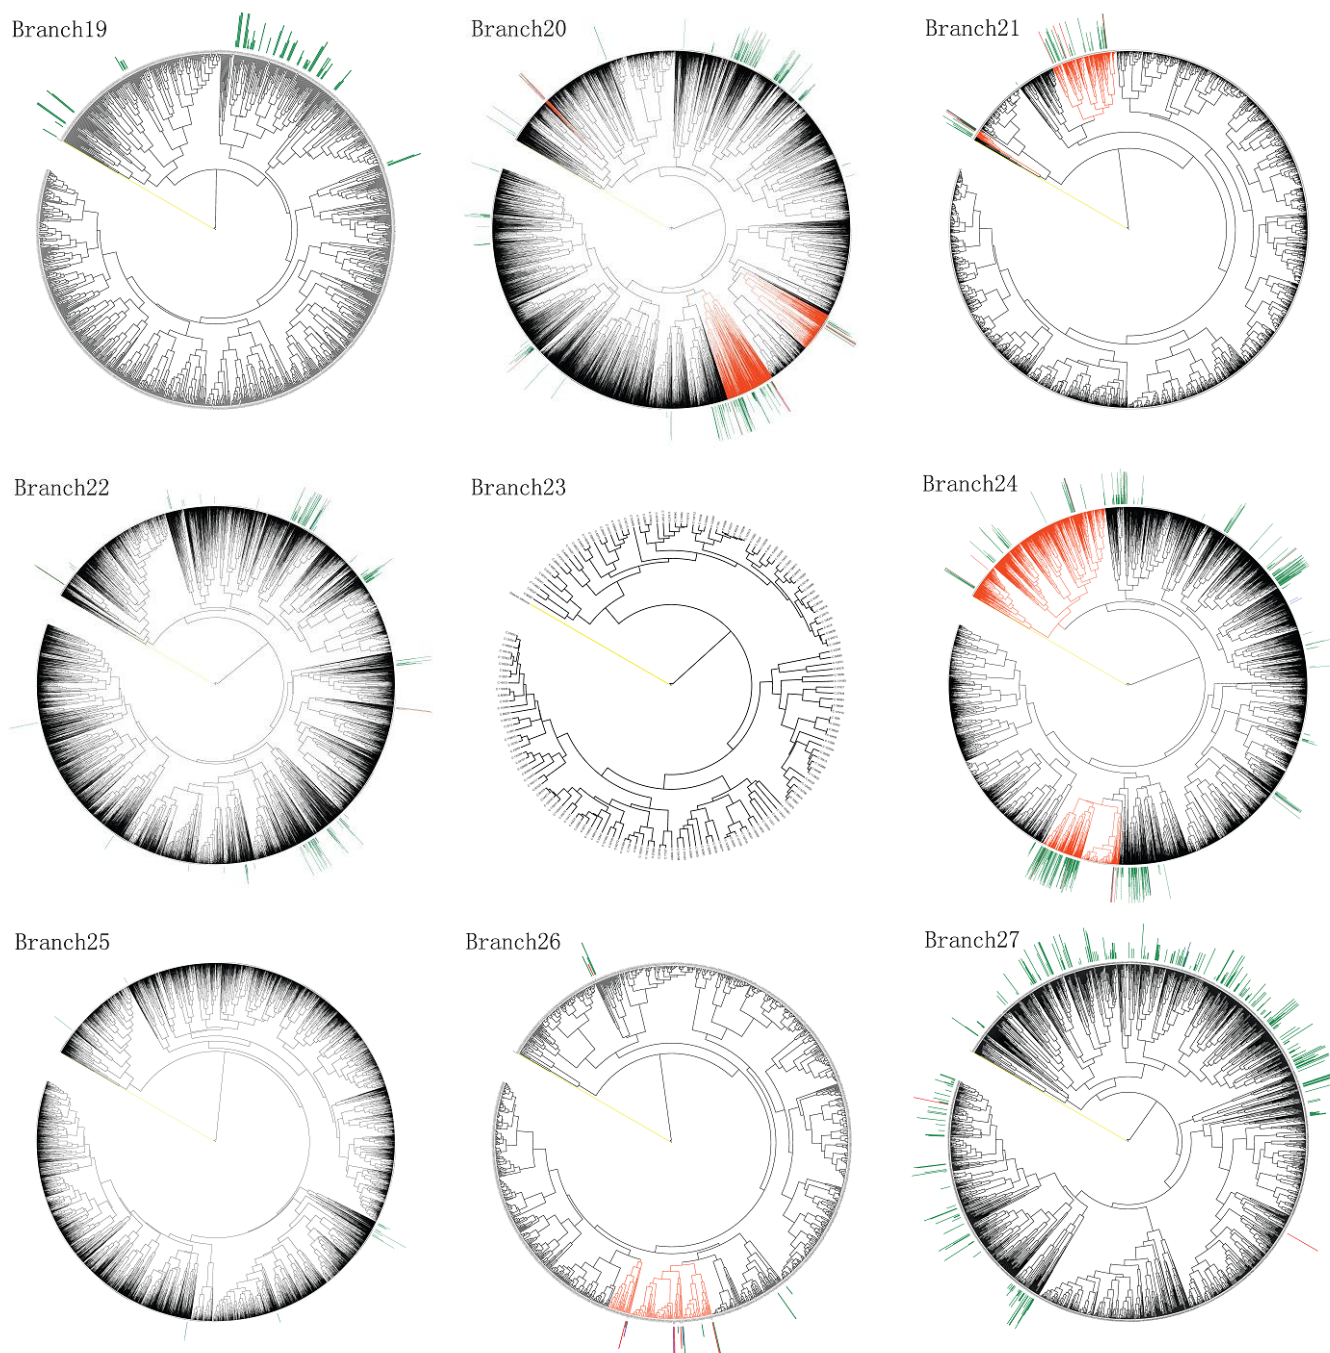

**Supplementary Figure S21** The exploration times of the bioactive natural products and the leads of approved and clinical trial drugs in branches 28-33 of the molecular-fingerprint Tanimoto-coefficient similarity clustering tree. The line coloring scheme is the same as in Supplementary Figure S15.

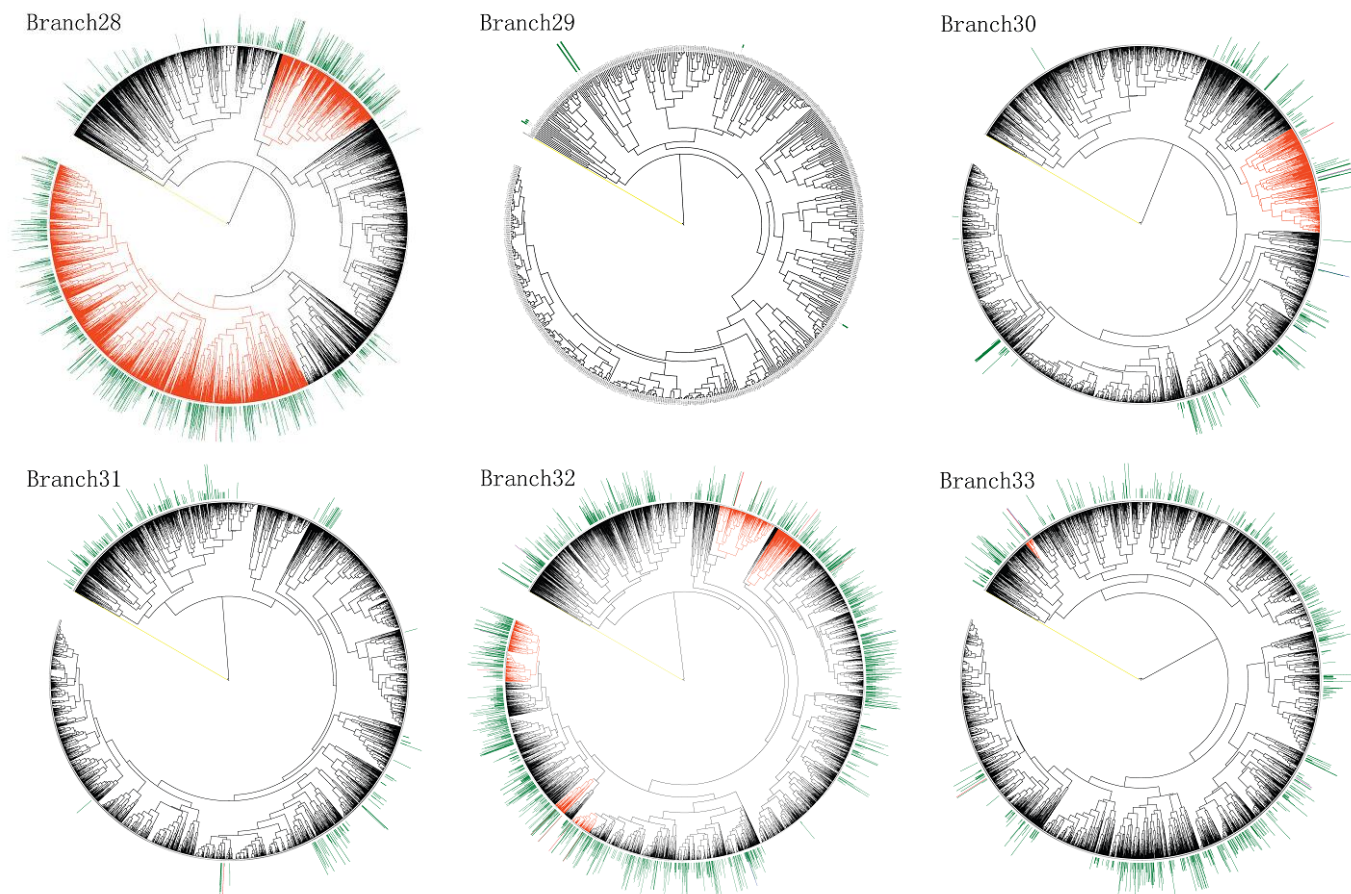

**Supplementary Figure S22** Distribution of the approved NP-related drugs, grouped into specific disease classes, in the drug-productive clusters DC1 to DC60. Disease classes are labeled according to the international classification of diseases ICD-10 as: A00-B99 infectious & parasitic diseases (Red), C00-D49 neoplasms (Blue), D50-D89 blood & immune-related diseases, E00-E90 endocrine & metabolic diseases (Purple), F01-F99 mental disorders, G00-G99 nervous system diseases, H00-H59 eye diseases, I00-I99 circulatory system disorders (Green), J00-J99 respiratory system disorders, K00-K95 digestive system disorders, L00-L99 skin diseases, M00-M99 musculoskeletal system & connective tissue disorders, N00-N99 genitourinary system disorders (Orange), O00-O9A reproductive system disorders, P00-P96 perinatal originated diseases, R00-R99 unclassified disorders, S00-T88 injury & poisoning.

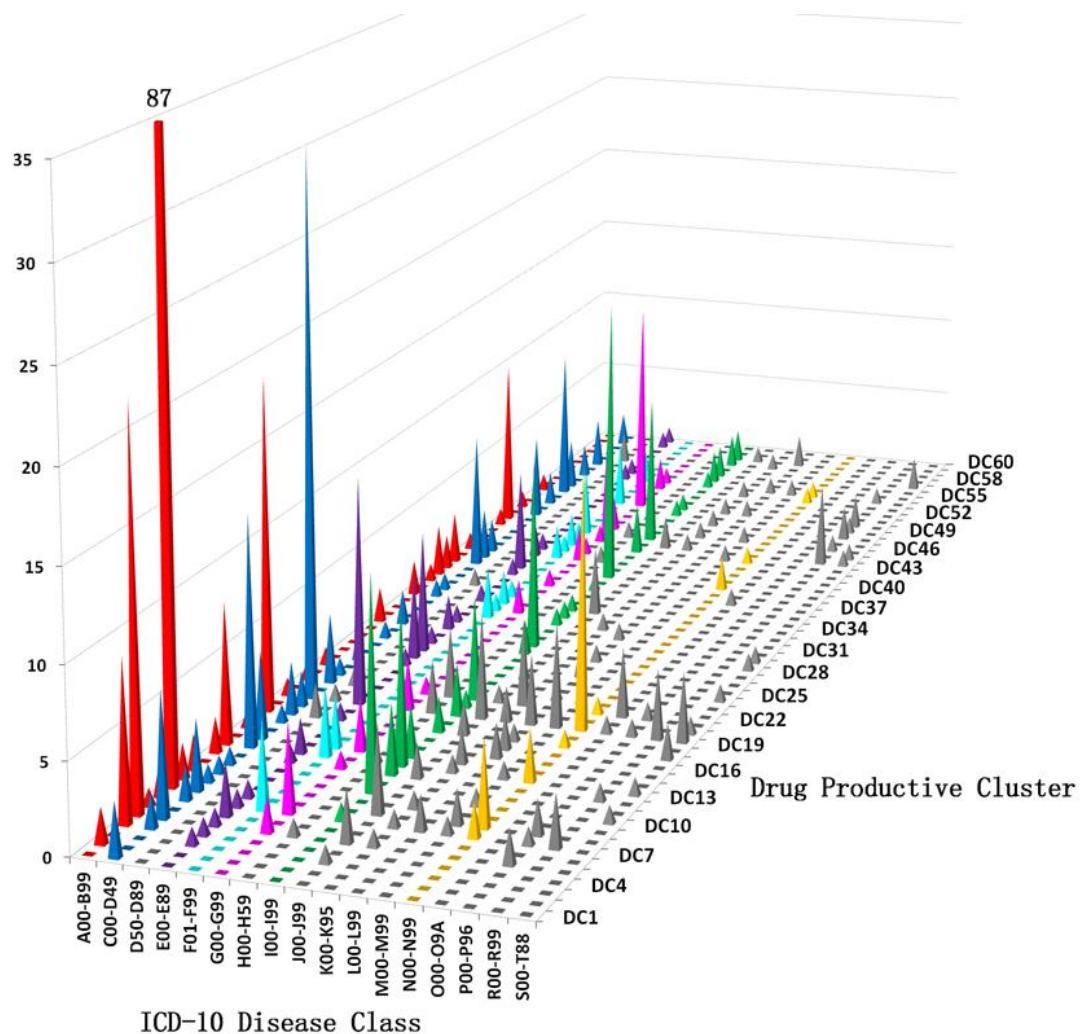

Supplement: srep09325-s1.pdf [file srep09325-s1.pdf]
